# Supplementary material for: Remarkable iodine uptake by aniline-based macrocyclic arenes through a reverse dissolution mechanism
Source: Royal Society of Chemistry journal article supplement (doi:10.1039/d3ta01782f), 2023-01-01
Supplement: d3ta01782f1.pdf [file d3ta01782f1.pdf]

## **Remarkable iodine uptake by aniline-based macrocyclic arenes through a reverse dissolution mechanism**

Pengyue Jin,<sup>a</sup> Wenting Liang,<sup>b</sup> Yanqin Rong,<sup>a</sup> Wuanhua Wu,<sup>\*a</sup> Min Gou,<sup>\*a</sup> Yueqin Tang,<sup>a</sup> and Cheng Yang<sup>\*a</sup>

<sup>a</sup>. Key Laboratory of Green Chemistry & Technology of Ministry of Education, College of Chemistry, State Key Laboratory of Biotherapy, and College of Architecture and Environment, Sichuan University, Chengdu 610064, China.

<sup>b</sup>. Institute of Environmental Science, & Department of Chemistry, Shanxi University, Taiyuan 030006, China.

---

## Supplemental Experimental Procedures

### Table of Contents

|                                                                     |     |
|---------------------------------------------------------------------|-----|
| 1. Materials and methods                                            | S3  |
| 2. Synthesis and characterizations of <b>An[2]s</b> and <b>P-Ns</b> | S4  |
| 3. UV-vis and fluorescence spectra of <b>An[2]s</b>                 | S21 |
| 4. DFT calculation                                                  | S23 |
| 5. Iodine vapor capture by <b>An[2]s</b> and <b>P-Ns</b>            | S24 |
| 6. Iodine uptake experiments in an aqueous solution                 | S37 |
| 7. Fixed bed adsorption experiment                                  | S44 |
| 8. Iodine release                                                   | S46 |
| 9. Selectivity and Reproducibility study                            | S50 |
| 10. References                                                      | S52 |

---

## 1. Materials and methods

All reagents were purchased commercially and used without further purification unless otherwise noted. Iodine (99.99%) was purchased from Adamas-beta Chemical Company.  $^1\text{H}$  and  $^{13}\text{C}$  NMR spectra were recorded at room temperature on a Bruker AMX-400 (operating at 400 MHz for  $^1\text{H}$  NMR and 101 MHz for  $^{13}\text{C}$  NMR) with TMS as the internal standard. HRMS data were measured with a Waters-Q-TOF Premiers (ESI) spectrometer. UV-vis spectra were recorded by using a JASCO V650 spectrometer. Fluorescence spectra were taken on a JASCO FP-8500 spectrofluorometer, and the bandwidth for the measurement was not fixed. Fourier transform infrared (FT-IR) spectroscopy measurements were performed on a Bruker Tensor 27 spectrophotometer. Thermogravimetric Analysis (TGA) was recorded using a DTG-60 instrument or TA Instruments Q50, and the samples were heated under a flowing nitrogen atmosphere at a rate of 10 °C/min. Powder X-ray diffraction (PXRD) data were measured with a powder X-ray diffractometer (X' Pert Pro MPD DY129) at a range of 5-60° of 2 $\theta$ . Field emission scanning electron microscope (FESEM) and energy-dispersive spectroscopy (EDS) investigations were carried out on Thermo Scientific Apreo 2C. X-ray photoelectron spectroscopy (XPS) was obtained on a Thermo Fisher ESCALAB 250Xi. N<sub>2</sub> adsorption isotherms measurements were performed with a QUANTACHROME instrument at 77.35 K

## 2. Synthesis and characterizations of An[2]s and P-Ns

### Synthesis of Ans

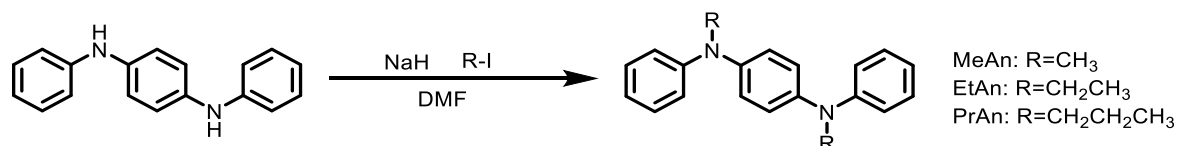

**MeAn:** N,N'-Diphenyl-p-phenylenediamine (5.23 g, 20 mmol) and NaH (2.4 g, 100 mmol) were added in 100 mL of DMF in an ice bath. After stirring for 30 min, 4 mL CH<sub>3</sub>I was added to the reaction mixture, and the reaction mixture was stirred under an N<sub>2</sub> atmosphere at room temperature for additional 4 h until the reaction was completed (as monitored by TLC). 100 mL water was added, and brown precipitate was collected by filtration. The solid was washed with water 3 times and dissolved in ethyl acetate. The organic phase was dried over Na<sub>2</sub>SO<sub>4</sub>, and the solvent was removed under reduced pressure. The residue was purified by silica gel column chromatography (PE:DCM = 2:1) to afford **MeAn** as a yellow solid (5.17 g, 89.7%). <sup>1</sup>H NMR (400 MHz, CDCl<sub>3</sub>) δ 7.26 (dd, *J* = 8.6, 7.3 Hz, 4H), 7.04 (s, 4H), 6.97 (s, 4H), 6.89 (t, *J* = 7.3 Hz, 2H), 3.31 (s, 6H). <sup>13</sup>C NMR (101 MHz, CDCl<sub>3</sub>) δ 149.4, 143.9, 129.1, 123.3, 119.9, 118.3, 40.4. HRMS (ESI) *m/z* calcd for C<sub>20</sub>H<sub>20</sub>N<sub>2</sub>: 288.1627 [M]; found: 288.1654. m.p. 156.4-156.6 °C

**EtAn:** N,N'-Diphenyl-p-phenylenediamine (5.23 g, 20 mmol) and NaH (2.4 g, 100 mmol) were added in 100 mL of DMF in an ice bath. After stirring for 30 min, 4.68 mL CH<sub>3</sub>CH<sub>2</sub>I was added to the reaction mixture, and the reaction mixture was stirred under an N<sub>2</sub> atmosphere at room temperature for additional 4 h until the reaction was completed. 100 mL water was added, and brown precipitate was collected by filtration. The solid was washed with water 3 times and dissolved in ethyl acetate. The organic phase was dried over Na<sub>2</sub>SO<sub>4</sub>, and the solvent was removed under reduced pressure. The residue was purified by silica gel column chromatography (PE:DCM = 3:1) to afford **EtAn** as a yellow solid (5.45 g, 86.3%). <sup>1</sup>H NMR (400 MHz, CDCl<sub>3</sub>) δ 7.54 – 7.47 (m, 4H), 7.26 (s, 4H), 7.23 – 7.15 (m, 4H), 7.13 (ddt, *J* = 8.4, 7.4, 1.1 Hz, 2H), 4.02 (q, *J* = 7.1 Hz, 4H), 1.50 (dd, *J* = 9.3, 4.9 Hz, 6H). <sup>13</sup>C NMR (101 MHz, CDCl<sub>3</sub>) δ 148.2, 142.8, 129.2, 124.1, 119.5, 118.5, 46.5, 12.75. HRMS (ESI) *m/z* calcd for C<sub>22</sub>H<sub>24</sub>N<sub>2</sub>: 316.1940 [M]; found: 316.1984. m.p. 99.2-99.4 °C

**PrAn:** N,N'-Diphenyl-p-phenylenediamine (5.23 g, 20 mmol) and NaH (2.4 g, 100 mmol) were added in 100 mL of DMF in an ice bath. After stirring for 30 min, 5.83 mL CH<sub>3</sub>CH<sub>2</sub>CH<sub>2</sub>I was added to the reaction mixture, and the reaction mixture was stirred under an N<sub>2</sub> atmosphere at room temperature for additional 4 h until the reaction was completed. 100 mL water was added, and brown precipitate was collected by filtration. The solid was washed with water 3 times and dissolved in ethyl acetate. The organic phase was dried over Na<sub>2</sub>SO<sub>4</sub>, and the solvent was removed under reduced pressure. The residue was purified by silica gel column chromatography (PE:DCM = 3:1) to afford **PrAn** as a yellow solid (6.13 g, 89.2%). <sup>1</sup>H NMR (400 MHz, CDCl<sub>3</sub>) δ 7.54 – 7.48 (m, 4H), 7.26 (s, 4H), 7.19 (d, *J* = 7.8 Hz, 4H), 7.13 (t, *J* = 7.3 Hz, 2H), 3.97 – 3.82 (m, 4H), 2.03 – 1.93 (m, 4H), 1.23 (t, *J* = 7.4 Hz, 6H). <sup>13</sup>C NMR (101 MHz, CDCl<sub>3</sub>) δ 148.5, 142.6, 129.1, 124.1, 119.5, 118.5, 54.2, 20.7, 11.4. HRMS (ESI) *m/z* calcd for C<sub>24</sub>H<sub>28</sub>N<sub>2</sub>: 344.2253 [M]; found: 344.2268. m.p. 84.1-84.2 °C



## Synthesis of An[2]s

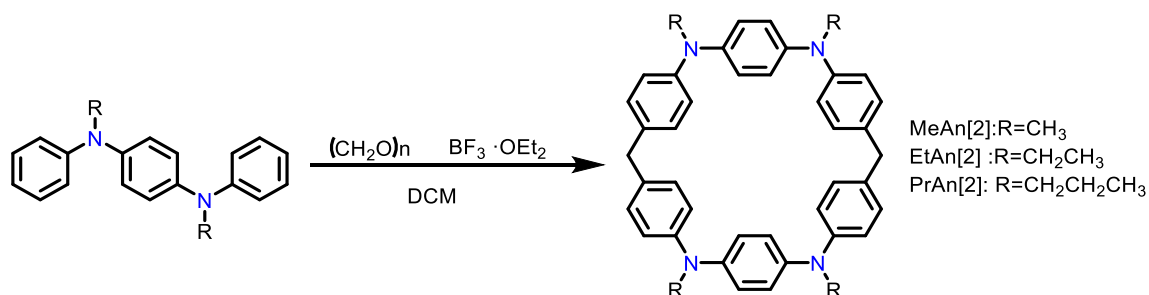

**MeAn[2]:** **MeAn** (2.88 g, 10 mmol) and paraformaldehyde (900 mg, 30 mmol) were added in 300 mL dichloromethane. After the suspension was stirred at 25 °C for 30 min, BF<sub>3</sub>·OEt<sub>2</sub> (1.2 mL, 10 mmol) was added. The reaction mixture was stirred at room temperature for 24 h, and then quenched by the addition of water. The precipitate was collected by filtration and washed with ethyl acetate to give a dark blue solid which is the linear polymer P-A. The organic phase was washed with saturated aqueous NaHCO<sub>3</sub>, H<sub>2</sub>O, and brine and dried over Na<sub>2</sub>SO<sub>4</sub>. After the solvent was removed under reduced pressure, the residue was subjected to silica gel column chromatography (PE:EA = 8:1) to give **MeAn[2]** as a white solid (1.21 g, 40.12%). <sup>1</sup>H NMR (400 MHz, CDCl<sub>3</sub>) δ 7.02 (d, *J* = 8.5 Hz, 8H), 6.89 (d, *J* = 8.5 Hz, 8H), 6.80 (s, 8H), 3.83 (s, 4H), 3.23 (s, 12H). <sup>13</sup>C NMR (101 MHz, CDCl<sub>3</sub>) δ 147.5, 143.9, 134.9, 129.4, 121.3, 120.5, 49.5, 40.5. HRMS (ESI) *m/z* calcd for C<sub>42</sub>H<sub>40</sub>N<sub>4</sub>: 600.3253 [M]; found: 600.3291. m.p. >300 °C

**EtAn[2]:** **EtAn** (3.16 g, 10 mmol) and paraformaldehyde (900 mg, 30 mmol) were added in 300 mL dichloromethane. After the suspension was stirred at 25 °C for 30 min, BF<sub>3</sub>·OEt<sub>2</sub> (1.2 mL, 10 mmol) was added. The reaction mixture was stirred at room temperature for 24 h, and then quenched by the addition of water. The precipitate was collected by filtration and washed with ethyl acetate to give a dark blue solid which is the linear polymer P-B. The organic phase was washed with saturated aqueous NaHCO<sub>3</sub>, H<sub>2</sub>O, and brine and dried over Na<sub>2</sub>SO<sub>4</sub>. After the solvent was removed under reduced pressure, the residue was subjected to silica gel column chromatography (PE: EA = 10 :1) to afford **EtAn[2]** as a white solid (1.43g, 43.56%). <sup>1</sup>H NMR (400 MHz, CDCl<sub>3</sub>) δ 6.99 (d, *J* = 8.5 Hz, 8H), 6.86 (t, *J* = 6.6 Hz, 8H), 6.75 (s, 8H), 3.82 (s, 4H), 3.68 (q, *J* = 7.0 Hz, 8H), 1.17 (t, *J* = 7.1 Hz, 12H). <sup>13</sup>C NMR (101 MHz, CDCl<sub>3</sub>) δ 146.1, 142.2, 134.5, 129.5, 121.8, 121.0, 46.4, 40.4, 12.8. HRMS (ESI) *m/z* calcd for C<sub>46</sub>H<sub>48</sub>N<sub>4</sub>: 656.3879 [M]; found: 656.3905. m.p. >300 °C

**PrAn[2]:** **PrAn** (3.44 g, 10 mmol) and paraformaldehyde (900 mg, 30 mmol) were added in 300 mL dichloromethane. After the suspension was stirred at 25 °C for 30 min, BF<sub>3</sub>·OEt<sub>2</sub> (1.2 mL, 10 mmol) was added. The reaction mixture was stirred at room temperature for 24 h, and then quenched by the addition of water. The precipitate was collected by filtration and washed with ethyl acetate to give a dark blue solid which is the linear polymer P-C. The organic phase was washed with saturated aqueous NaHCO<sub>3</sub>, H<sub>2</sub>O, and brine and dried over Na<sub>2</sub>SO<sub>4</sub>. After the solvent was removed under reduced pressure, the residue was subjected to silica gel column chromatography (PE:EA = 12 :1) to afford **PrAn[2]** as a white solid (1.62 g, 45.49%). <sup>1</sup>H NMR (400 MHz, CDCl<sub>3</sub>) δ 7.01 (d, *J* = 8.5 Hz, 8H), 6.90 – 6.84 (m, 8H), 6.76 (s, 8H), 3.84 (s, 4H), 3.62 – 3.54 (m, 8H), 1.71 – 1.61 (m, 8H), 0.93 (t, *J* = 7.4 Hz, 12H). <sup>13</sup>C NMR (101 MHz, CDCl<sub>3</sub>) δ 146.5, 142.6, 134.4, 129.5, 121.8, 121.0, 54.1, 40.3, 20.7, 11.5. HRMS (ESI) *m/z* calcd for C<sub>50</sub>H<sub>56</sub>N<sub>4</sub>: 712.4505 [M]; found: 712.3437. m.p. >300 °C.

**Table S1.** Synthesis of **MeAn[2]** under different conditions.

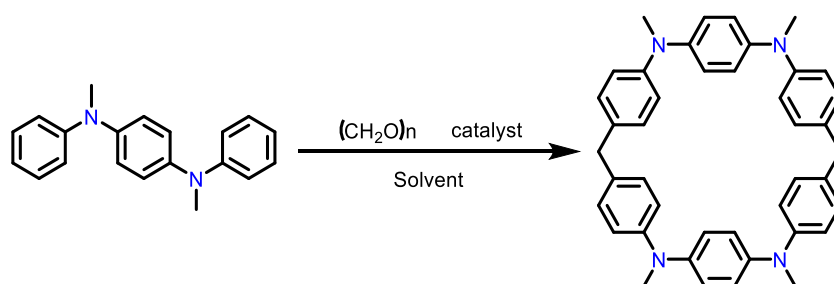

| entry | solvent            | catalyst                                  | $\frac{[\text{catalyst}]}{[\text{MeAn}]}$ | template          | Time/h    | Yield(%)   |
|-------|--------------------|-------------------------------------------|-------------------------------------------|-------------------|-----------|------------|
| 1     | dichloromethane    | $\text{BF}_3 \cdot \text{OEt}_2$          | 1 eq.                                     |                   | 6         | 15%        |
| 2     | dichloromethane    | $\text{BF}_3 \cdot \text{OEt}_2$          | 1 eq.                                     |                   | 12        | 20%        |
| 3     | dichloromethane    | $\text{BF}_3 \cdot \text{OEt}_2$          | 1 eq.                                     |                   | <b>24</b> | <b>40%</b> |
| 4     | dichloromethane    | $\text{BF}_3 \cdot \text{OEt}_2$          | 1 eq.                                     |                   | 36        | 35%        |
| 5     | dichloromethane    | $\text{BF}_3 \cdot \text{OEt}_2$          | 1 eq.                                     | 1 eq $\text{I}_2$ | 36        | 36%        |
| 6     | dichloromethane    | $\text{BF}_3 \cdot \text{OEt}_2$          | 1 eq.                                     | 1 eq KI           | 36        | 38%        |
| 7     | dichloromethane    | $\text{BF}_3 \cdot \text{OEt}_2$          | 0.1 eq.                                   |                   | 24        | <1%        |
| 8     | dichloromethane    | $\text{BF}_3 \cdot \text{OEt}_2$          | 0.5 eq.                                   |                   | 24        | 10%        |
| 9     | dichloromethane    | $\text{BF}_3 \cdot \text{OEt}_2$          | 2 eq.                                     |                   | 24        | 5%         |
| 10    | dichloromethane    | $\text{BF}_3 \cdot \text{OEt}_2$          | 5 eq.                                     |                   | 24        | 2%         |
| 11    | 1,2-dichloroethane | $\text{BF}_3 \cdot \text{OEt}_2$          | 1 eq.                                     |                   | 12        | 5%         |
| 12    | 1,2-dichloroethane | $\text{BF}_3 \cdot \text{OEt}_2$          | 1 eq.                                     |                   | 24        | 20%        |
| 13    | Chloroform         | $\text{BF}_3 \cdot \text{OEt}_2$          | 1 eq.                                     |                   | 12        | 10%        |
| 14    | Chloroform         | $\text{BF}_3 \cdot \text{OEt}_2$          | 1 eq.                                     |                   | 24        | 25%        |
| 15    | dichloromethane    | $\text{H}_2\text{SO}_4$                   | 1 eq.                                     |                   | 24        | <1%        |
| 16    | dichloromethane    | TFA                                       | 1 eq.                                     |                   | 24        | <1%        |
| 17    | dichloromethane    | TsOH                                      | 1 eq.                                     |                   | 24        | <1%        |
| 18    | dichloromethane    | $\text{FeCl}_3$                           | 1 eq.                                     |                   | 24        | <1%        |
| 20    | dichloromethane    | $\text{FeCl}_3 \cdot 6\text{H}_2\text{O}$ | 1 eq.                                     |                   | 24        | <1%        |
| 21    | dichloromethane    | $\text{AlCl}_3$                           | 1 eq.                                     |                   | 24        | <1%        |

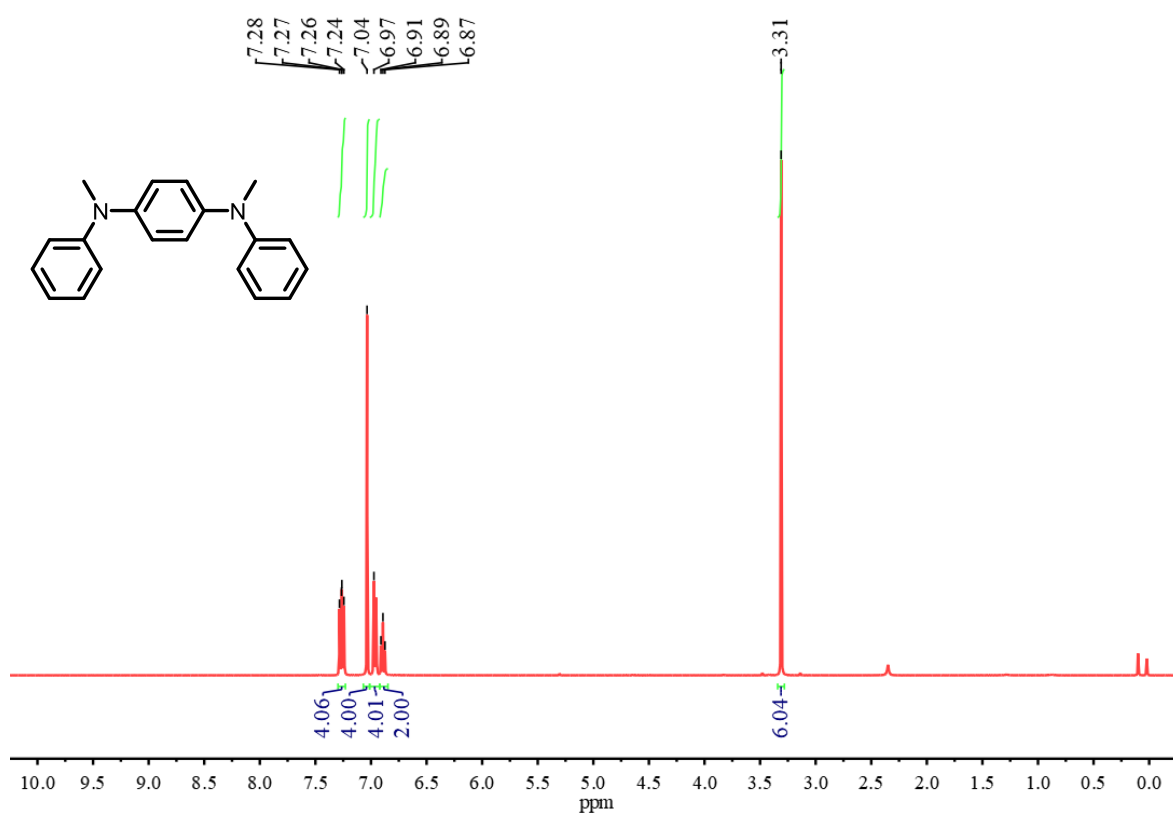

Fig. S1.  $^1\text{H}$  NMR spectrum of **MeAn** measured in  $\text{CDCl}_3$  at 25  $^\circ\text{C}$ .

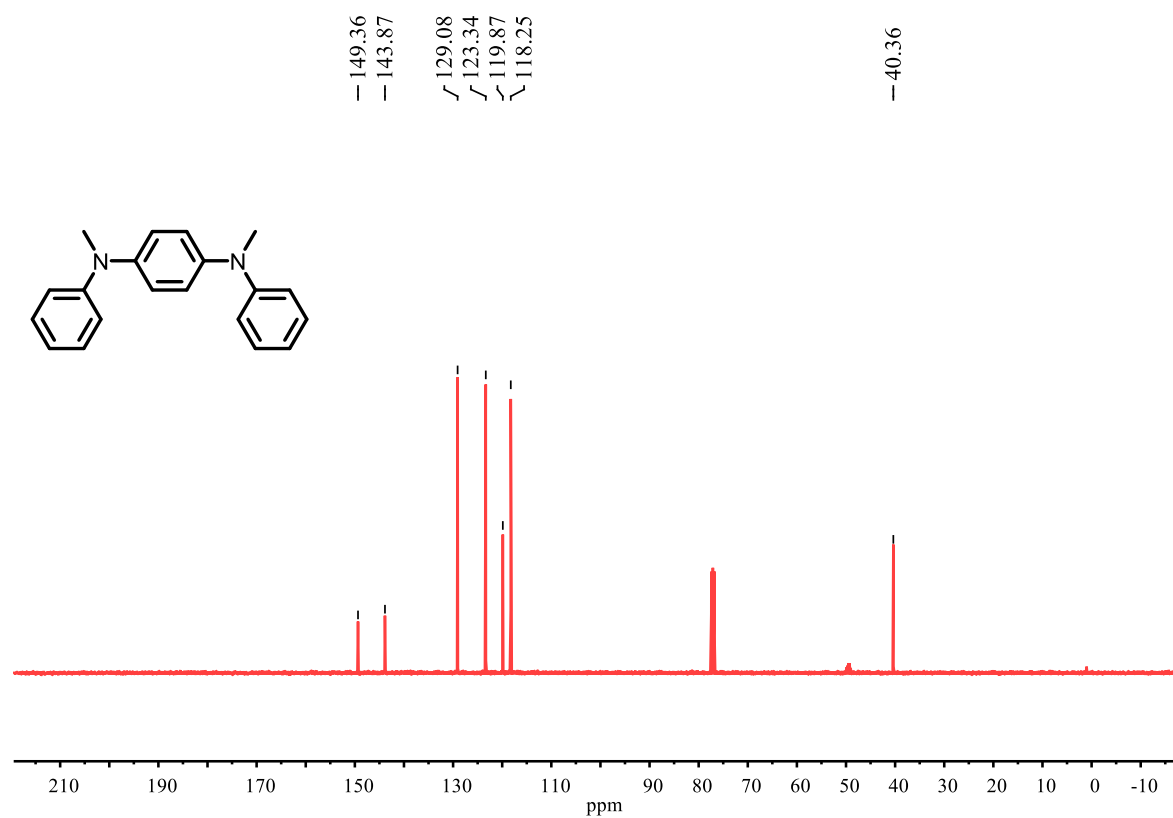

Fig. S2.  $^{13}\text{C}$  NMR spectrum of **MeAn** measured in  $\text{CDCl}_3$  at 25  $^\circ\text{C}$ .

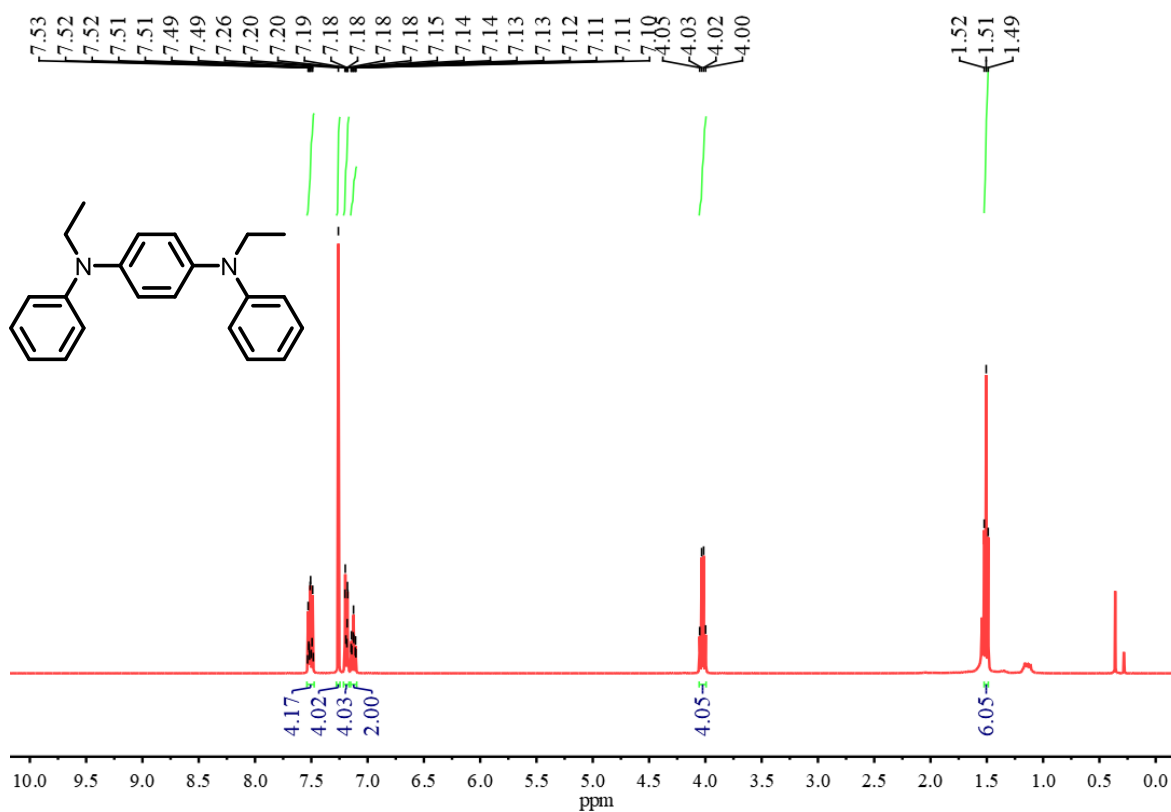

Fig. S3. <sup>1</sup>H NMR spectrum of **EtAn** measured in CDCl<sub>3</sub> at 25 °C

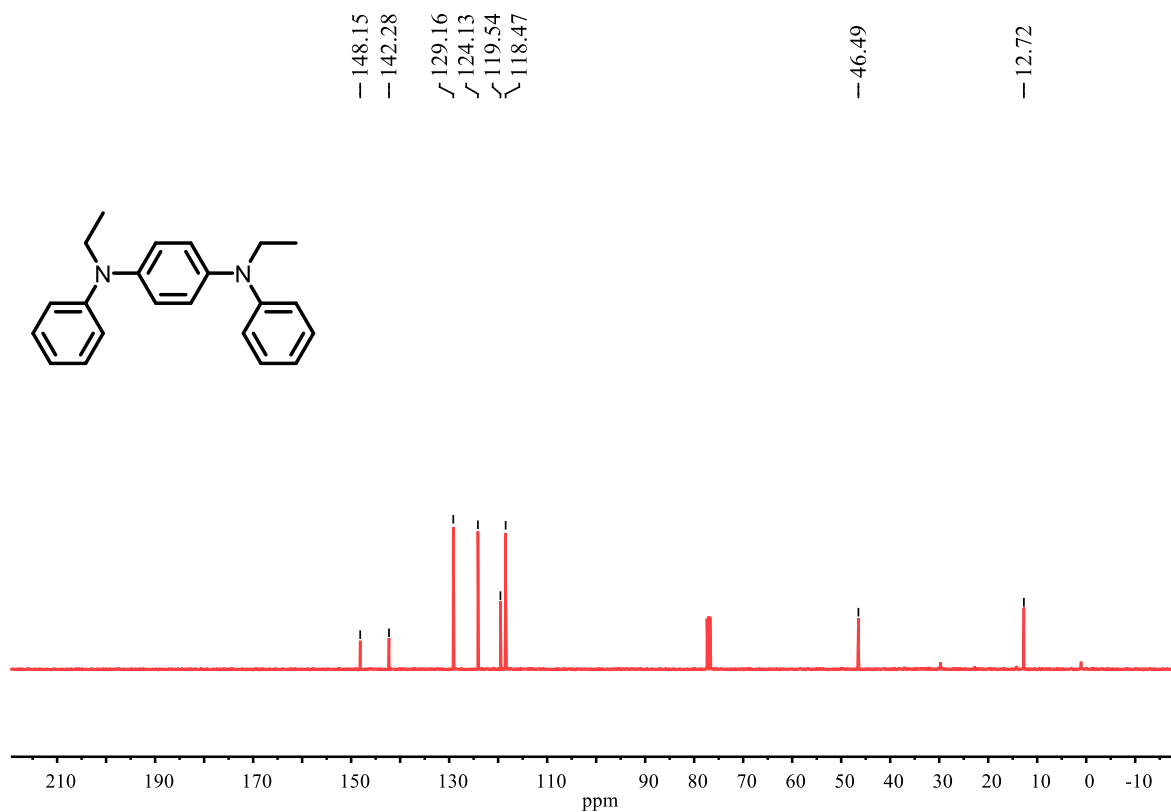

Fig. S4. <sup>13</sup>C NMR spectrum of **EtAn** measured in CDCl<sub>3</sub> at 25 °C.

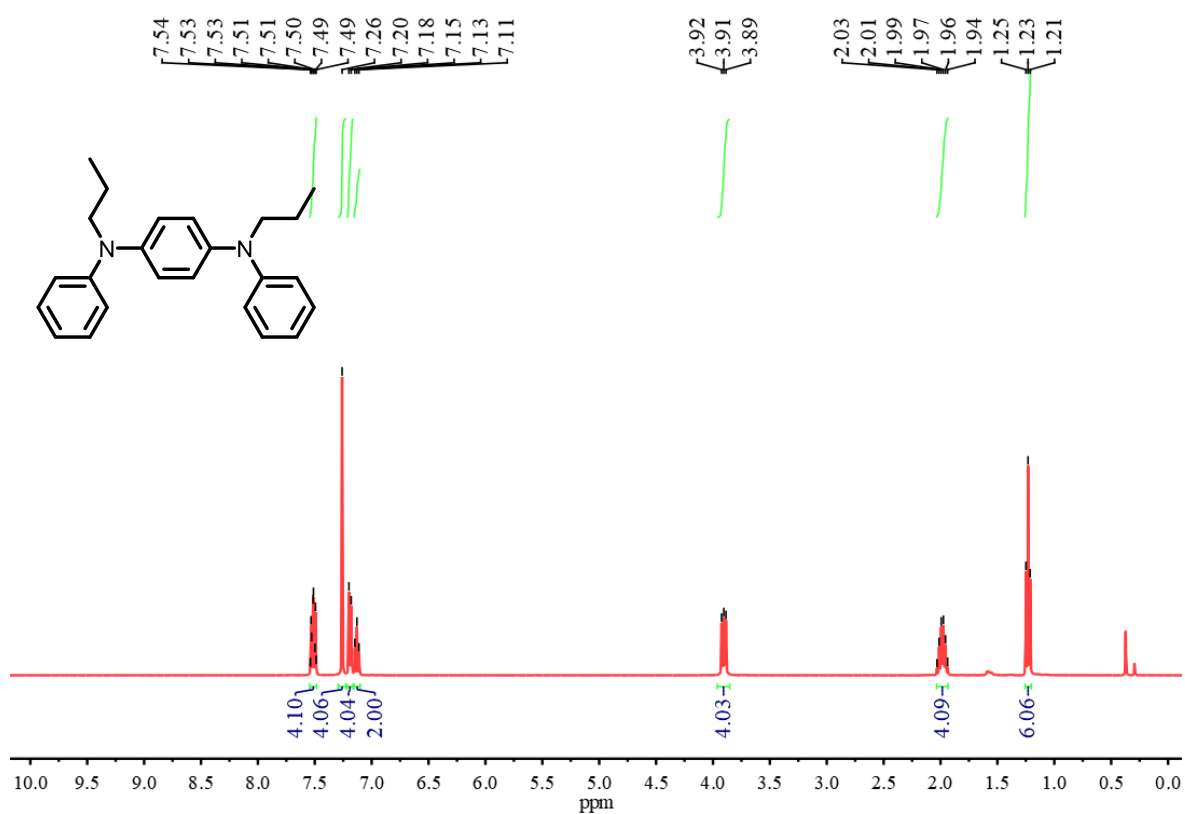

Fig. S5. <sup>1</sup>H NMR spectrum of **PrAn** measured in CDCl<sub>3</sub> at 25 °C.

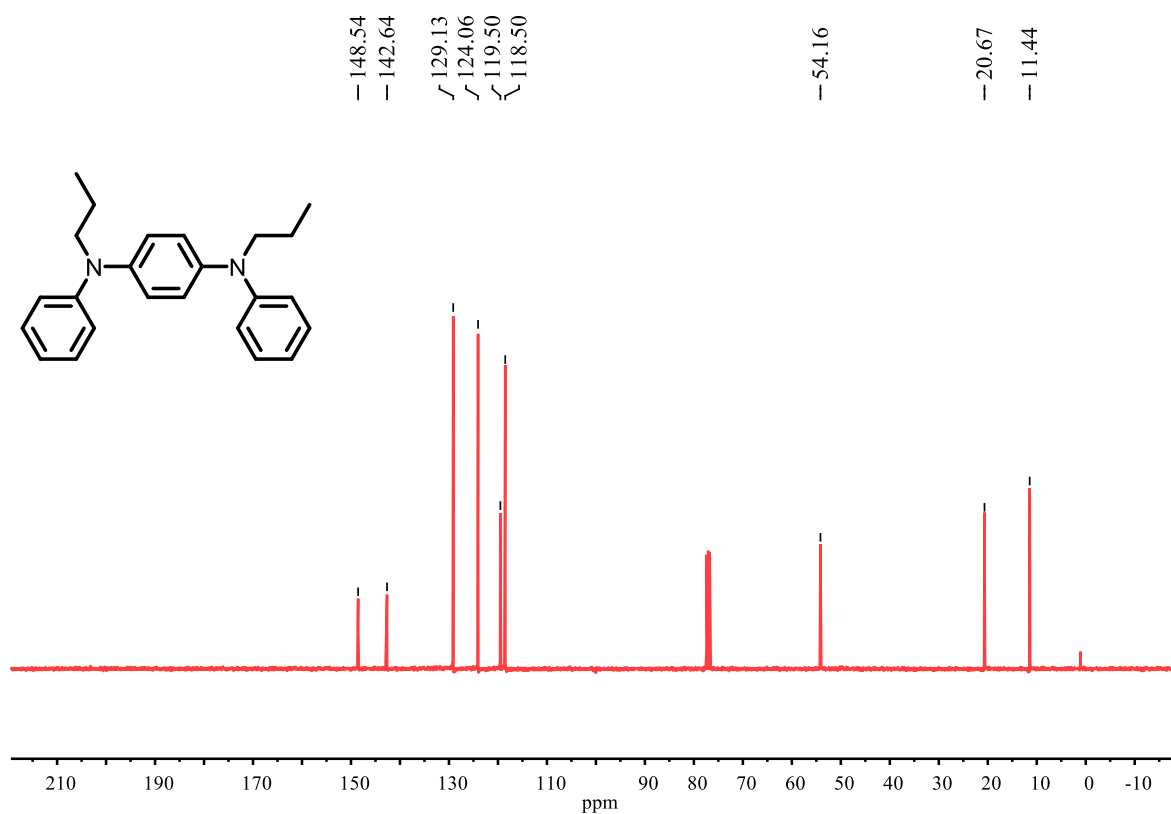

Fig. S6. <sup>13</sup>C NMR spectrum of **PrAn** measured in CDCl<sub>3</sub> at 25 °C.

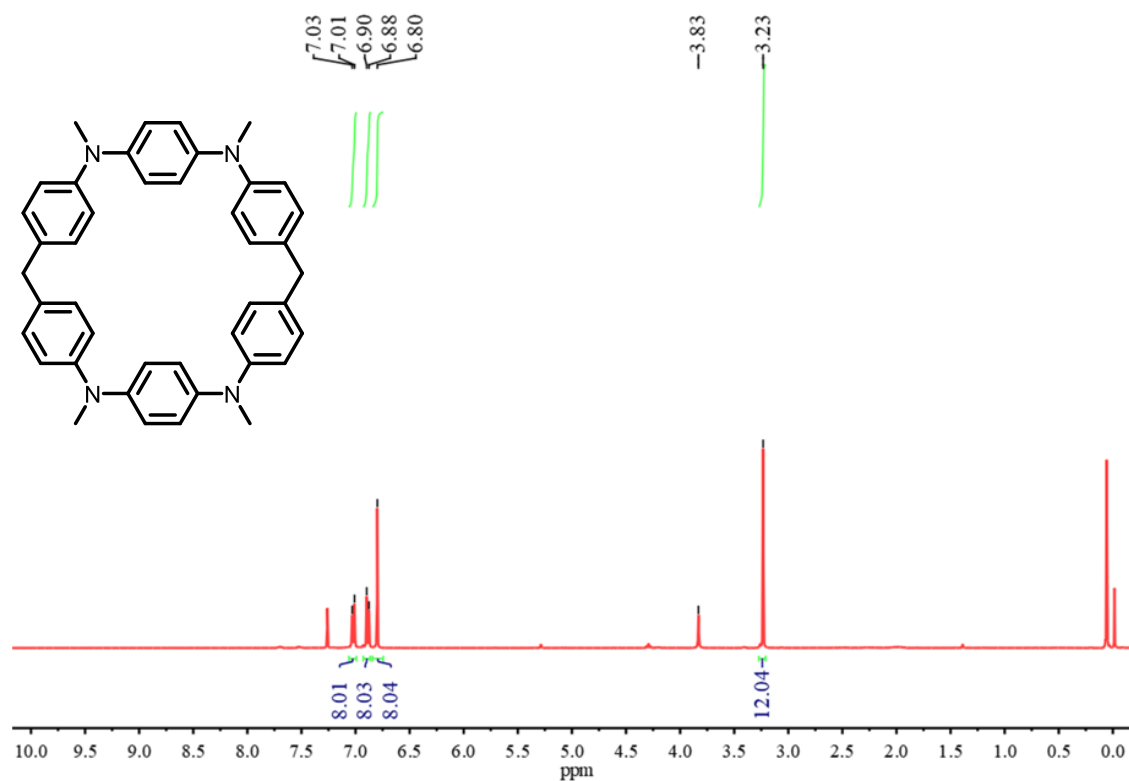

Fig. S7.  $^1\text{H}$  NMR spectrum of **MeAn[2]** measured in CDCl<sub>3</sub> at 25 °C.

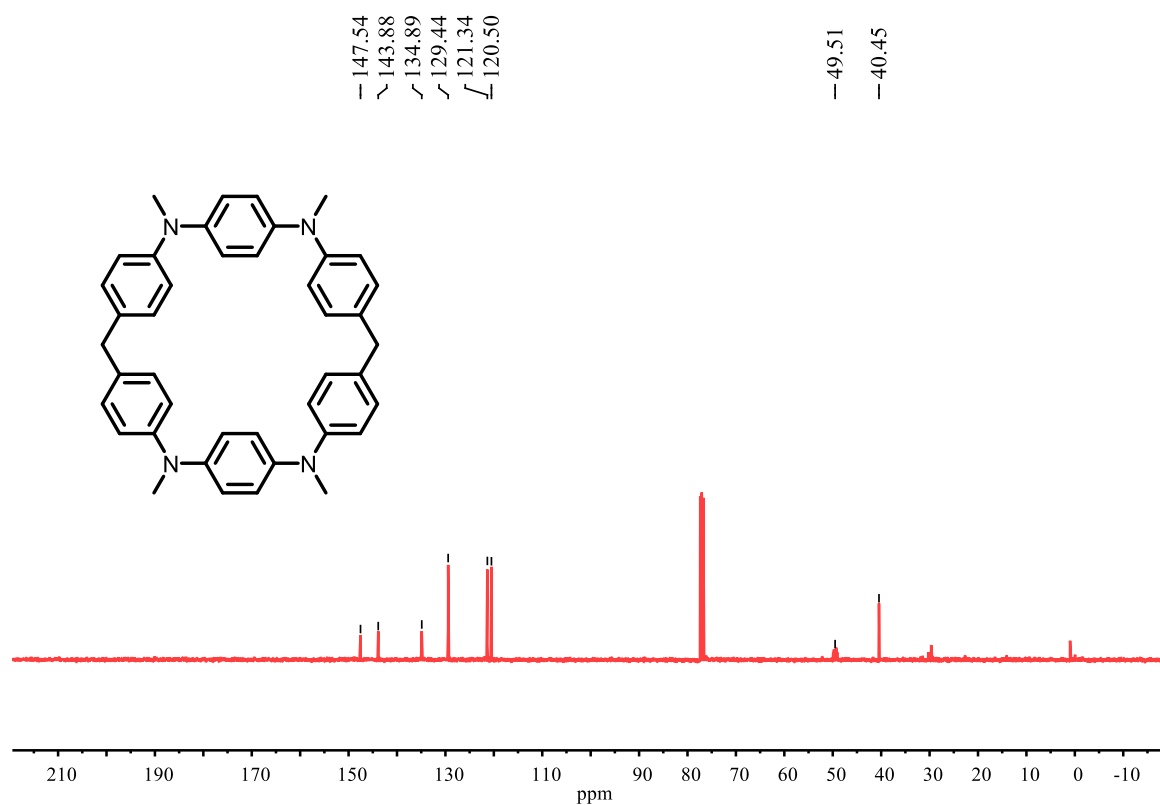

Fig. S8.  $^{13}\text{C}$  NMR spectrum of **MeAn[2]** measured in CDCl<sub>3</sub> at 25 °C.

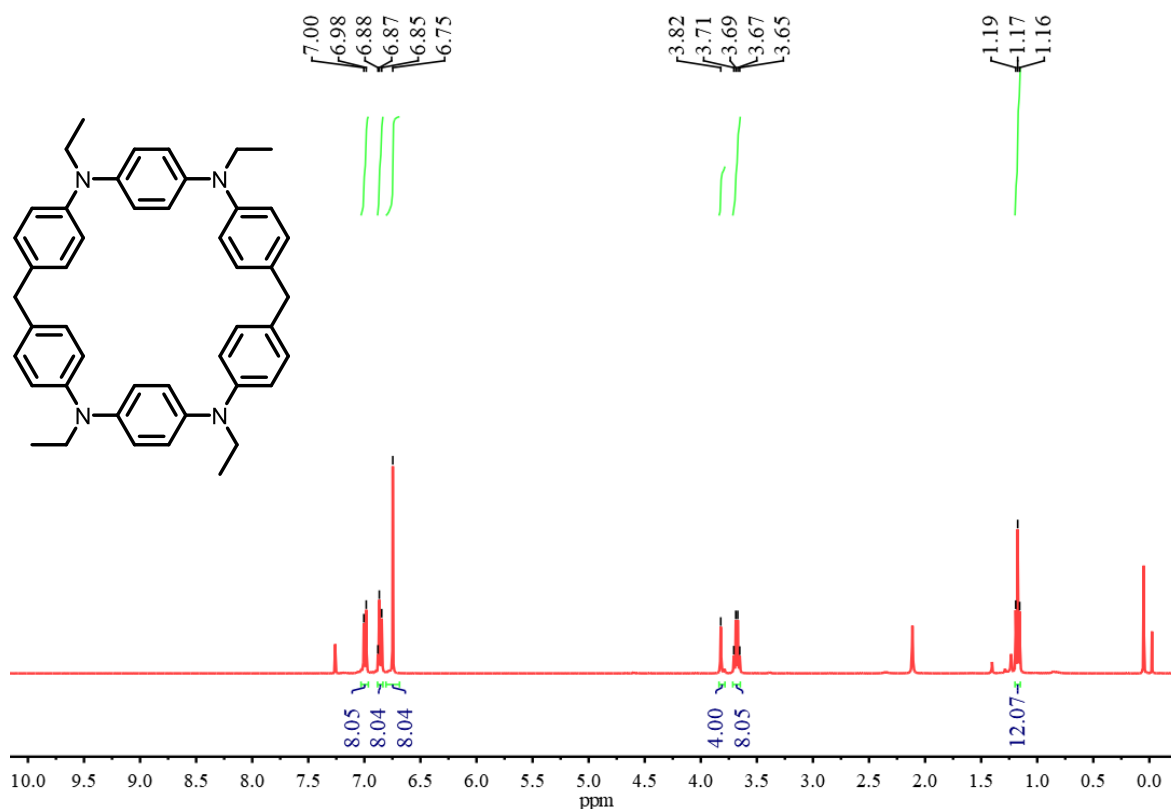

Fig. S9.  $^1\text{H}$  NMR spectrum of **EtAn[2]** measured in  $\text{CDCl}_3$  at 25 °C.

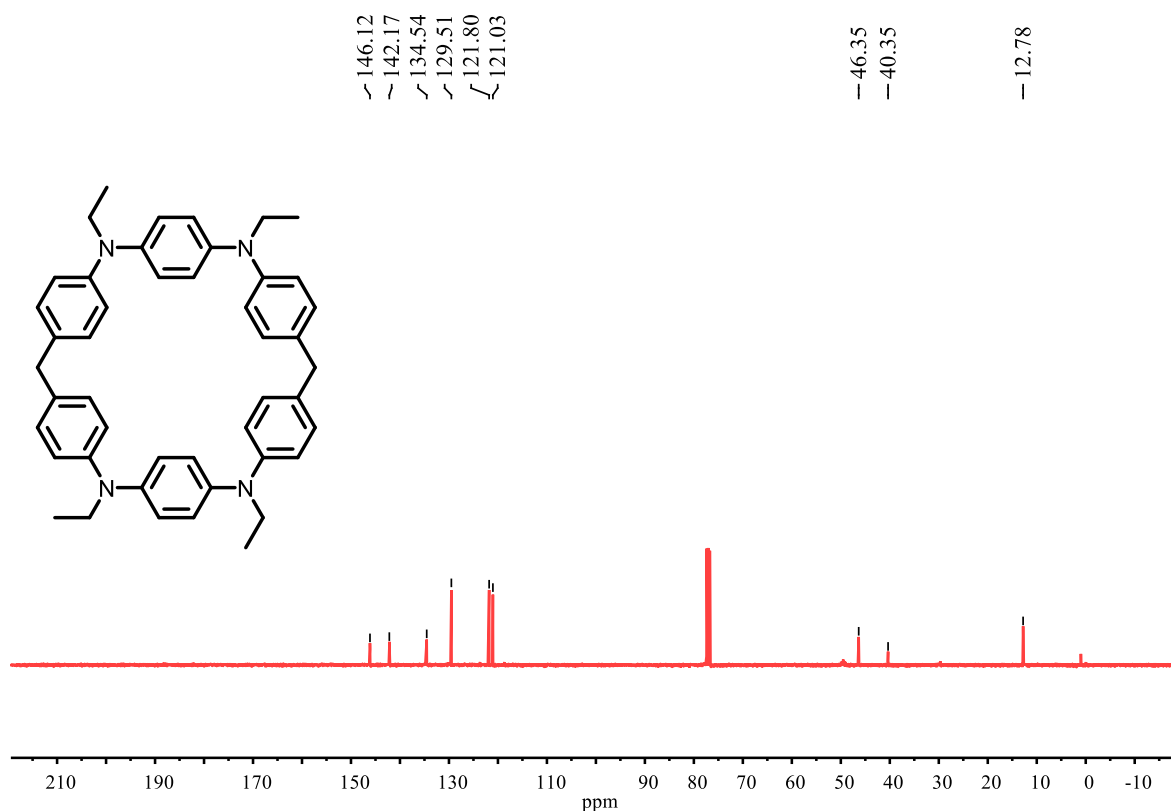

Fig. S10.  $^{13}\text{C}$  NMR spectrum of **EtAn[2]** measured in  $\text{CDCl}_3$  at 25 °C.

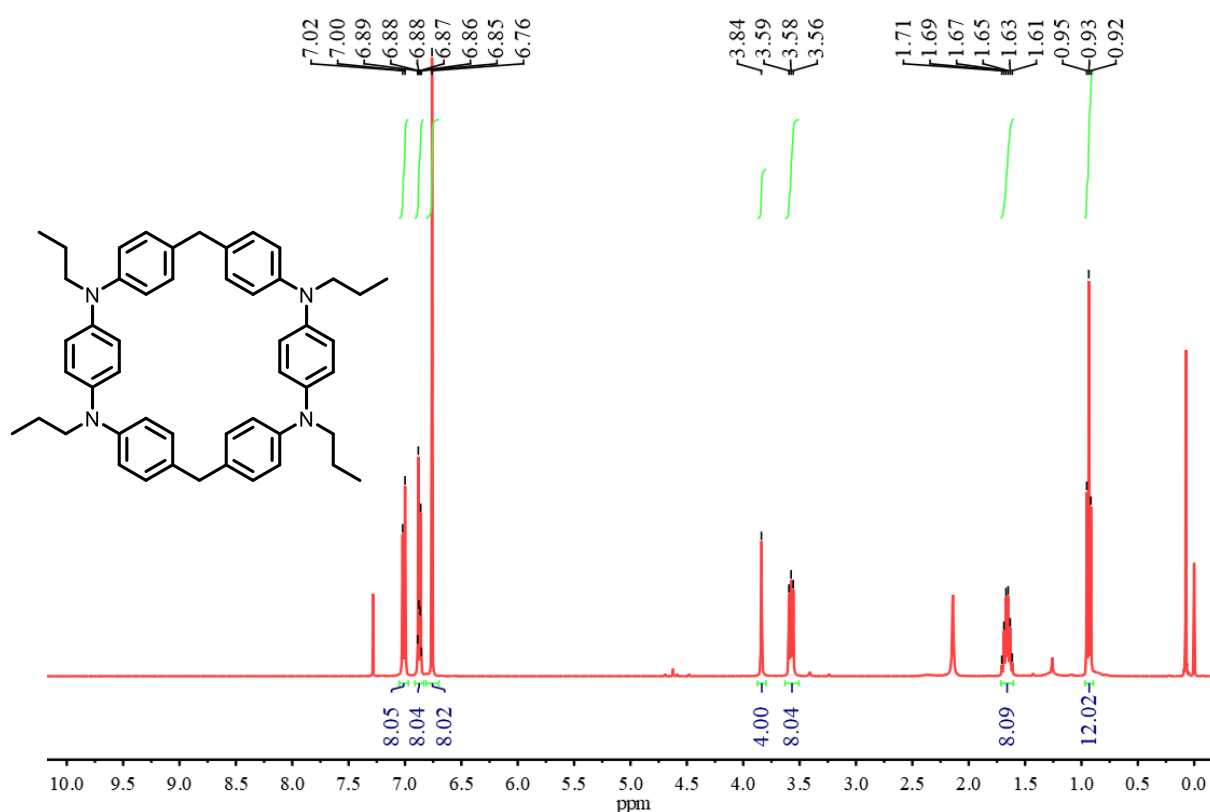

Fig. S11. <sup>1</sup>H NMR spectrum of **PrAn[2]** measured in CDCl<sub>3</sub> at 25 °C.

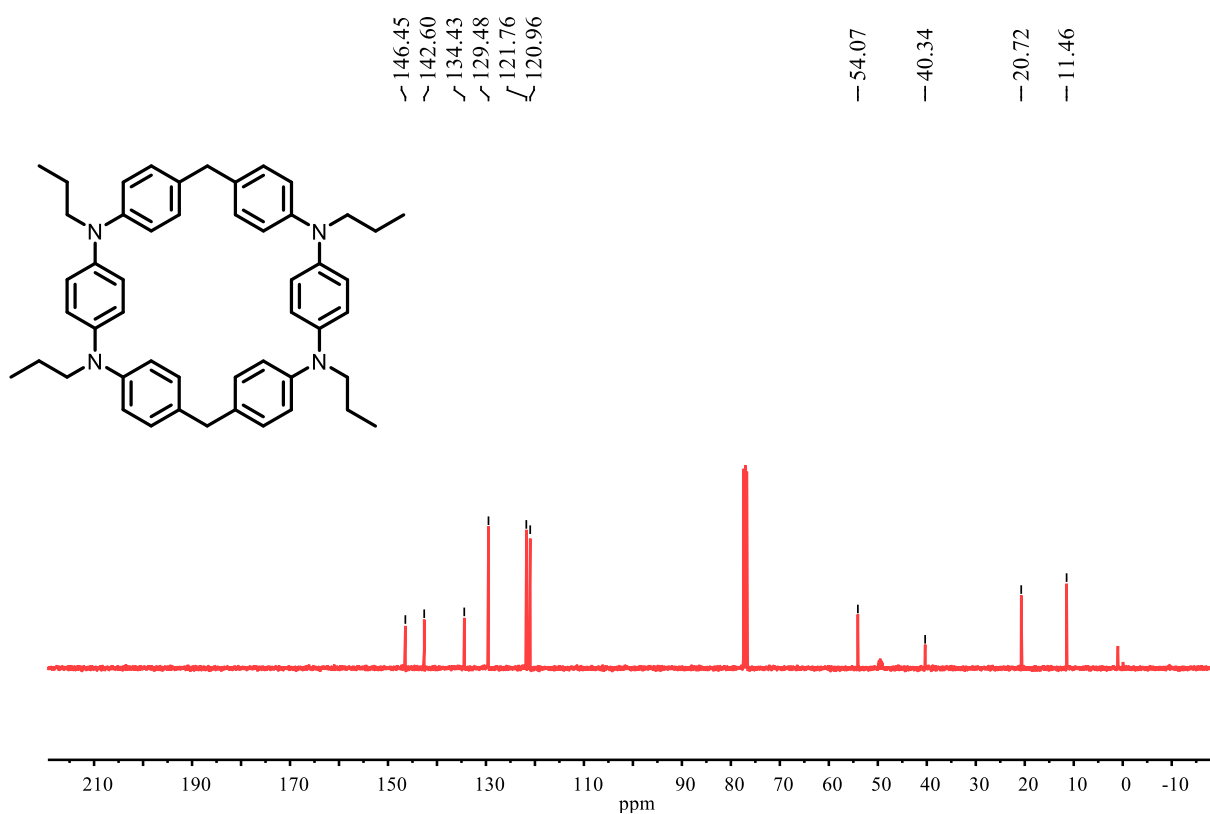

Fig. S12. <sup>13</sup>C NMR spectrum of **PrAn[2]** measured in CDCl<sub>3</sub> at 25 °C.



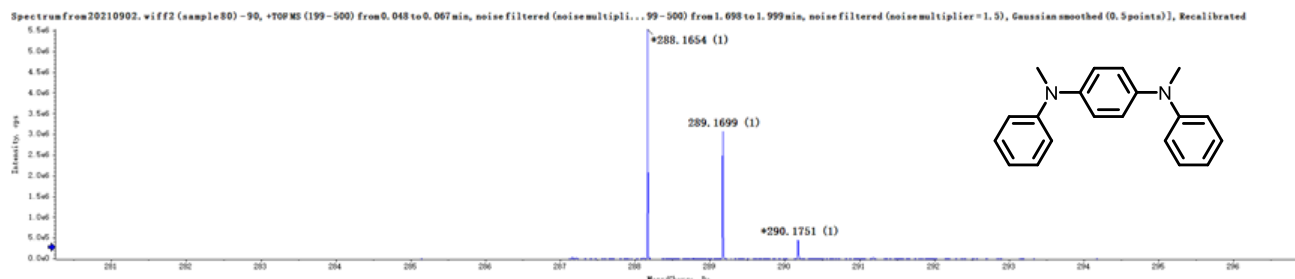

Fig. S13. HRMS spectrum of **MeAn**.

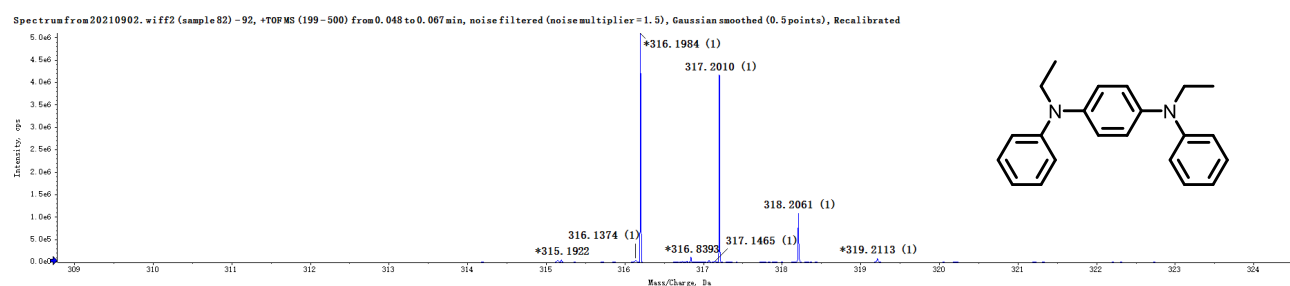

Fig. S14. HRMS spectrum of **EtAn**.

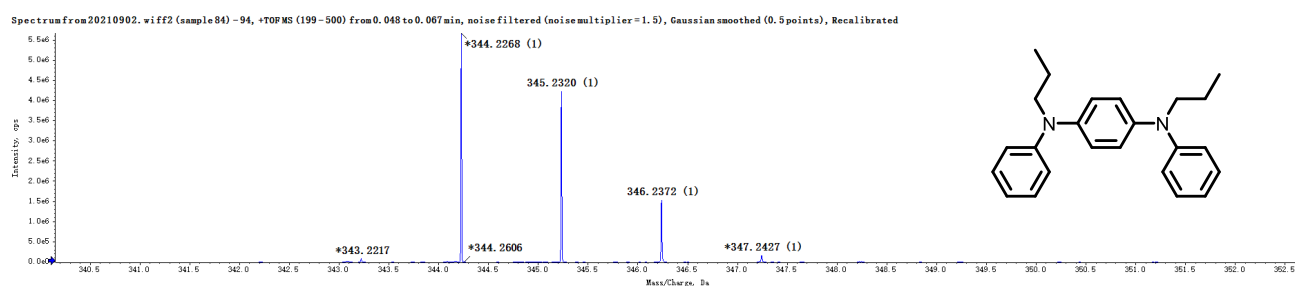

Fig. S15. HRMS spectrum of **PrAn**.

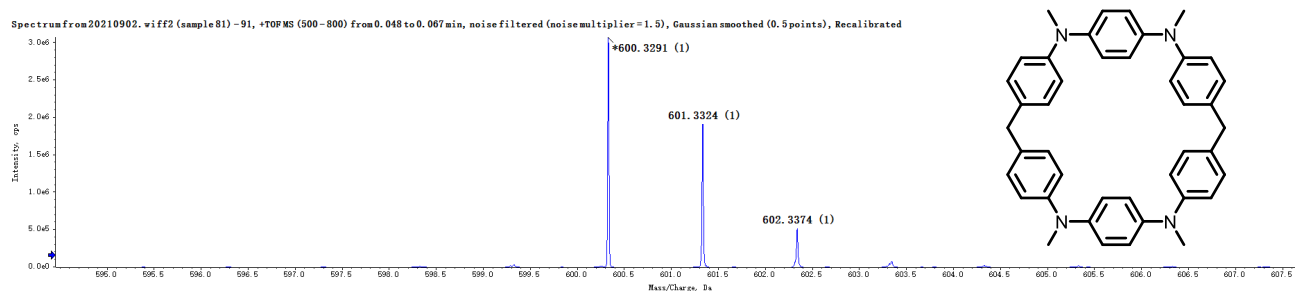

Fig. S16. HRMS spectrum of **MeAn[2]**.

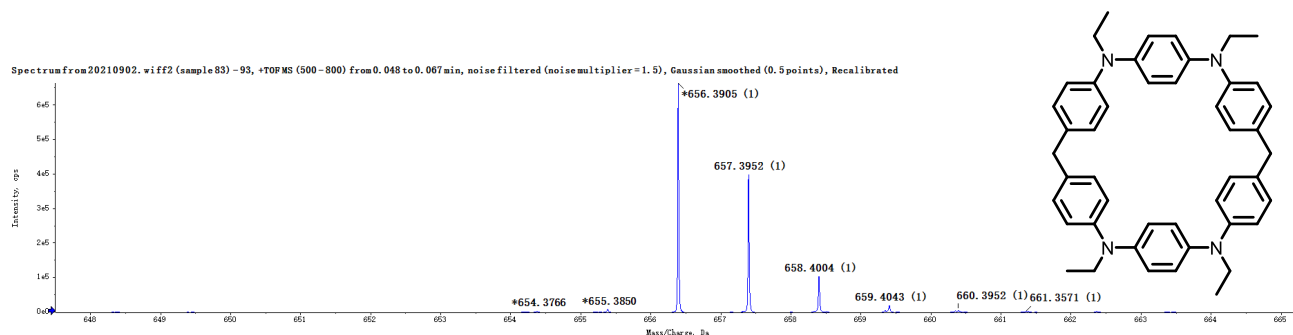

Fig. S17. HRMS spectrum of EtAn[2].

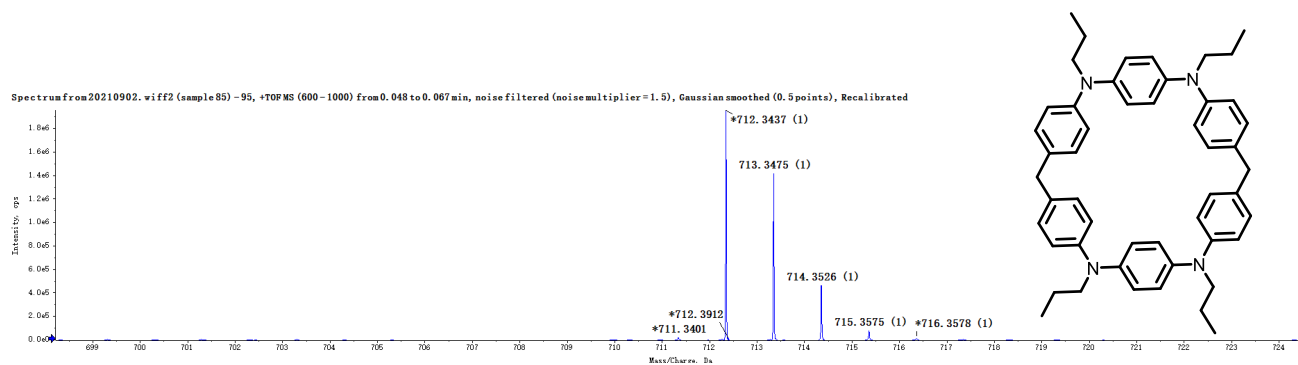

Fig. S18. HRMS spectrum of PrAn[2].

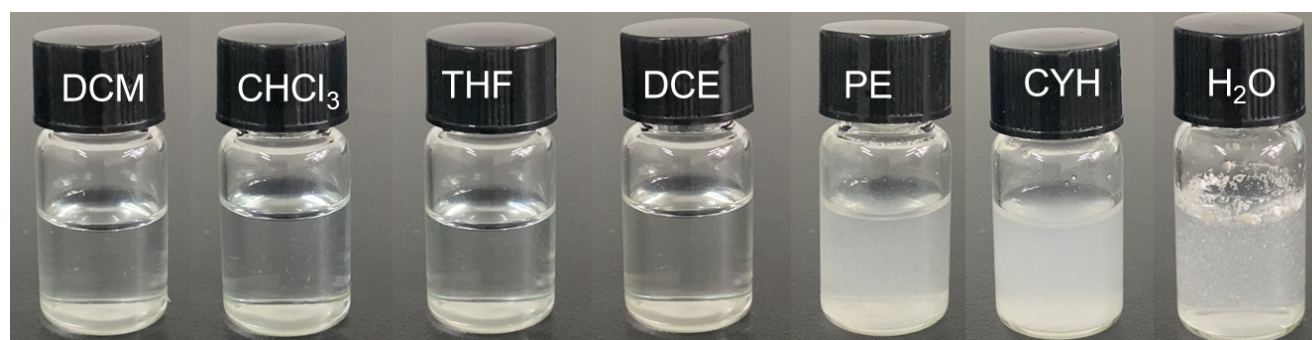

Fig. S19. Solubility testing of EtAn[2] in various organic solvents and water, where 5 mg of EtAn[2] was put into 2 mL dichloromethane(DCM), chloroform( $\text{CHCl}_3$ ), tetrahydrofuran(THF), 1,2-dichloroethane(DCE), petroleum ether(PE), cyclohexane(CYH) and water, respectively, and was sonicated for 30 min at room temperature.

## N<sub>2</sub> adsorption/desorption isotherms of P-Ns

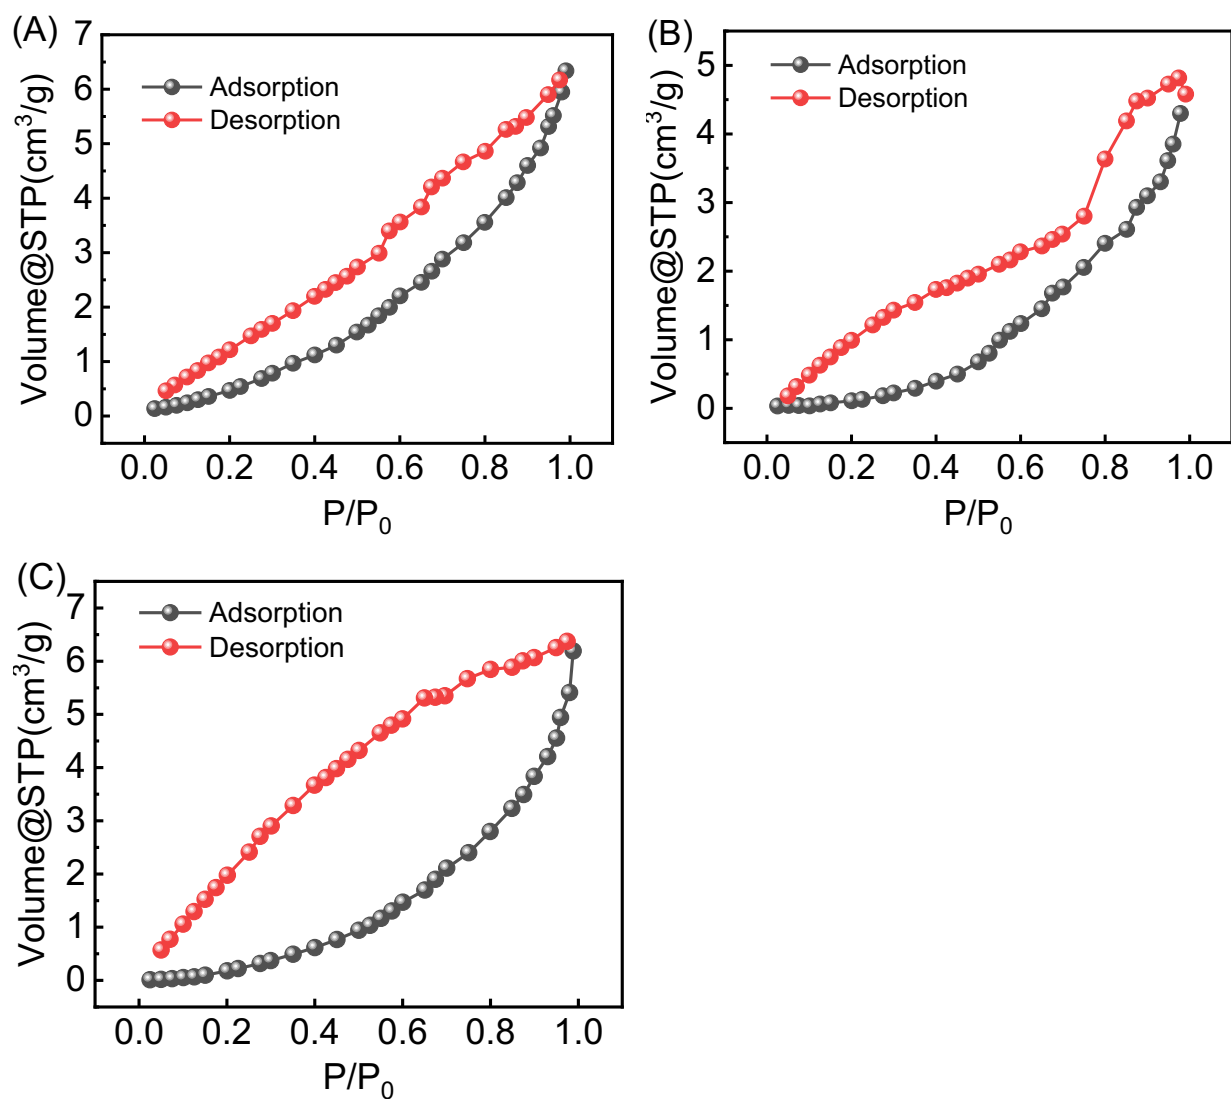

Fig. S20. N<sub>2</sub> adsorption/desorption isotherm of (A) **P-A**, (B) **P-B** and (C) **P-C**.

**Table S2.** Porosity parameters of the **An[2]**s in the present study.

|         | S <sub>BET</sub><br>(m <sup>2</sup> g <sup>-1</sup> ) | Pore Volume<br>(cm <sup>3</sup> g <sup>-1</sup> ) | Half Pore Width<br>(nm) |
|---------|-------------------------------------------------------|---------------------------------------------------|-------------------------|
| MeAn[2] | 10.452                                                | 0.010                                             | 2.520                   |
| EtAn[2] | 11.856                                                | 0.012                                             | 1.876                   |
| PrAn[2] | 12.569                                                | 0.010                                             | 1.347                   |
| P-A     | 10.891                                                | 0.012                                             | 4.737                   |
| P-B     | 10.596                                                | 0.010                                             | 1.877                   |
| P-C     | 12.156                                                | 0.013                                             | 5.057                   |

## Cyclic voltammograms experiments

In order to study the oxidation reduction potential of the precursors(Ans) and An[2]s, CVs of 1.0 mM solutions of all compounds in MeCN with 0.1 M TBAPF<sub>6</sub> electrolyte were measured( scan rate =100 mV s<sup>-1</sup>) as shown in Fig. S27. In the pseudo-reversible / irreversible electrochemical process, the relationship between the peak potential and the scan rate can be expressed according to the method demonstrated by Laviron's model<sup>[3]</sup> (1), which can be used to calculate the number of electronic transfers. At higher scan rate (0.9 -10 V s<sup>-1</sup>), a good linear relationship between the logarithm of the scan rate (log v) and the redox potentials was found as shown in Fig. S27.

$$E_{pa} = E^0 + \left( \frac{2.303RT}{\alpha nF} \right) \log \left( \frac{RTk}{\alpha nF} \right) + \left( \frac{2.303RT}{\alpha nF} \right) \log v \quad (1)$$

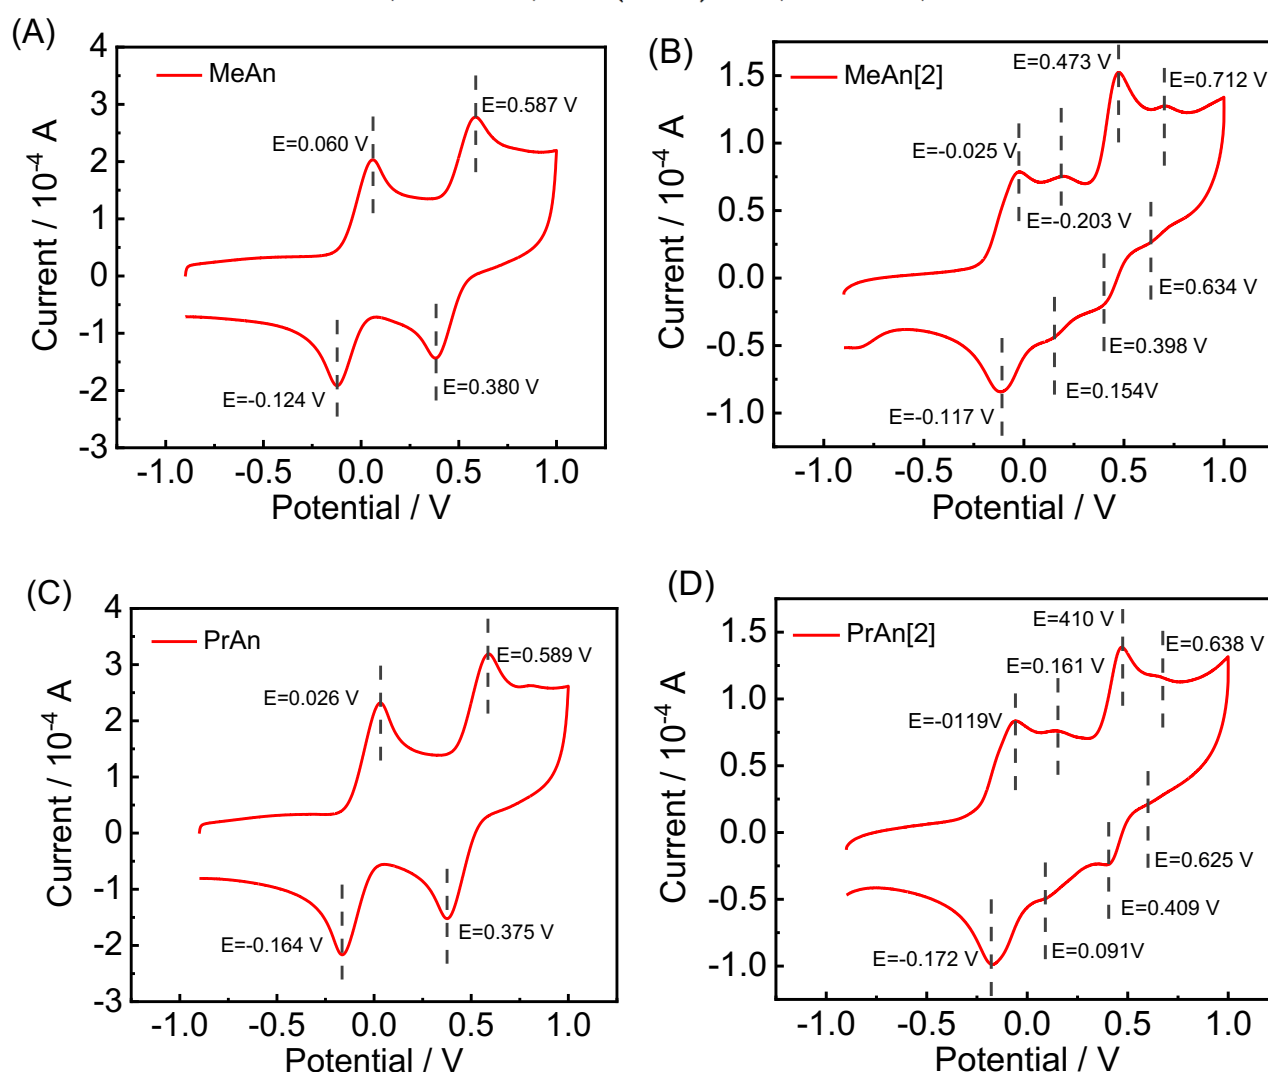

Fig. S21. CVs of 1.0 mM solutions of (A) **MeAn**, (B) **MeAn[2]**, (C) **PrAn** and (D) **PrAn[2]** in MeCN with 0.1 M TBAPF<sub>6</sub> electrolyte.

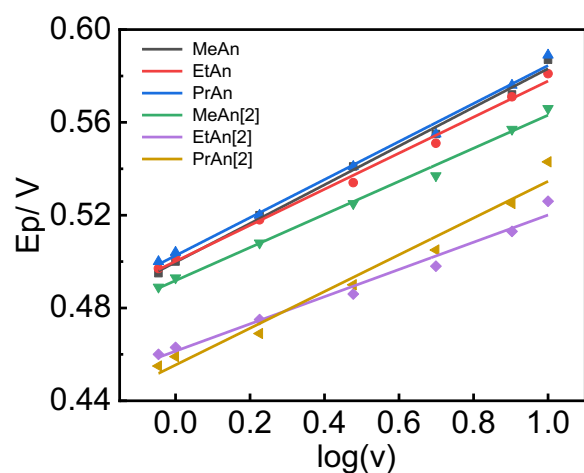

|         | regression equation             | n      |
|---------|---------------------------------|--------|
| MeAn    | $y=0.0834x+3.8618$ $R^2=0.9938$ | 1.4174 |
| EtAn    | $y=0.0777x+6.6418$ $R^2=0.9933$ | 1.5224 |
| PrAn    | $y=0.0852x+4.8937$ $R^2=0.9919$ | 1.4434 |
| MeAn[2] | $y=0.0713x+0.4918$ $R^2=0.9928$ | 1.6590 |
| EtAn[2] | $y=0.0587x+0.4614$ $R^2=0.9768$ | 2.0301 |
| PrAn[2] | $y=0.0792x+0.4554$ $R^2=0.9721$ | 1.4939 |

Fig. S22. Calibration curve based on the change of the logarithm of the scan rate ( $0.1-10 \text{ V s}^{-1}$ ) versus the peak potential ( $E_p$ ).

**Table S3.** Element composition and content in polymers.

|                            | C[%]   | N[%]   | H[%]  | S[%]   | O[%]   | Total[%] |
|----------------------------|--------|--------|-------|--------|--------|----------|
| Sulfanilamide <sup>a</sup> | 41.815 | 16.250 | 4.650 | 18.620 | -----  | 81.335   |
| benzoic acid <sup>b</sup>  | -----  | -----  | ----- | -----  | 26.200 | 26.200   |
| P-A <sup>c</sup>           | 77.320 | 8.360  | 5.833 | 0.000  | 0.547  | 92.06    |

a, CHNS Mode, and Sulfanilamide is used Sulfanilamide as the reference standard

b, O Mode, and Sulfanilamide is used benzoic acid as the reference standard

c, Taking polymer P-A as an example, the composition and content of its element was determined. The total content of the four elements of C, N, O, and H is about 92%, possibly due to that  $\text{BF}_3$  remaining during the sample preparation process.

## Field emission scanning electron microscope(FESEM) of An[2]s

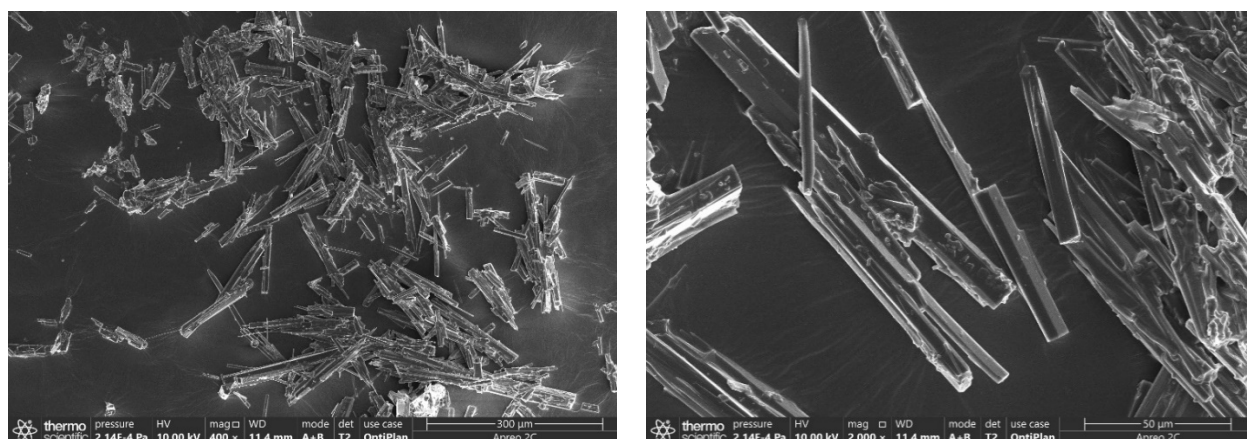

Fig. S23. Scanning electron microscopy images of MeAn[2].

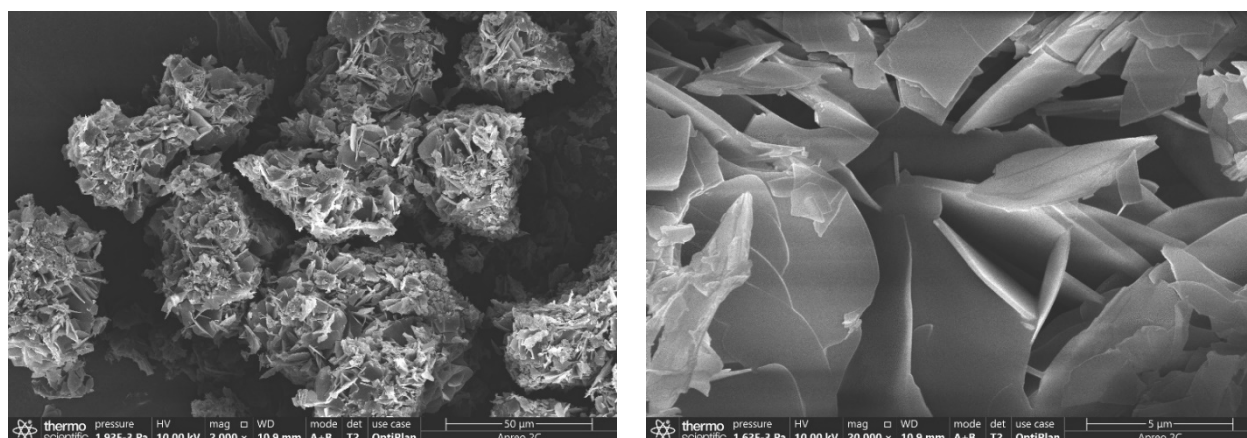

Fig. S24. Scanning electron microscopy images of EtAn[2].

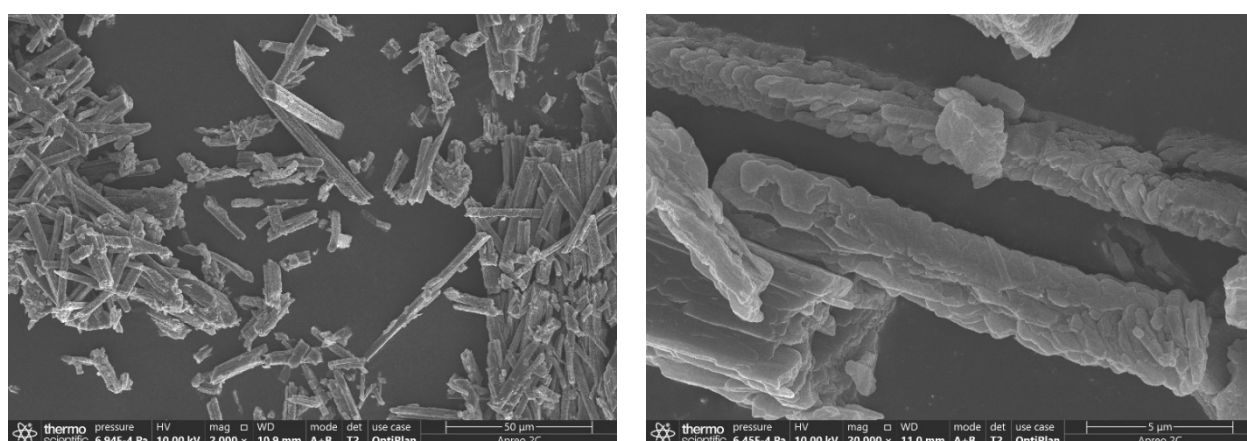

Fig. S25. Scanning electron microscopy images of PrAn[2].

# FT-IR spectra of An[2]s and their polymers

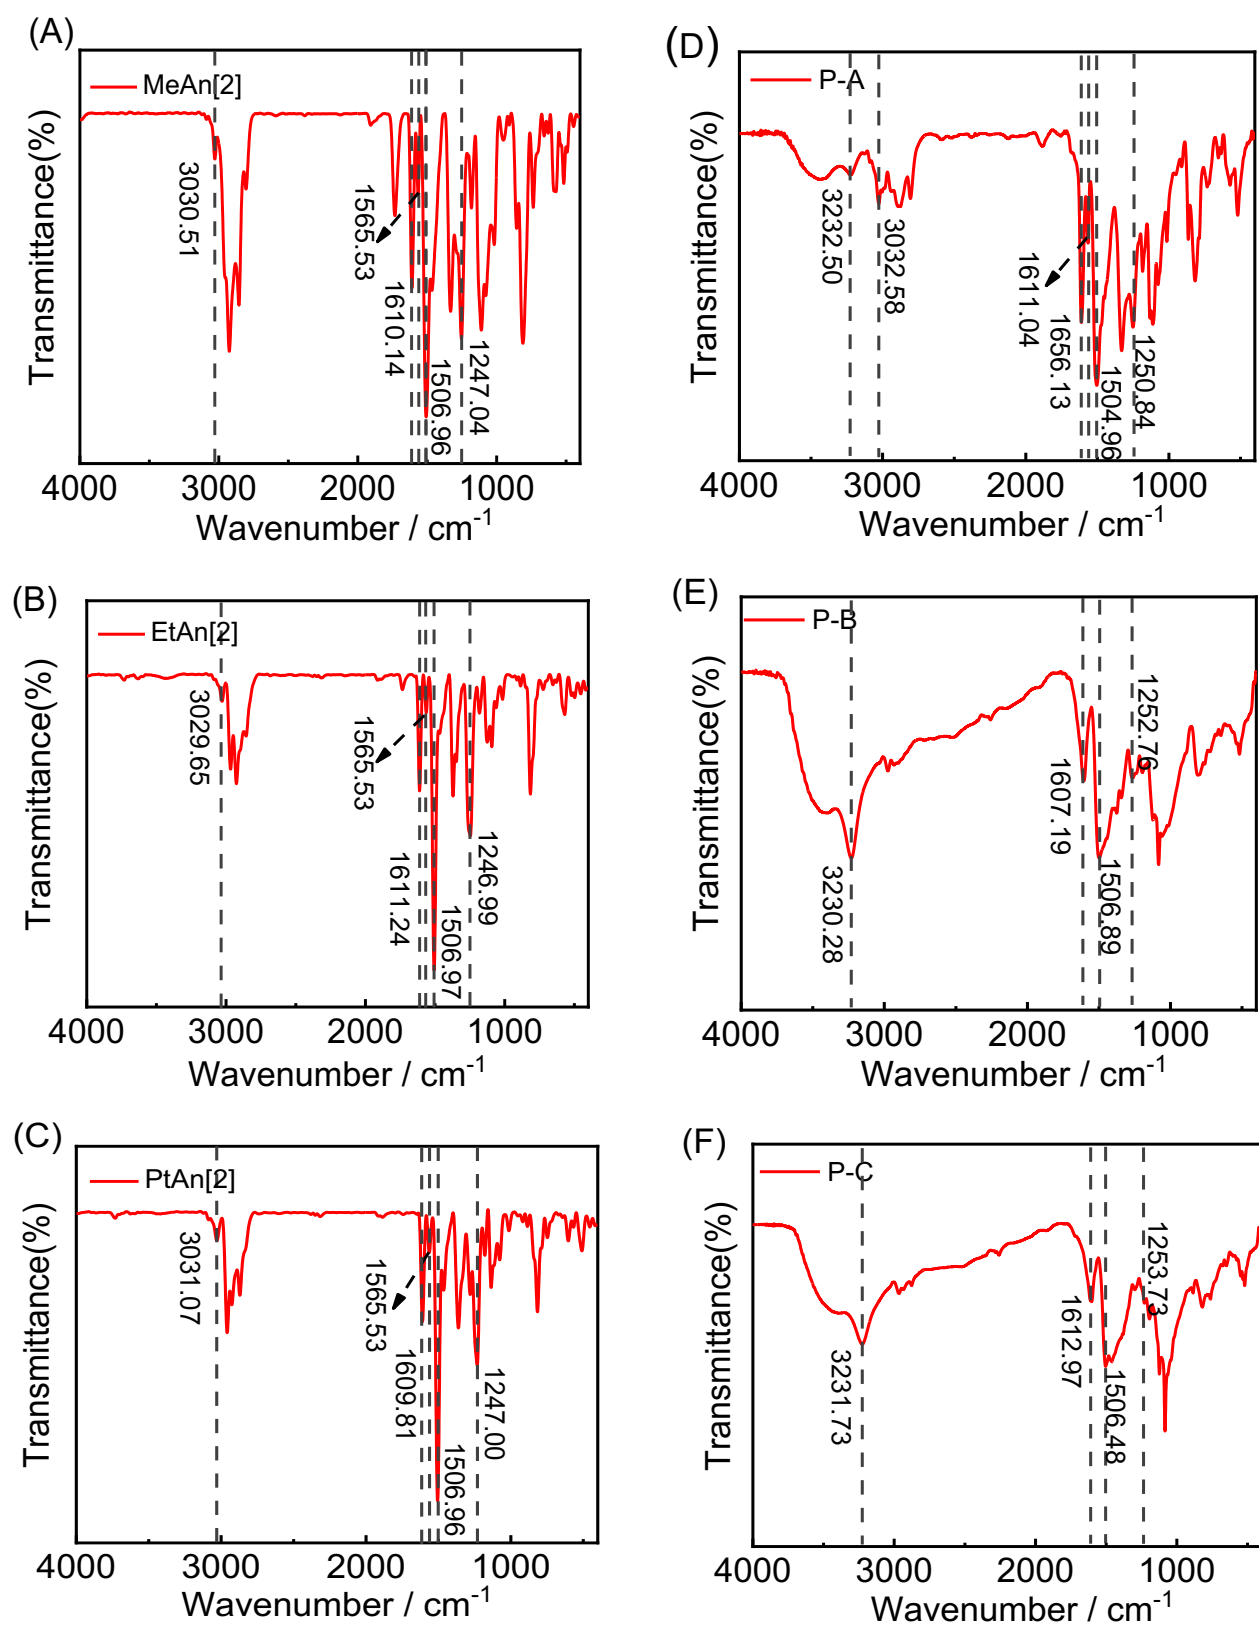

Fig. S26. FT-IR spectra of (A) **MeAn[2]** (B) **Et An[2]**, (C) **Pr An[2]**, (D) **P-A**, (E) **P-B** and (F) **P-C**.

---

Powder X-ray diffraction pattern of An[2]s

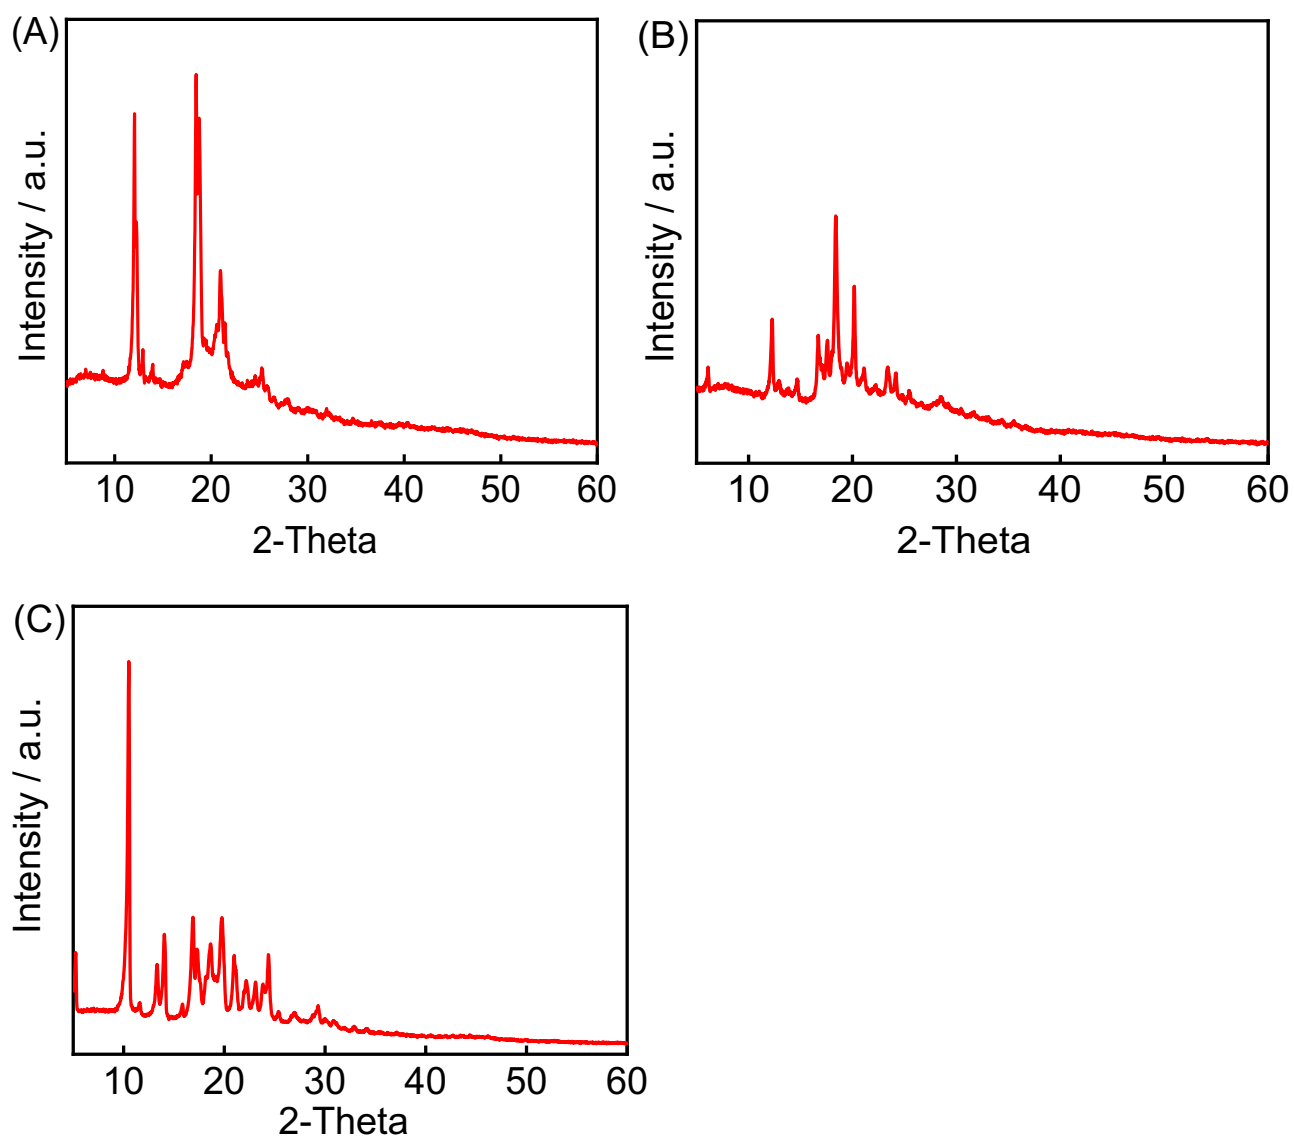

Fig. S27. X-ray powder diffractogram of (A) MeAn[2] , (B) EtAn[2] and (C) PrAn[2].



### 3. UV-vis and fluorescence spectra of An[2]s

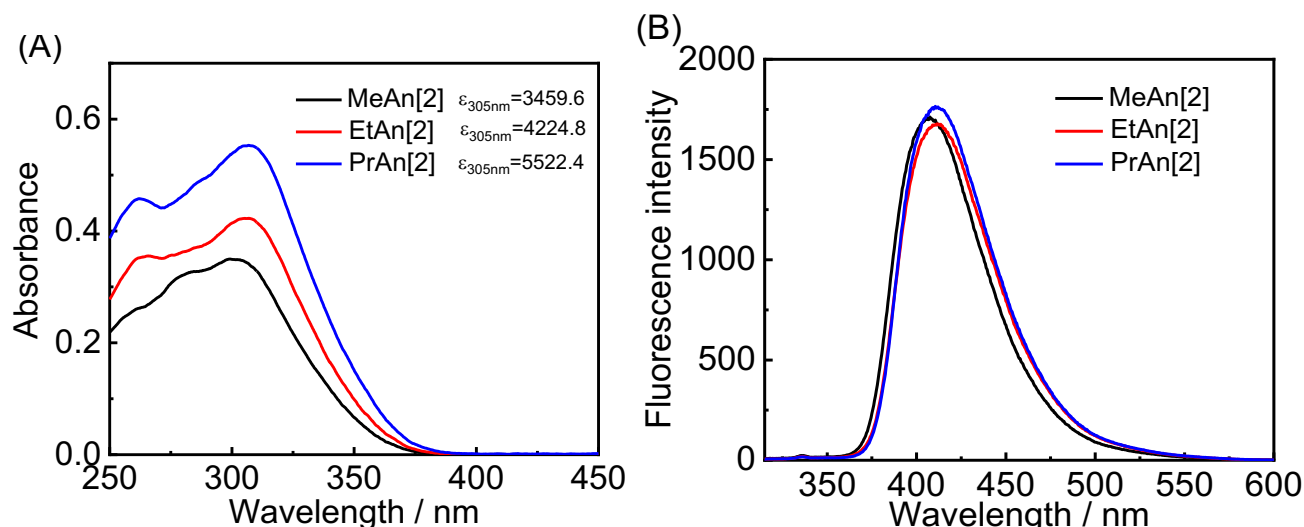

Fig. S28. (A) UV-vis absorption spectra of **MeAn[2]** (100  $\mu\text{M}$ ), **EtAn[2]** (100  $\mu\text{M}$ ) and **PrAn[2]** (100  $\mu\text{M}$ ) in THF at 25 °C. (B) Fluorescence spectra of **MeAn[2]** (10  $\mu\text{M}$ ), **EtAn[2]** (10  $\mu\text{M}$ ) and **PrAn[2]** (10  $\mu\text{M}$ ) in THF at 25 °C,  $\lambda_{\text{ex}} = 305$  nm.

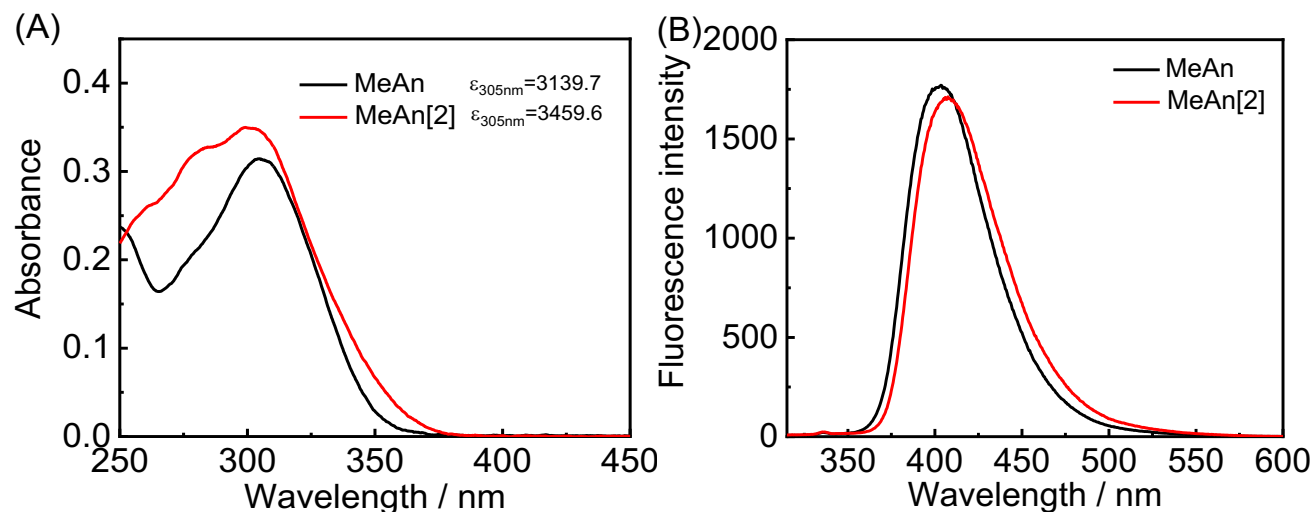

Fig. S29. (A) UV/vis spectra of **MeAn** (100  $\mu\text{M}$ ) and **MeAn[2]** (100  $\mu\text{M}$ ) in THF at 25 °C, (B) Fluorescence spectra of **MeAn** (10  $\mu\text{M}$ ) and **MeAn[2]** (10  $\mu\text{M}$ ) in THF at 25 °C,  $\lambda_{\text{ex}} = 305$  nm.

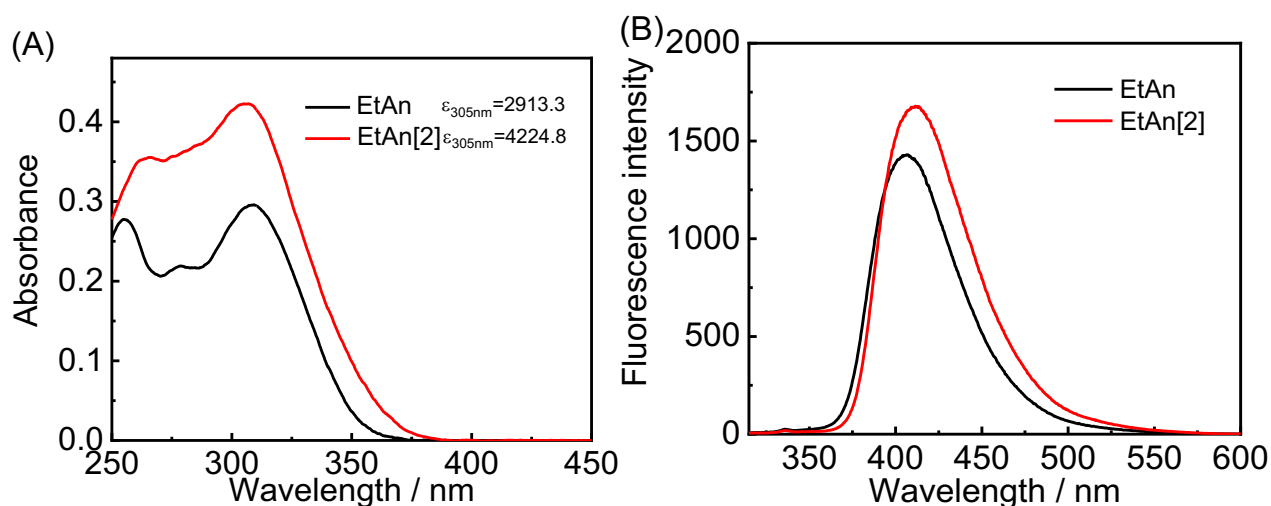

Fig. S30. (A) UV/vis spectra of **EtAn** (100  $\mu\text{M}$ ) and **EtAn[2]** (100  $\mu\text{M}$ ) in THF at 25 °C, (B) Fluorescence spectra of **EtAn** (10  $\mu\text{M}$ ) and **EtAn[2]** (10  $\mu\text{M}$ ) in THF at 25 °C,  $\lambda_{\text{ex}}$ =305 nm.

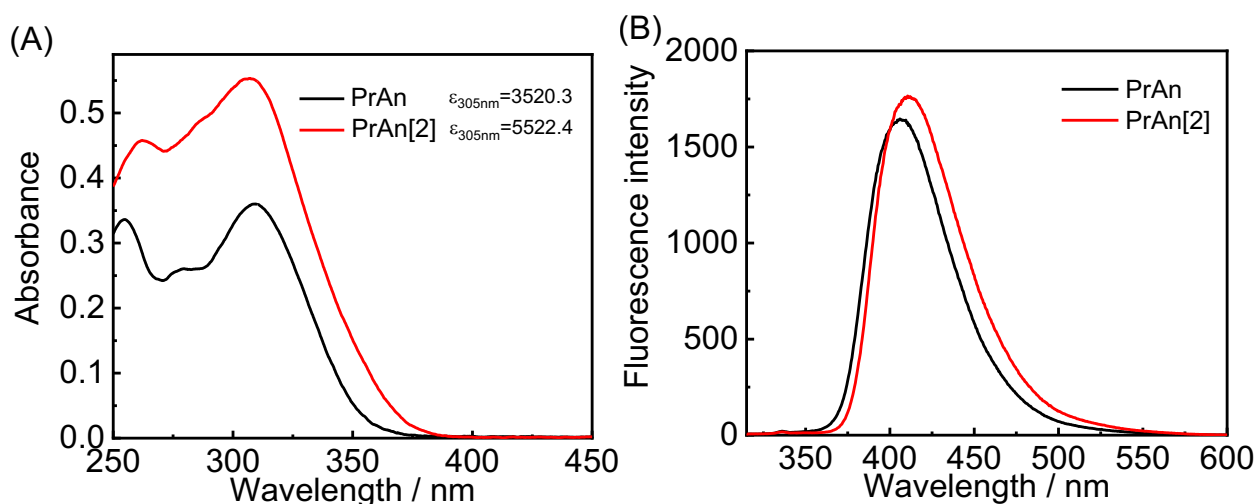

Fig. S31. (A) UV/vis spectra of **PrAn** (100  $\mu\text{M}$ ) and **PrAn[2]** (100  $\mu\text{M}$ ) in THF at 25 °C, (B) Fluorescence spectra of **PrAn** (10  $\mu\text{M}$ ) and **PrAn[2]** (10  $\mu\text{M}$ ) in THF at 25 °C,  $\lambda_{\text{ex}}$ =305 nm.

#### 4. DFT calculation

Density functional theory (DFT) at B3LYP functional and a 6-31G(d) basis sets were adopted to optimize the structures of the ground state.<sup>[1][2]</sup> The optimized structures are shown in Fig. S24.

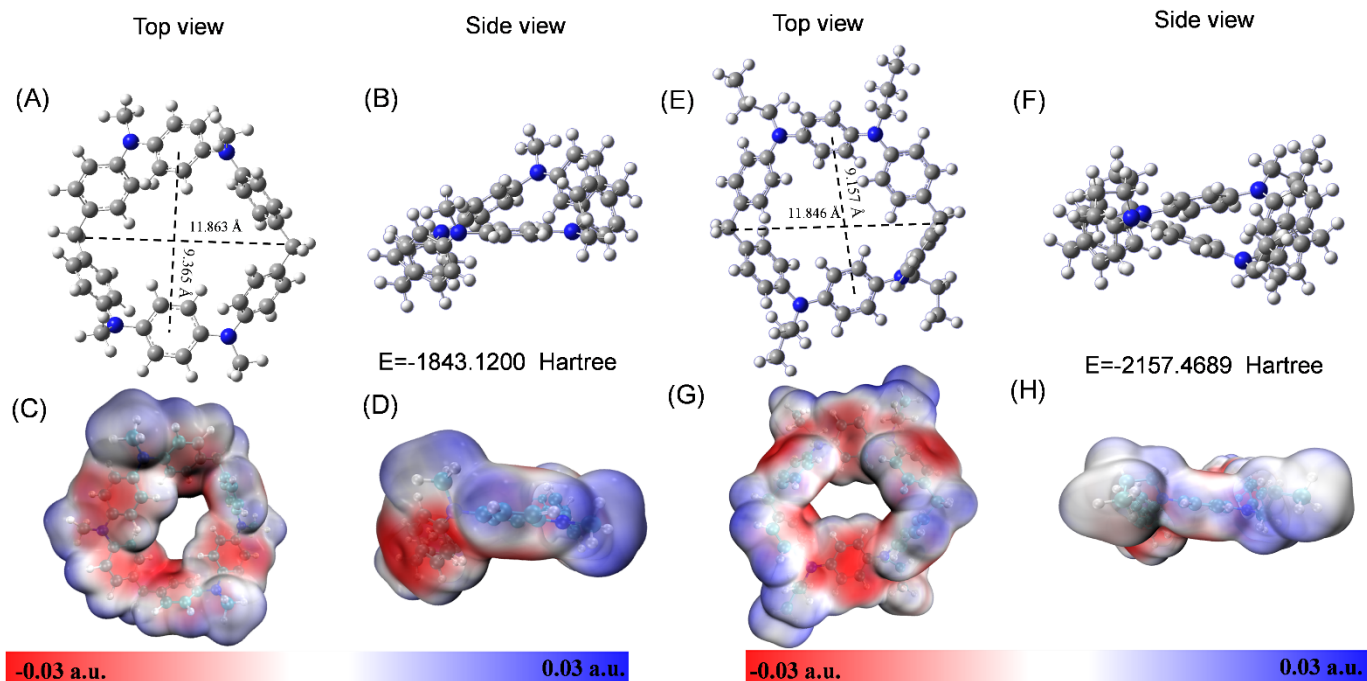

Fig. S32. Optimized structures of (A-D)**MeAn[2]** and (E-H) **PrAn[2]** by DFT at B3LYP/6-31G(d) level. (A and E) Top view and (B and F) Side view of optimized structures of **MeAn[2]** and **PrAn[2]**, respectively. (C and G) Top view and (D and H) Side view of electrostatic potential surface calculated for **MeAn[2]** and **PrAn[2]**, respectively displayed on the isosurface of the electron density at a value of  $0.02 \text{ e bohr}^{-3}$ , with the potential from positively charged regions colored in blue and negatively charged regions colored in red.

## 5. Iodine vapor capture by An[2]s and P-Ns

The iodine vapor sorption capacities of **An[2]s** were determined by means of gravimetric measurements. The polymer samples were pre-weighed and kept in small weighing vials, which were located in a sealed container with iodine pellets kept at the bottom. The container was degassed and kept at 348.15 K at ambient pressure. The iodine uptake was determined at different time intervals. The values of uptake capacity are the average values of at least two experiments.<sup>[4]</sup>

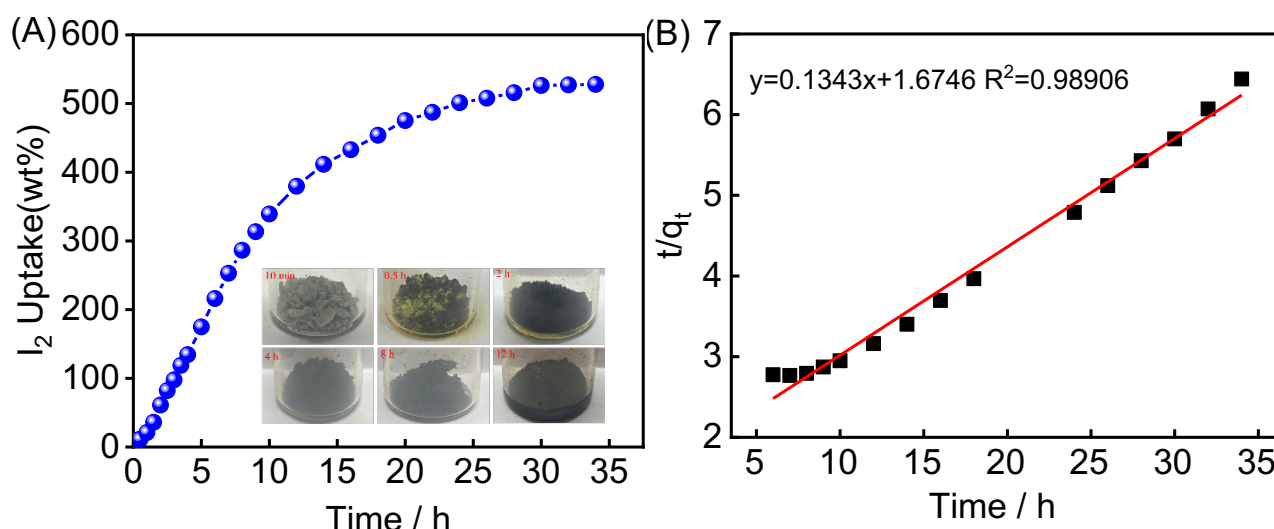

Fig. S33. (A) Time-dependent  $I_2$  vapor uptake profiles of **MeAn[2]** at 348.15 K. Inset: The photographs of **MeAn[2]** upon  $I_2$  vapor uptake at varying time intervals. (B) Line fitting with Pseudo-second-order models for adsorption kinetics data.

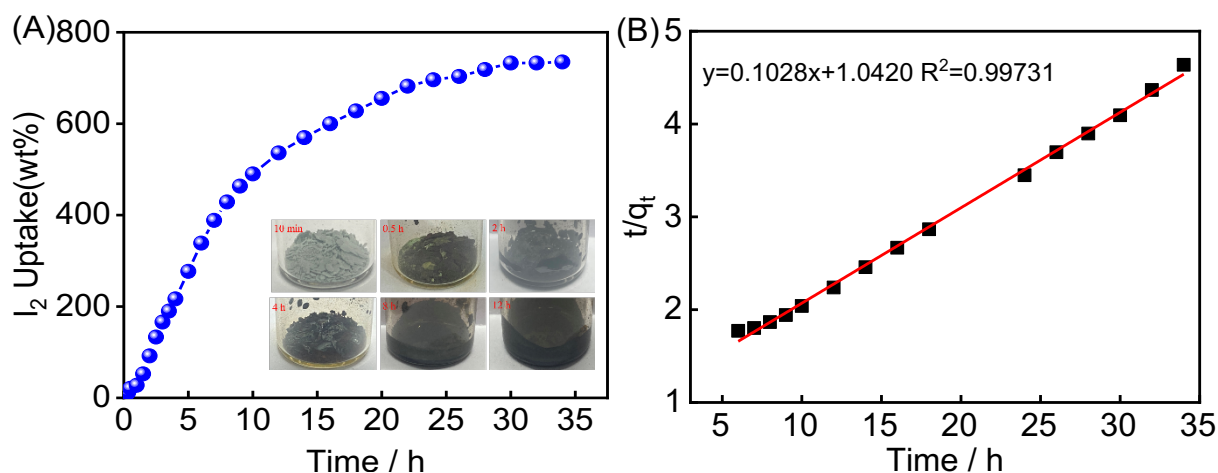

Fig. S34. (A) Time-dependent  $I_2$  vapor uptake profiles of **EtAn[2]** at 348.15 K. Inset: The photographs of **EtAn[2]** upon  $I_2$  vapor uptake at varying time intervals. (B) Line fitting with Pseudo-second-order models for adsorption kinetics data.

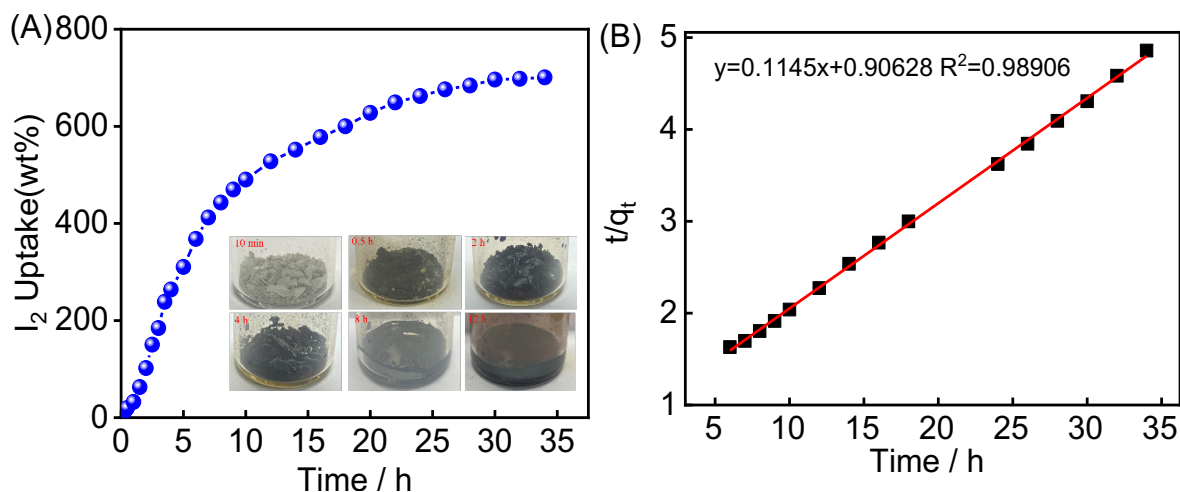

Fig. S35. (A) Time-dependent  $I_2$  vapor uptake profiles of PrAn[2] at 348.15 K. Inset: The photographs of **MeAn[2]** upon  $I_2$  vapor uptake at varying time intervals. (B) Line fitting with Pseudo-second-order models for adsorption kinetics data.

Table S4. Kinetic data corresponding to the iodine vapor adsorption by various **An[2]s** and ACs.

| Entry              | Slope                 | Intercept             | qe                    | $k_{obs}$                 | $R^2$                 |
|--------------------|-----------------------|-----------------------|-----------------------|---------------------------|-----------------------|
|                    |                       |                       |                       | ( $g\ g^{-1}\ min^{-1}$ ) |                       |
| MeAn[2]            | 0.1343                | 1.6746                | 5.2800                | 0.0108                    | 0.9891                |
| EtAn[2]            | 0.1028                | 1.0420                | 7.3521                | 0.0101                    | 0.9973                |
| PrAn[2]            | 0.1145                | 0.9890                | 7.0125                | 0.0133                    | 0.9993                |
| ACs <sup>[5]</sup> | 0.4549 <sup>[5]</sup> | 3.5402 <sup>[5]</sup> | 2.1982 <sup>[5]</sup> | 0.0585 <sup>[5]</sup>     | 0.9997 <sup>[5]</sup> |

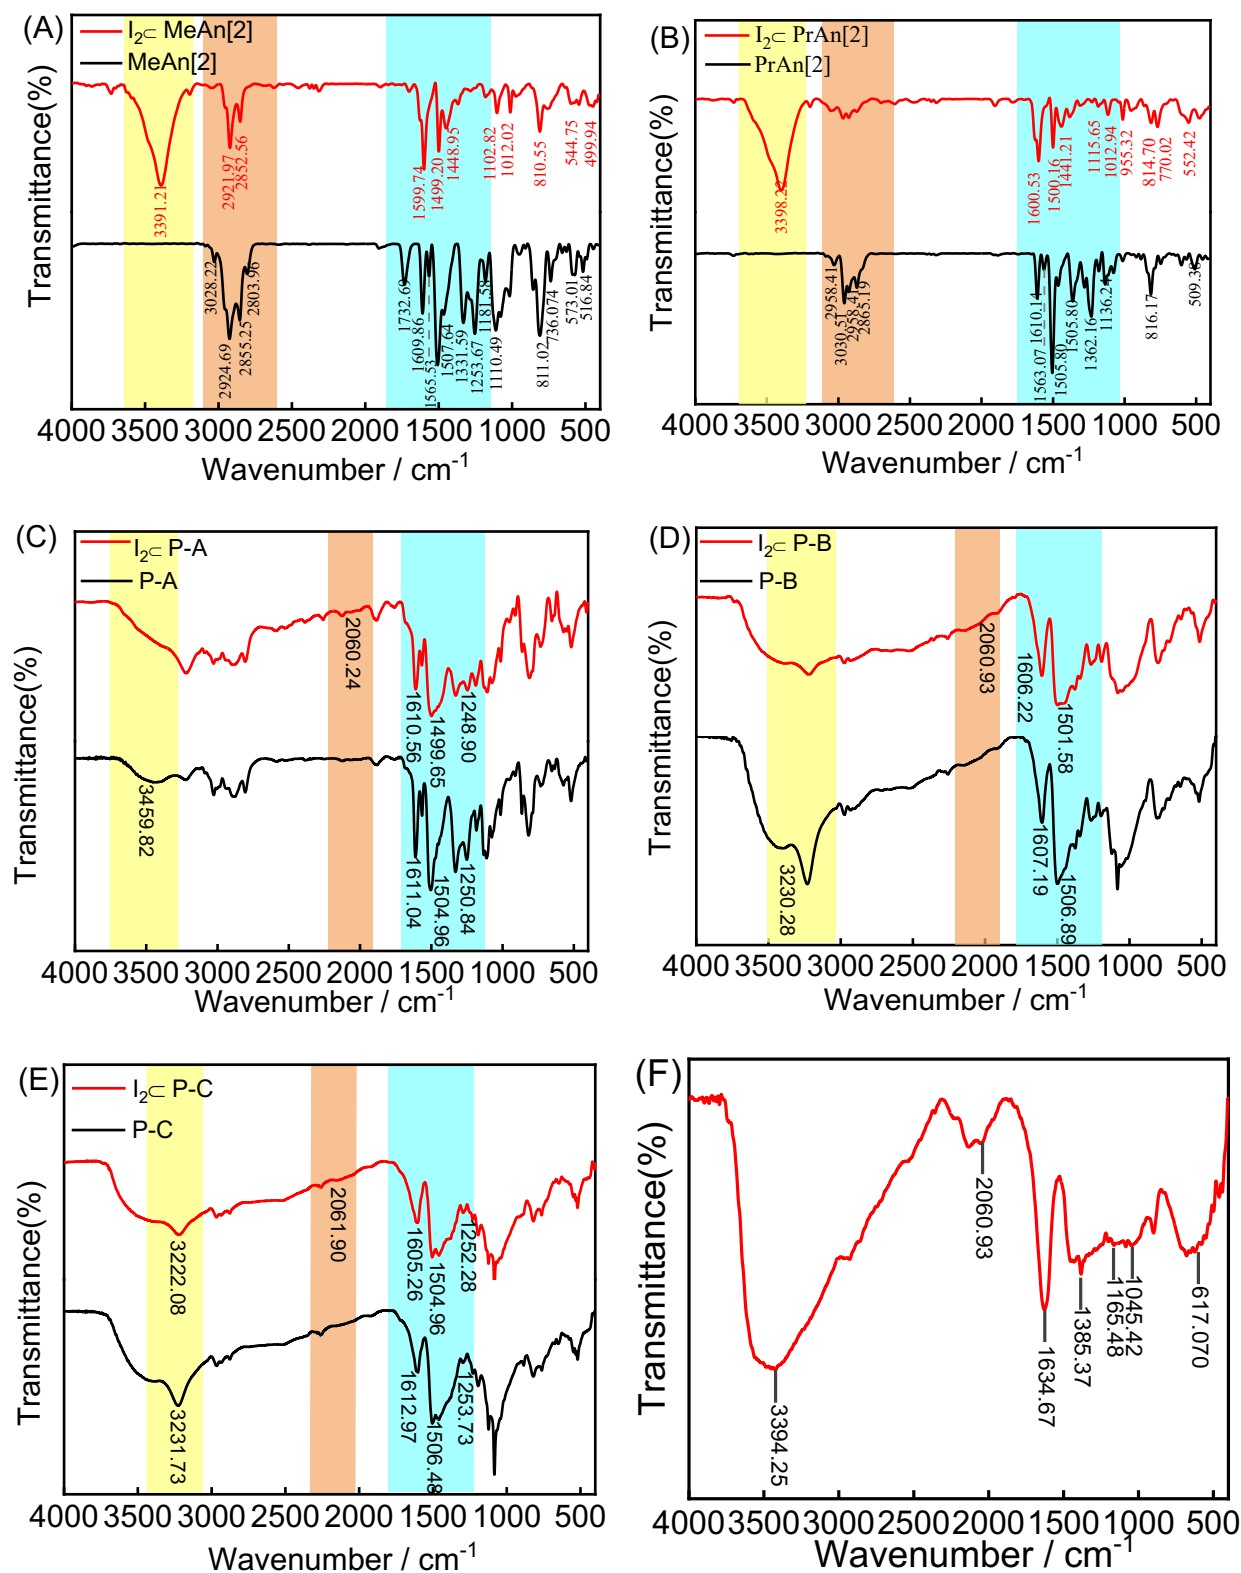

Fig. S36. FT-IR spectra of (A) **MeAn[2]** and  $I_2$ -**MeAn[2]**, (B) **PrAn[2]** and  $I_2$ -**PrAn[2]**, (C) **P-A** and  $I_2$ -**P-A**, (D) **P-B** and  $I_2$ -**P-B**, (E) **P-C** and  $I_2$ -**P-C**, (F) iodine.

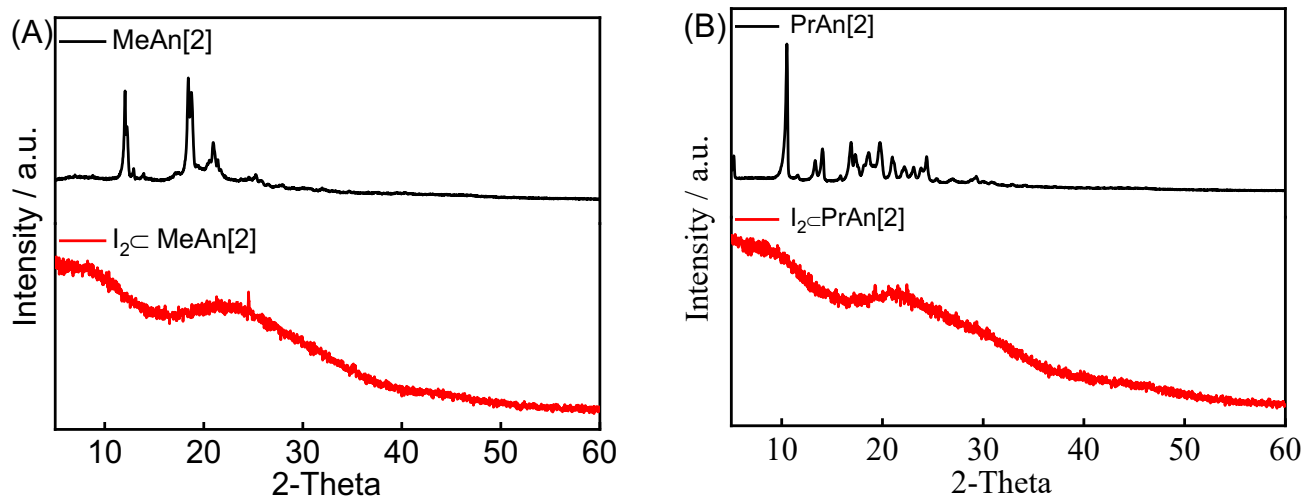

Fig. S37. X-ray powder diffractogram (A) **MeAn[2]** and I<sub>2</sub>-**MeAn[2]**, (B) **PrAn[2]** and I<sub>2</sub>-**PrAn[2]**.

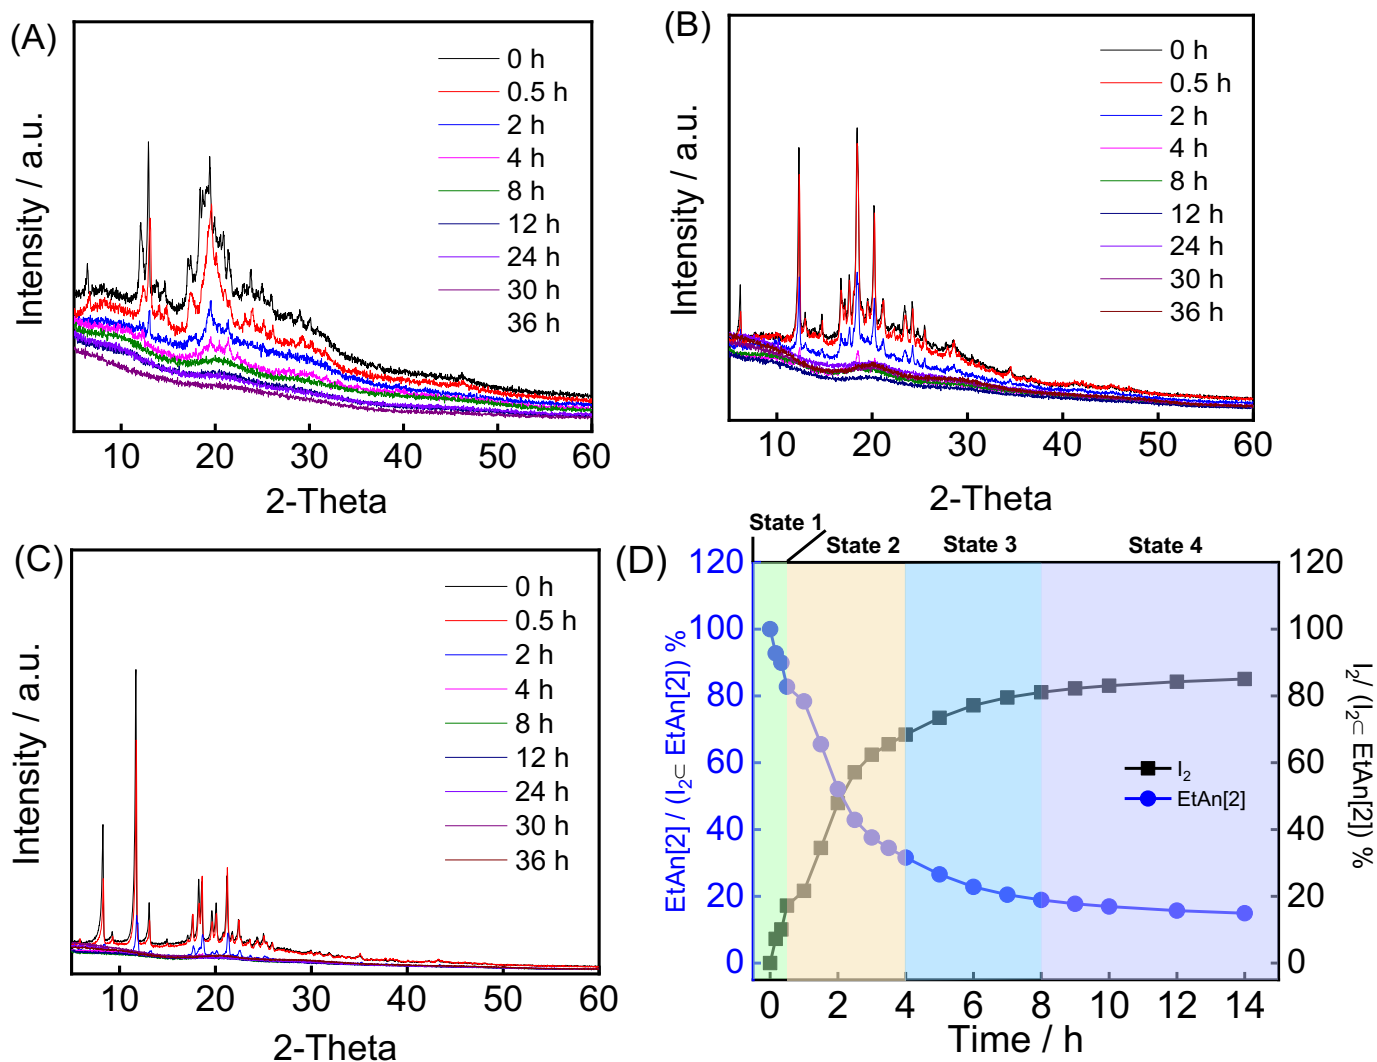

Fig. S38. XRD patterns of (A) **MeAn[2]**, (B) **EtAn[2]**, and (C) **PrAn[2]** after capturing iodine at different time. (D) The process of adsorption of iodine vapor by EtAn[2] can be divided into four stages, labeled as stages 1 to 4, which could be assigned to the surface adsorption, diffusion/reverse dissolution, reverse dissolution, and adsorption equilibrium stages, respectively.

Table S5. Iodine vapor adsorption capacities of macrocycles and Aniline-based materials from 2017-2022.

| Materials | Iodine uptake capacity (g g <sup>-1</sup> ) | Type                     | vapor adsorption conditions | Reference                                  |
|-----------|---------------------------------------------|--------------------------|-----------------------------|--------------------------------------------|
| EtAn[2]   | 7.35                                        | Anilino macrocycle       | 75 °C 30 h                  | This work                                  |
| PrAn[2]   | 7.01                                        | Anilino macrocycle       | 75 °C 30 h                  | This work                                  |
| BPPOC     | 5.64                                        | Porous Organic Cage      | 75 °C 30 h                  | J. Am. Chem. Soc. 2022, 144, 12390–12399   |
| MeAn[2]   | 5.28                                        | Anilino macrocycle       | 75 °C 30 h                  | This work                                  |
| MeBID[3]  | 5.12                                        | Bisindole [3]arenes      | 75 °C 20 h                  | CCS Chem 2021,3, 1945–1953                 |
| P-A       | 4.91                                        | Aniline-based polymer    | 75 °C 45 h                  | This work                                  |
| TTPPA     | 4.90                                        | Aniline-based polymer    | 76.85 °C 35 h               | J. Mater. Chem. A, 2018,6, 2808-2816       |
| CalPOF-1  | 4.77                                        | Calix[4]resorcinarene    | 75 °C 30 h                  | ACS Sustain. Chem. Eng., 2018, 6, 17402.   |
| TTPB      | 4.43                                        | Aniline-based polymer    | 77 °C 40 h                  | J. Mater. Chem. A, 2017,5, 7612-7617       |
| CMP-LS5   | 4.40                                        | Aniline-based polymer    | 80 °C 8 h                   | Polym. Chem., 2019,10, 2608-2615           |
| P-B       | 4.17                                        | Aniline-based polymer    | 75 °C 45 h                  | This work                                  |
| P-C       | 4.01                                        | Aniline-based polymer    | 75 °C 45 h                  | This work                                  |
| C[4]P-BTP | 3.38                                        | Calix[4]pyrrole          | 75 °C 4 h                   | Angew. Chem. 2021, 133, 2–10               |
| BPy-Cage  | 3.23                                        | Bipyridine Cage          | 75 °C 15 h                  | J. Am. Chem. Soc. 2022, 144, 1, 113–117    |
| TTDAB     | 3.13                                        | Aniline-based polymer    | 76.85 °C 35 h               | J. Mater. Chem. A, 2018,6, 2808-2816       |
| CalP4-Li  | 3.12                                        | Calix[4]arenes           | 75 °C 10 h                  | Chem. Mater. 2017, 29, 8968.               |
| C[4]P-TTP | 2.99                                        | Calix[4]pyrrole          | 75 °C 4 h                   | Angew. Chem. 2021, 133, 2–10               |
| AzoPPN    | 2.90                                        | Porphyrin-phthalocyanine | 75 °C 10 h                  | Chem. Eur. J., 2016, 22, 11863.            |
| CalP3-Li  | 2.48                                        | Calix[4]arenes           | 75 °C 10 h                  | Chem. Mater. 2017, 29, 8968.               |
| CMP-LS6   | 2.44                                        | Aniline-based polymer    | 80 °C 8 h                   | Polym. Chem., 2019,10, 2608-2615.          |
| PAN-FPP5  | 2.2                                         | Pillar[5]arenes          | 70 °C 24 h                  | Ind. Eng. Chem. Res. 2020, 59, 3269.       |
| CMP-4     | 2.08                                        | Pillar[6]arenes          | 75 °C 20 h                  | Angew. Chem. Int. Ed., 2021, 60, 8967.     |
| C[4]P-DPP | 1.89                                        | Calix[4]pyrrole          | 75 °C 4 h                   | Angew. Chem. 2021, 133, 2–10               |
| CalP2-Li  | 1.08                                        | Calix[4]arenes           | 75 °C 10 h                  | Chem. Mater. 2017, 29, 8968.               |
| G-TP5     | 0.67                                        | Terphen[n]arenes         | 75 °C 1 h                   | Angew. Chem. Int. Ed. 2019, 58, 3885 –3889 |



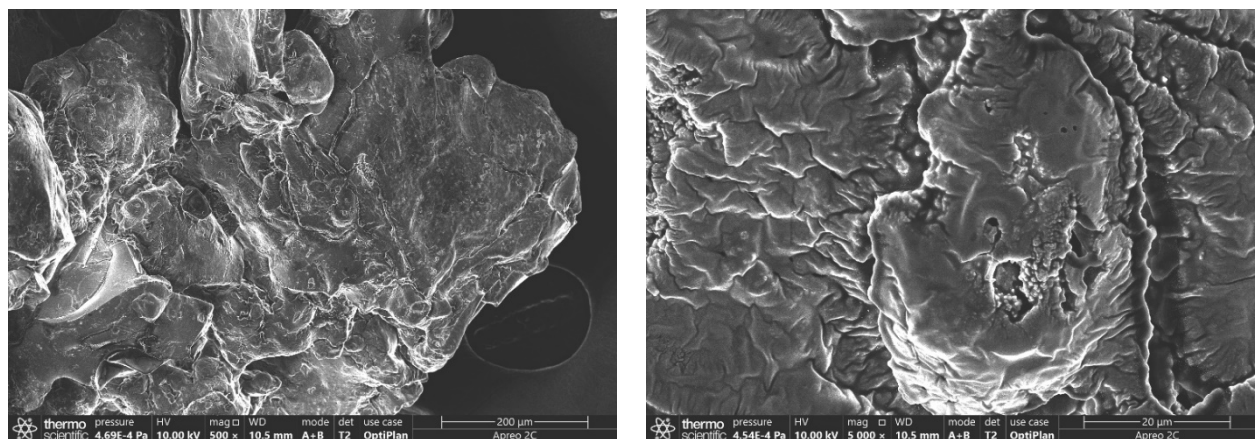

Fig. S39. Scanning electron microscopy images of l<sub>2</sub>c **MeAn**[2].

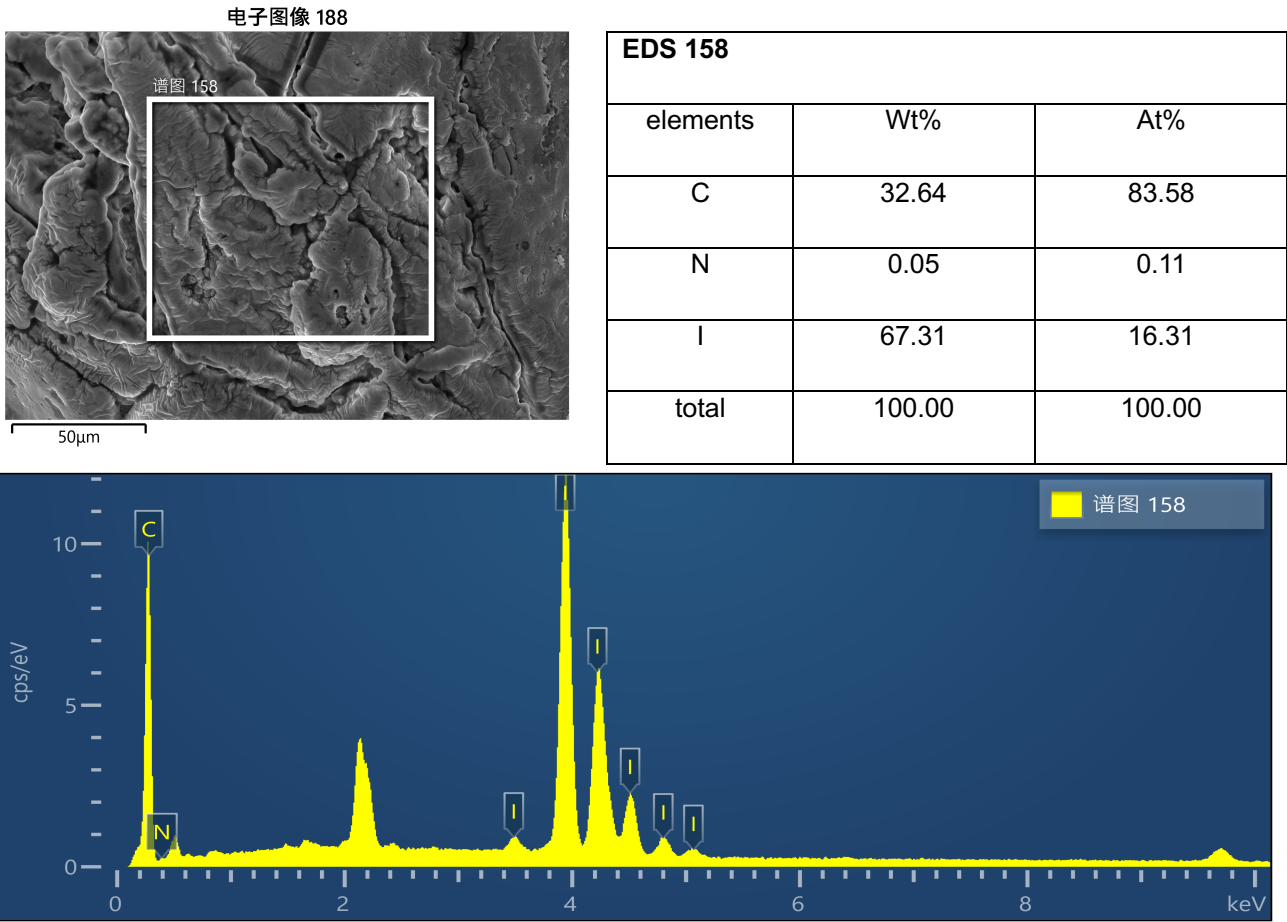

Fig. S40. Energy-dispersive spectroscopy (EDS) analysis profile of l<sub>2</sub>c **MeAn**[2 ].

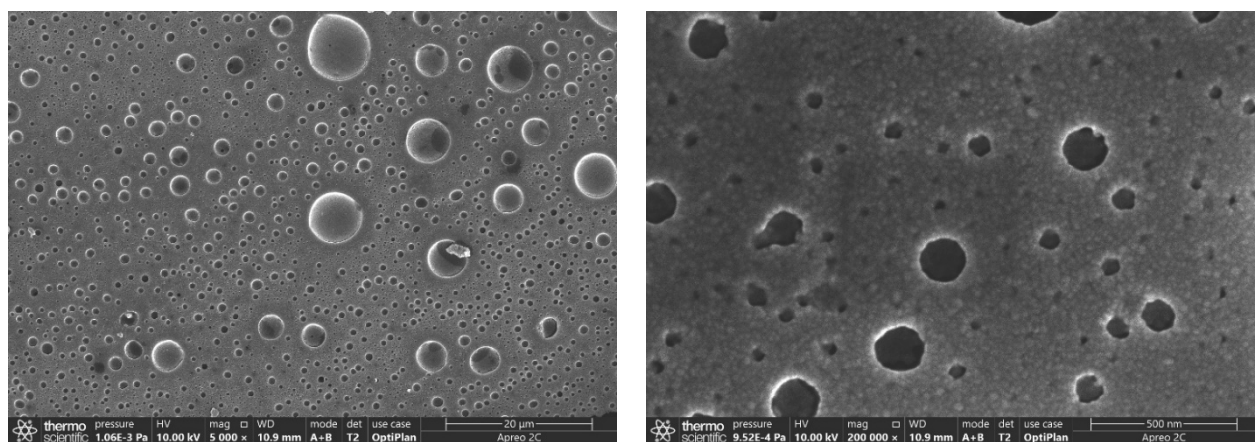

Fig. S41. Scanning electron microscopy images of I<sub>2</sub>C-EtAn[2].

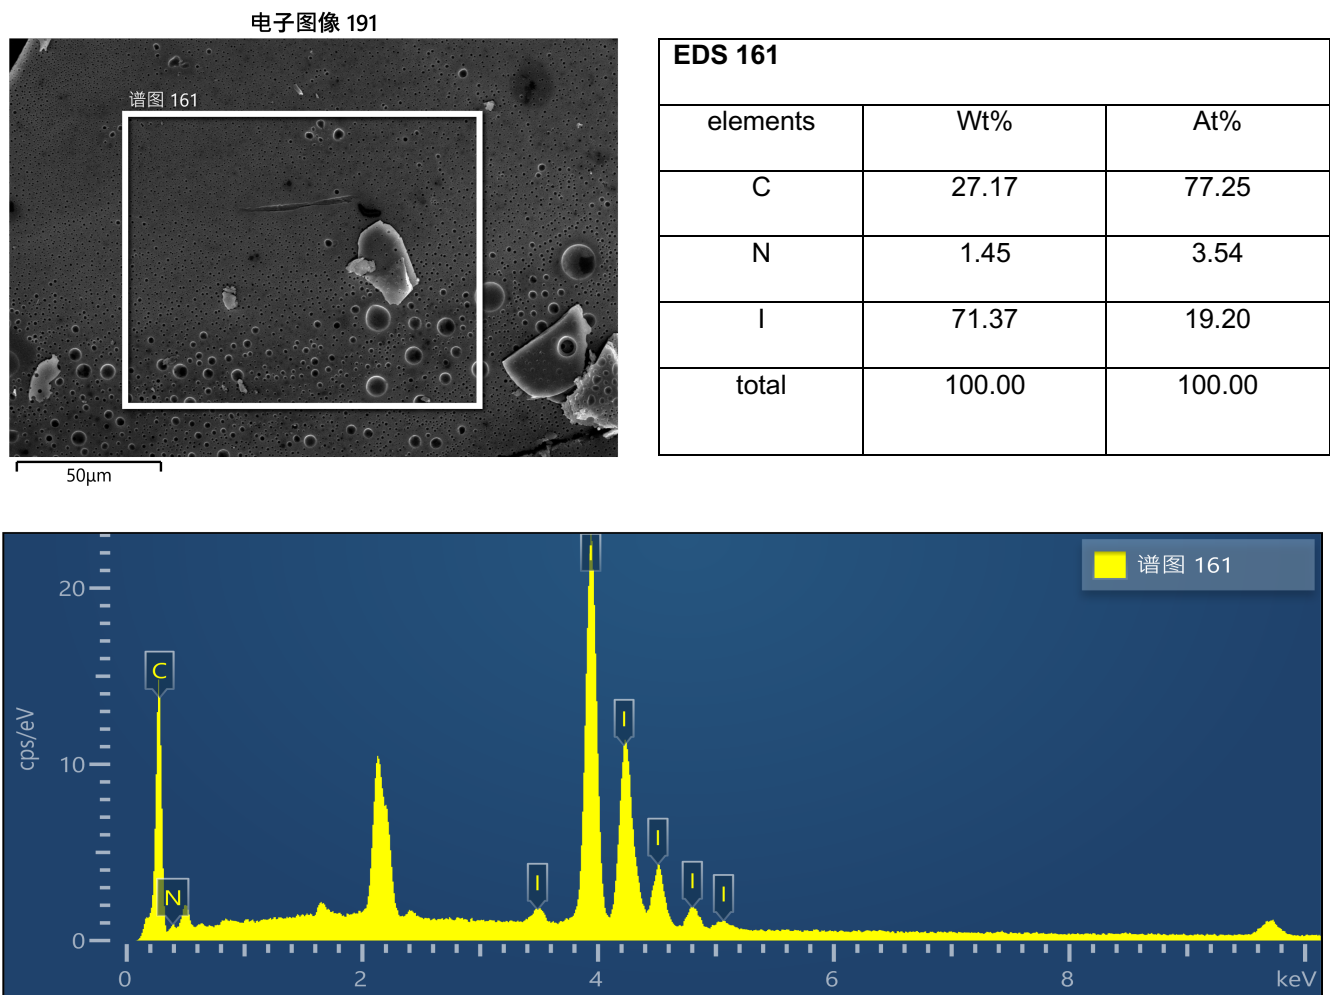

Fig. S42. Energy-dispersive spectroscopy (EDS) analysis profile of I<sub>2</sub>C-EtAn[2].

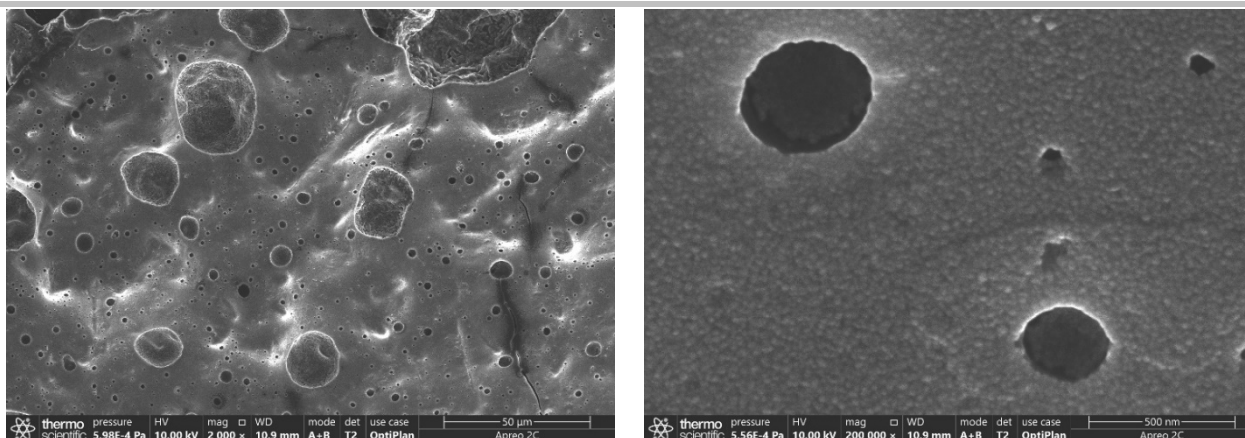

Fig. S43. Scanning electron microscopy images of  $I_2C$  PrAn[2].

电子图像 193

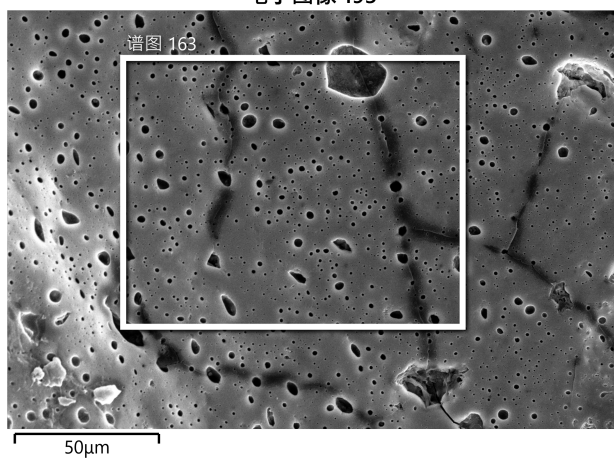

| EDS 163 |        |        |
|---------|--------|--------|
| element | Wt%    | At%    |
| C       | 26.15  | 76.93  |
| N       | 1.12   | 2.82   |
| I       | 72.73  | 20.25  |
| total   | 100.00 | 100.00 |

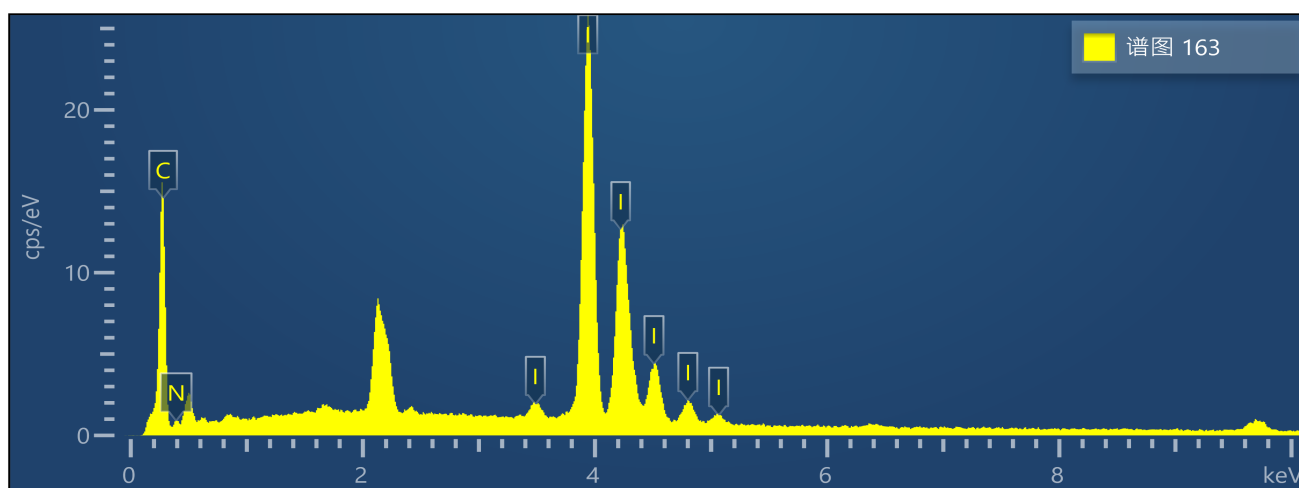

Fig. S44. Energy-dispersive spectroscopy (EDS) analysis profile of  $I_2C$  PrAn[2].

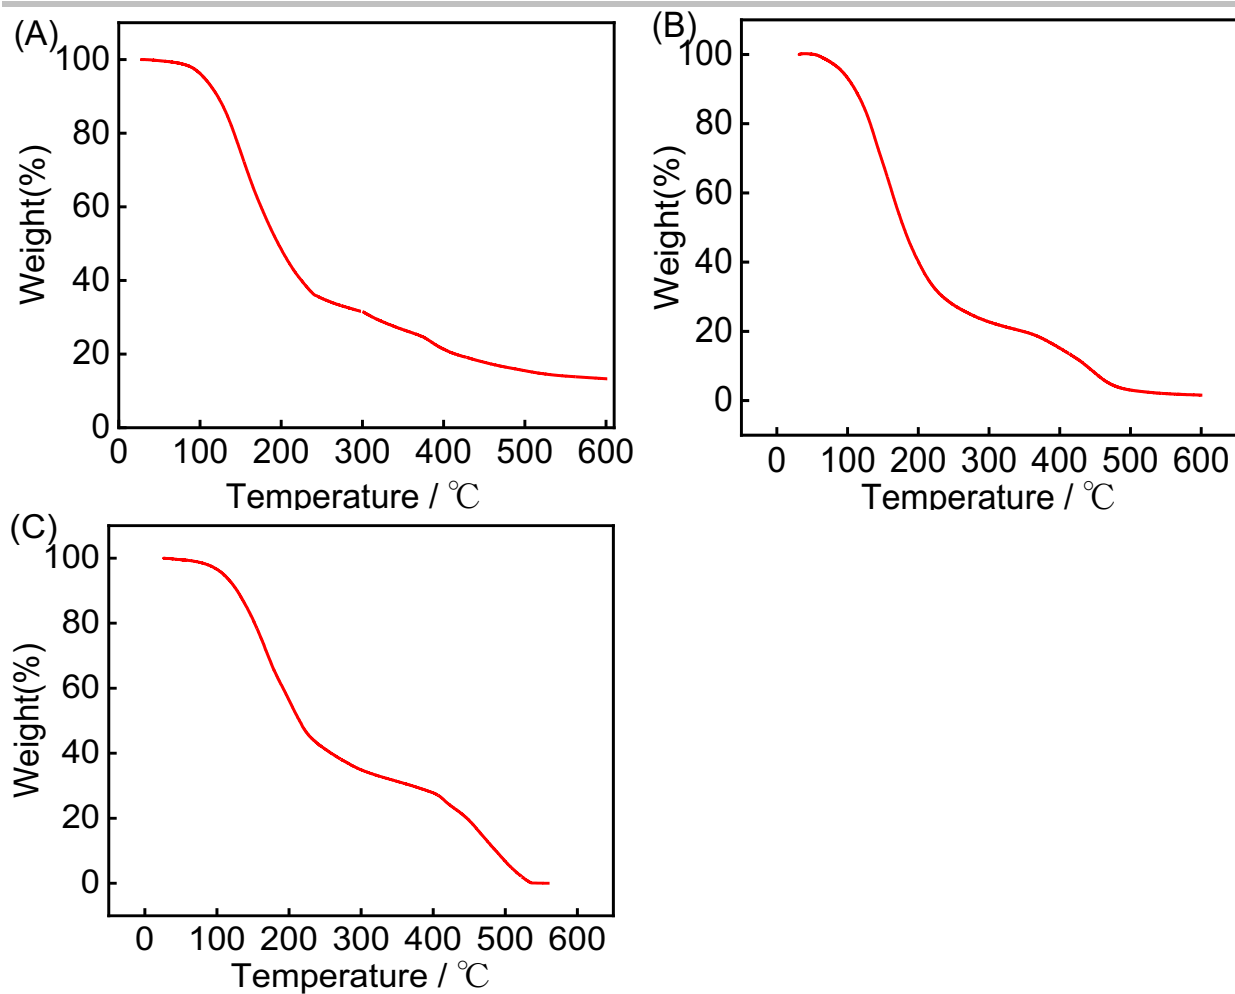

Fig. S45. TGA profiles of (A)  $I_2 \subset \text{MeAn}[2]$ , (B)  $I_2 \subset \text{EtAn}[2]$ , and (C)  $I_2 \subset \text{PrAn}[2]$ .



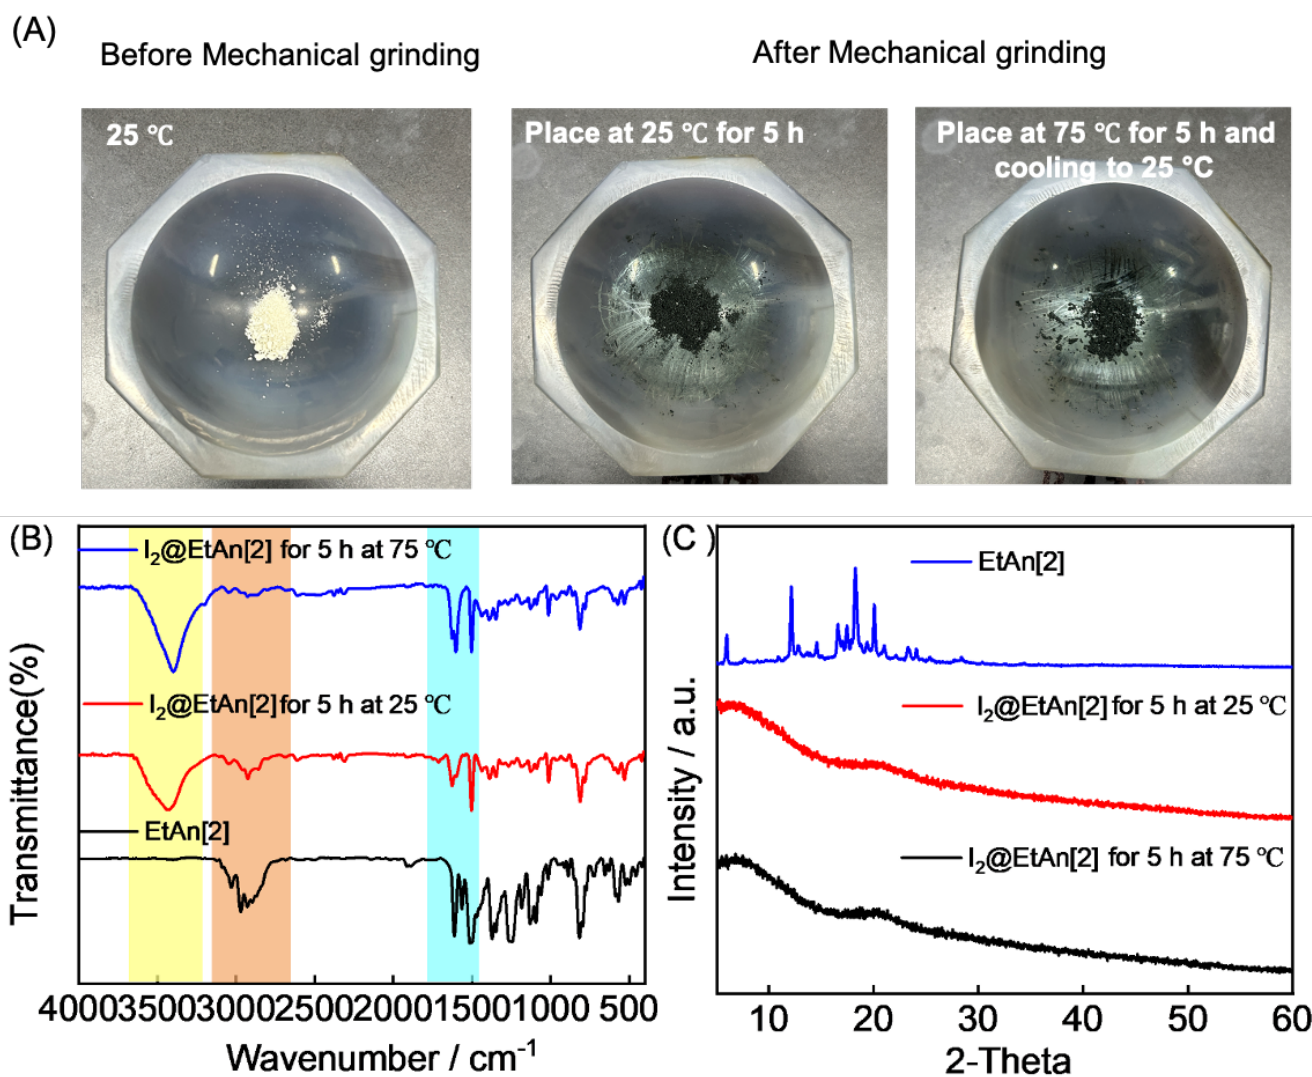

Fig. S46. (A) The photos of iodine and **EtAn[2]** before and after grinding in solid state. The left photo shows that the original state of **EtAn[2]** under 25 °C; The middle photo shows the state of **EtAn[2]** after grinding and placing for 5 hours at 25 °C. The right photo shows the state of **EtAn[2]** after grinding at 25 °C, placing at 75 °C for 5 hours and cooling to 25 °C. The mixture of iodine and EtAn[2] after mechanical grinding, the FT-IR(B) and XRD(C) spectrum after 5 hours of placement.

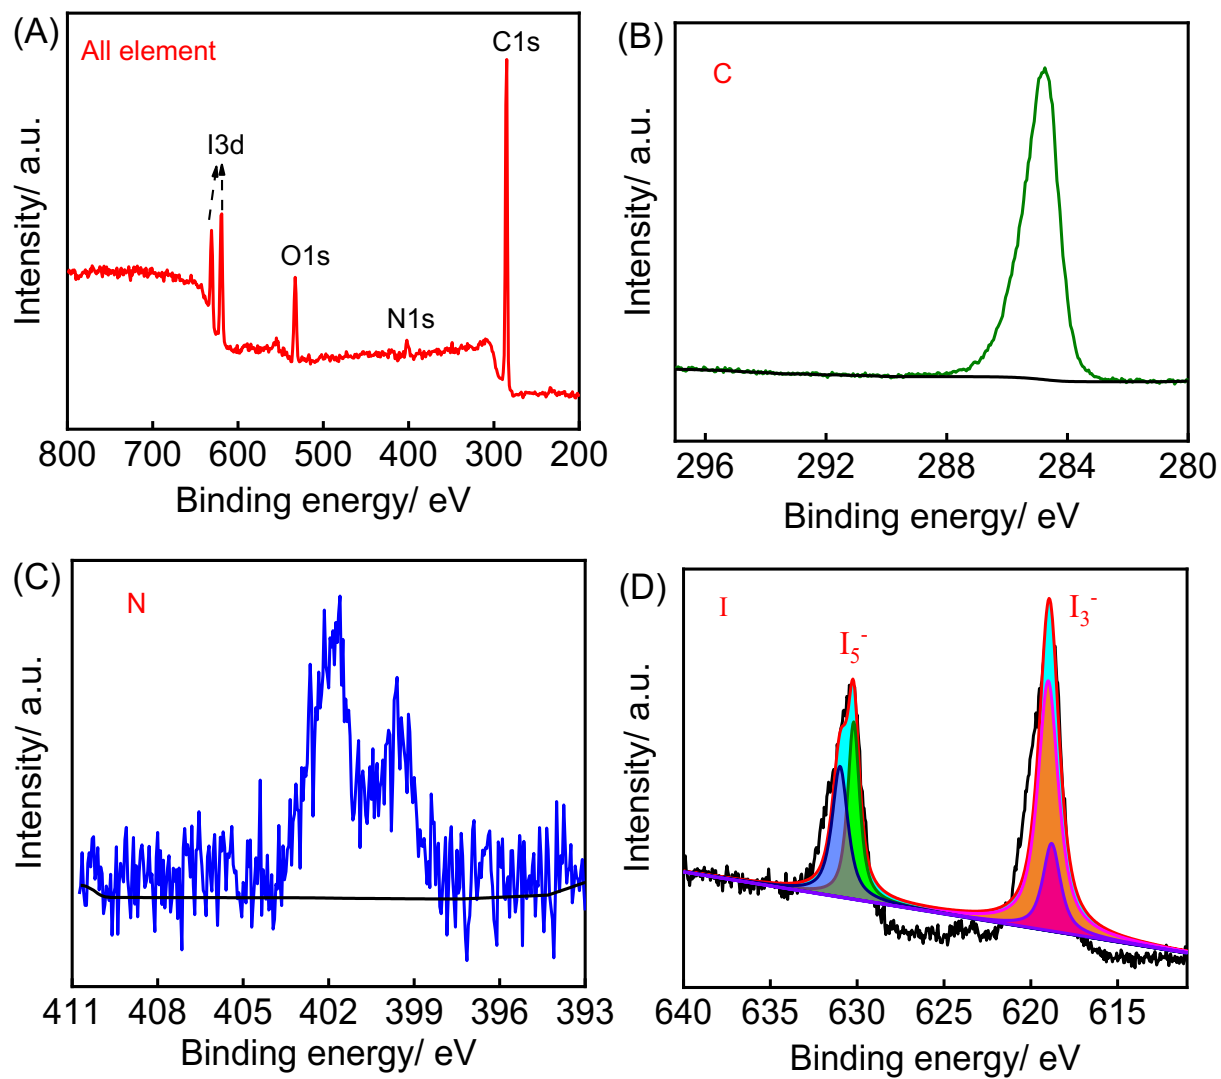

Fig. S47. XPS full spectra of (A)  $l_2c$  **MeAn[2]**, (B) C1s, (C) N1s and (D) I3d XPS spectra of  $l_2c$  **MeAn[2]**.

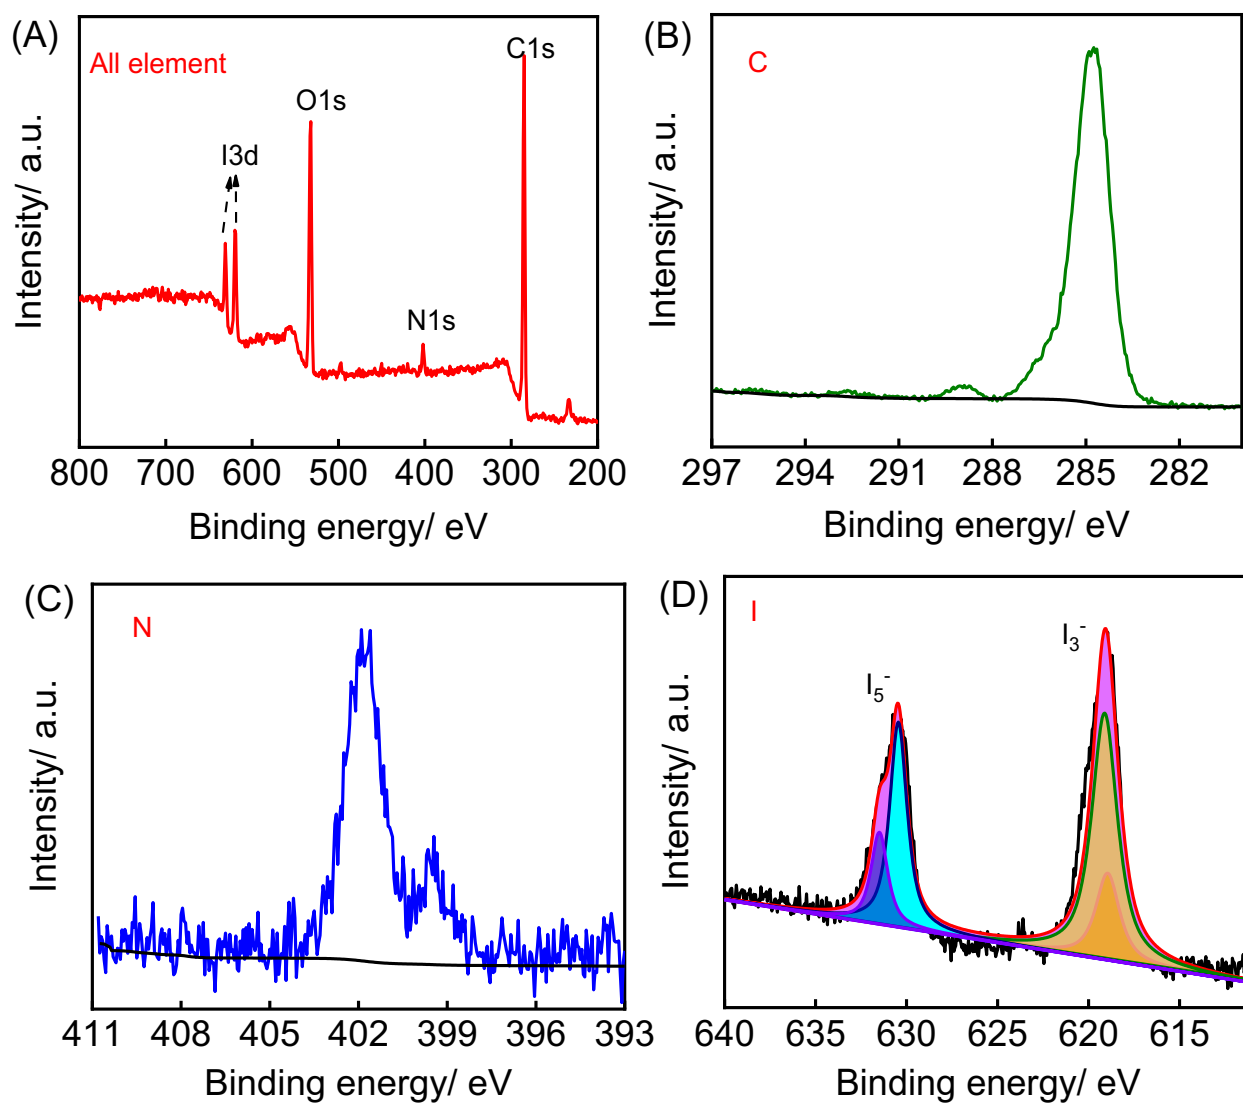

Fig. S48. XPS full spectra of (A)  $I_2$ -**EtAn**[2], (B) C1s, (C) N1s and (D) I3d XPS spectra of  $I_2$ -**EtAn**[2].

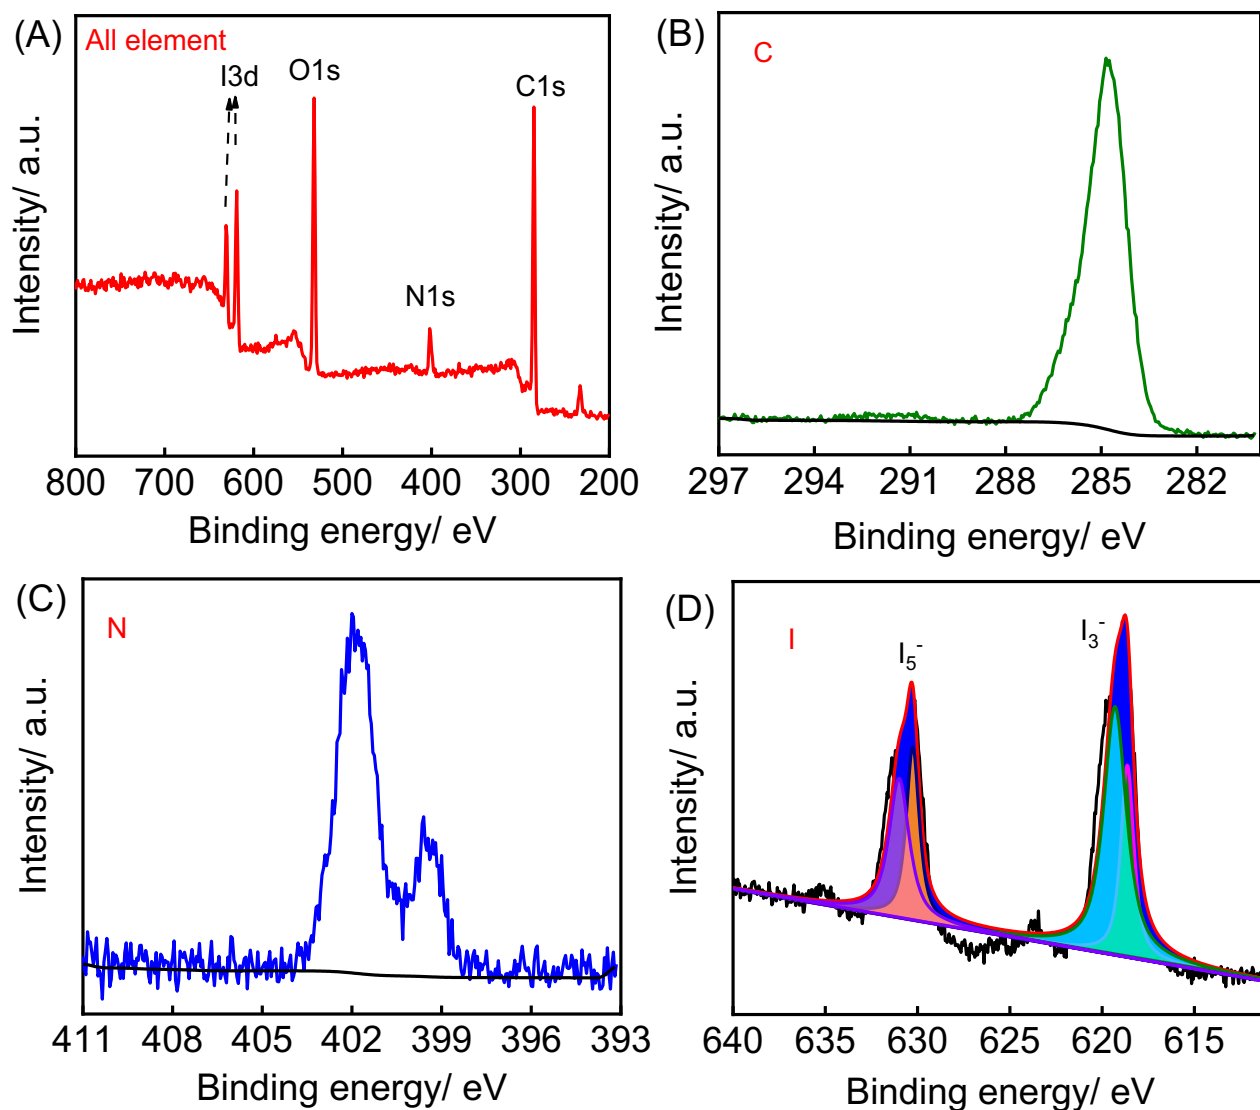

Fig. S49. XPS full spectra of (A)  $l_2C$  **PrAn[2]**, (B)  $C_{1s}$ , (C)  $N_{1s}$  and (D)  $I_{3d}$  XPS spectra of  $l_2C$  **PrAn[2]**.



## 6. Iodine uptake experiments in an aqueous solutions

### Standard calibration curve

I<sub>2</sub> solution absorbance-concentration standard calibration curve is obtained by measuring the absorbance value at a wavelength of 460nm at different concentrations.

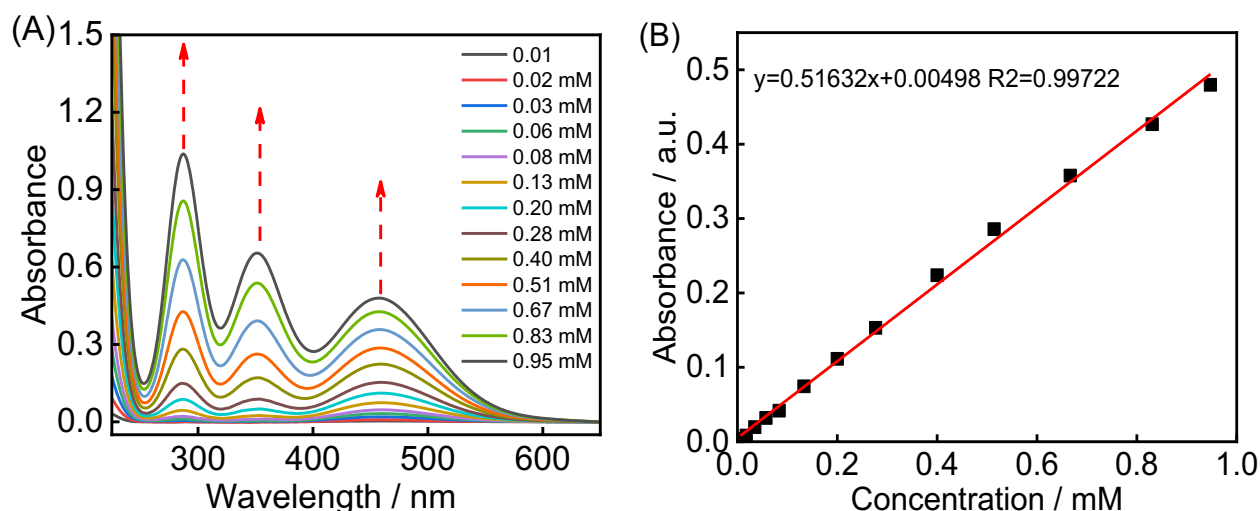

Fig. S50. (A) UV-Vis spectra of aqueous iodine solutions at different concentrations. (B) The standard curve plotted based on the absorbance at 460 nm (right).

### Iodine adsorption from the solutions [4]

An[2]s and P-Ns (5 mg) was added into an aqueous iodine solution (1.0 mM, 2.5 mL) and stirred at room temperature. Samples were taken at various time points and filtered. After constructing appropriate calibration curves, the concentration of iodine in the filtrate was determined by UV-Vis spectroscopy. The efficiency of iodine removal (%) by the adsorbents subject to study was determined using following equation:

$$\text{Iodine removal efficiency} = \frac{C_0 - C_t}{C_0} (2)$$

where  $C_0$  (mM) and  $C_t$  (mM) are the concentrations of iodine before and after adsorption, respectively.

The amount of adsorbed iodine was determined using the following equation:

$$qt = \frac{(C_0 - C_t) \times Mw \times V}{1000m} \times 100\% (3)$$

where  $qt$  ( $\text{g g}^{-1}$ ) is amount of iodine adsorbed per g of adsorbent at time  $t$  (min).  $C_0$  (mM) and  $C_t$  (mM) are the initial and residual concentrations of iodine in the stock solution and filtrate, respectively;  $V$  (mL) is the volume of iodine solution used for adsorption;  $m$  (g) is the mass of adsorbent used in the study.  $Mw$  ( $\text{g mol}^{-1}$ ) is the molar mass of iodine.

### Adsorption kinetics

The adsorption kinetics were quantified using Pseudo-second-order model from which the apparent rate constant  $k_{obs}$  can be obtained:

$$\frac{t}{q_t} = \frac{1}{k_2 q_e^2} + \frac{t}{q_e} \quad (4)$$

where  $q_t$  and  $q_e$  are the adsorbate uptakes (g adsorbate per g An[2]s) at time  $t$  (min) and at equilibrium, respectively, and  $k_{obs}$  is an apparent second-order rate constant ( $\text{g g}^{-1} \text{min}^{-1}$ ). The rate constant  $k_{obs}$  can be calculated from the intercept and slope of the plot of  $t/q_t$  against  $t$ .

**Table S6.** Kinetic data corresponding to iodine adsorption by the An[2]s ( $2 \text{ mg mL}^{-1}$ ) of this study from the aqueous iodine source phase ( $1.0 \text{ mM}$ ).

| Entry              | Slope  | Intercept | $q_e$  | $k_{obs}$<br>$\text{g g}^{-1} \text{min}^{-1}$ | $R^2$  |
|--------------------|--------|-----------|--------|------------------------------------------------|--------|
| MeAn[2]            | 6.8981 | 4.6722    | 0.1450 | 10.1844                                        | 0.9980 |
| EtAn[2]            | 6.4385 | 0.9436    | 0.1553 | 43.9320                                        | 0.9995 |
| PrAn[2]            | 6.5677 | 1.3789    | 0.1530 | 31.2820                                        | 0.9999 |
| P-A                | 6.4767 | 0.3671    | 0.1533 | 114.2676                                       | 0.9999 |
| P-B                | 6.5224 | 0.1814    | 0.1529 | 234.5187                                       | 0.9999 |
| P-C                | 6.5304 | 0.2794    | 0.1530 | 152.6346                                       | 0.9999 |
| Acs <sup>[5]</sup> | 6.5774 | 290.6384  | 0.152  | 0.1490                                         | 0.9960 |

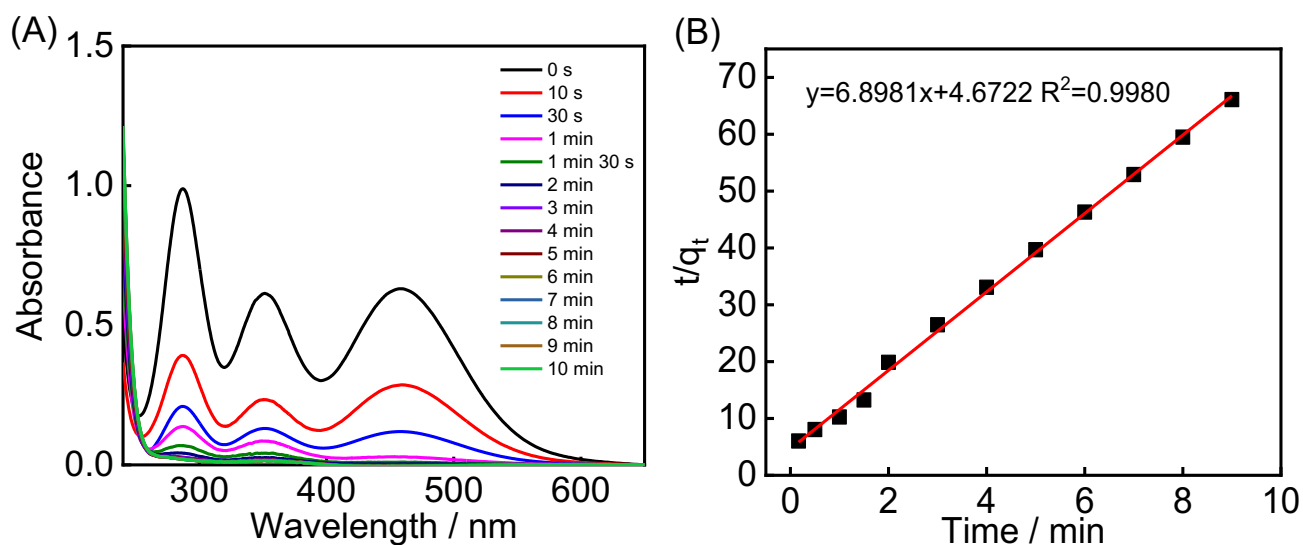

Fig. S51. (A) Time-dependent UV/vis absorption spectra of aqueous  $I_2$  solution (1.0 mM) upon stirring in the presence of **MeAn[2]** (5.0 mg). (B) Line fitting with Pseudo-second-order models for adsorption kinetics data.

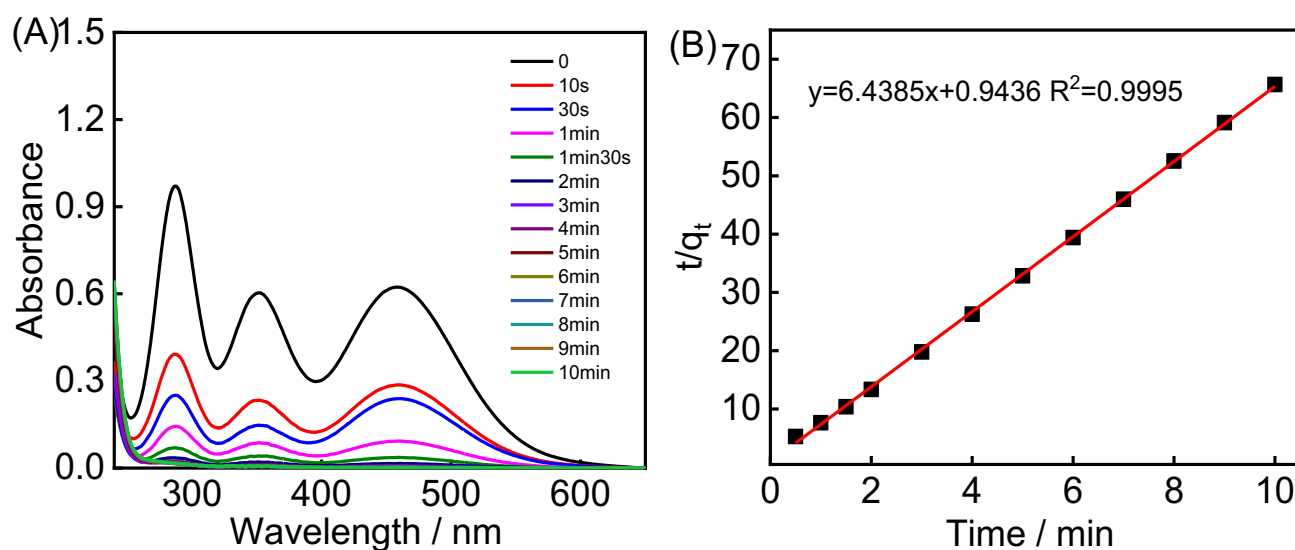

Fig. S52. (A) Time-dependent UV/vis absorption spectra of aqueous  $I_2$  solution (1.0 mM) upon stirring in the presence of **EtAn[2]** (5.0 mg). (B) Linear fitting following the Pseudo-second-order model based on the adsorption kinetics data.

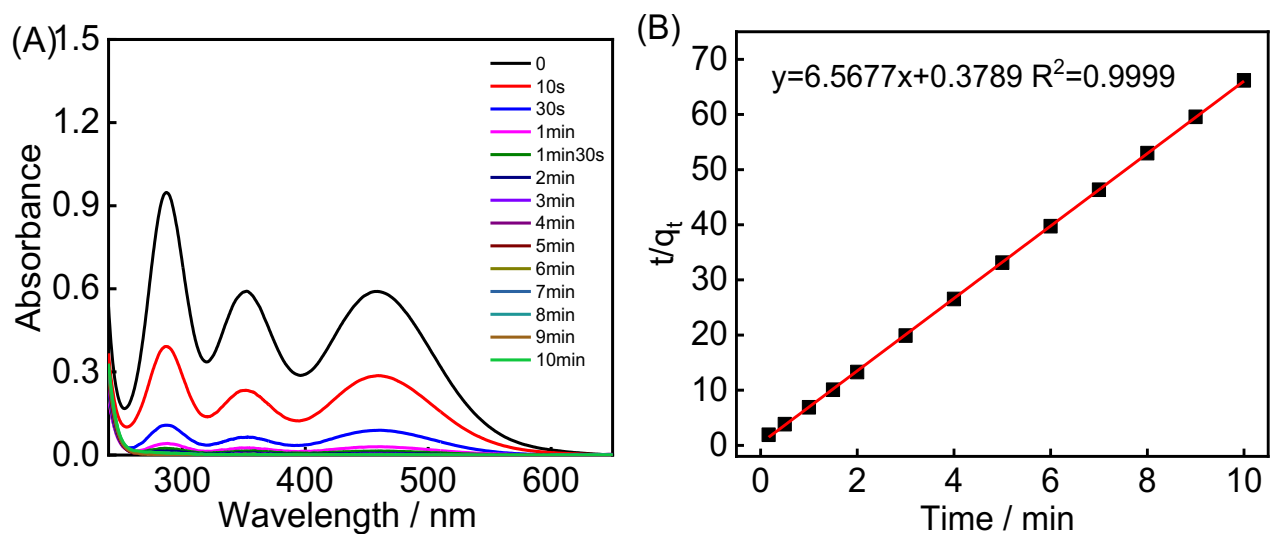

Fig. S53. (A) Time-dependent UV/vis absorption spectra of aqueous  $I_2$  solution (1.0 mM) upon stirring in the presence of **PrAn[2]** (5.0 mg). (B) Linear fitting following the Pseudo-second-order model based on the adsorption kinetics data.

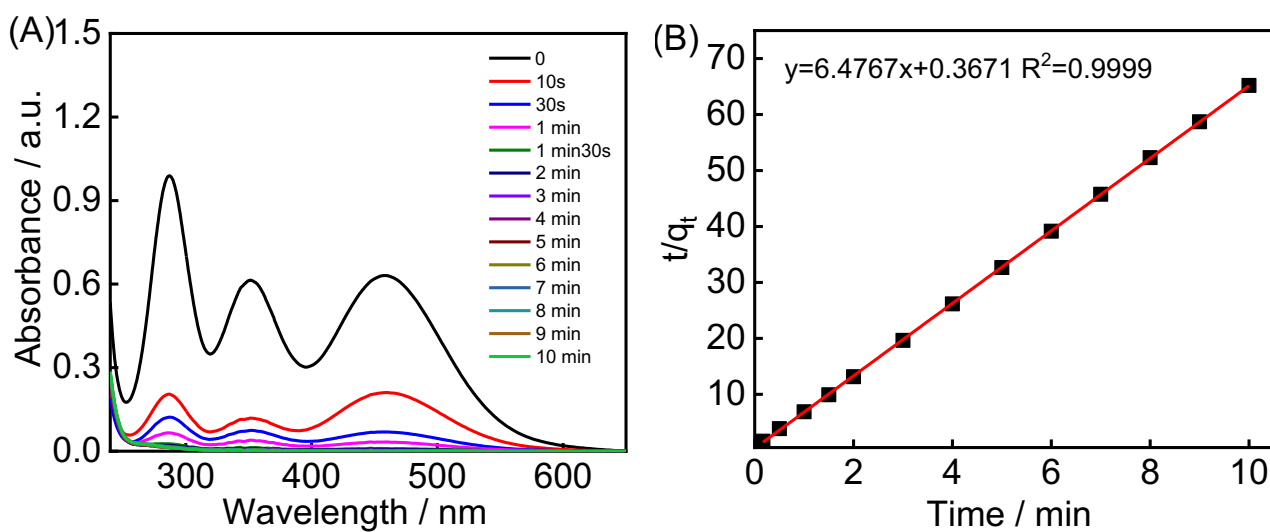

Fig. S54. (A) Time-dependent UV/vis absorption spectra of aqueous  $I_2$  solution (1.0 mM) upon stirring in the presence of **P-A** (5.0 mg). (B) Line fitting with Pseudo-second-order models for adsorption kinetics data.

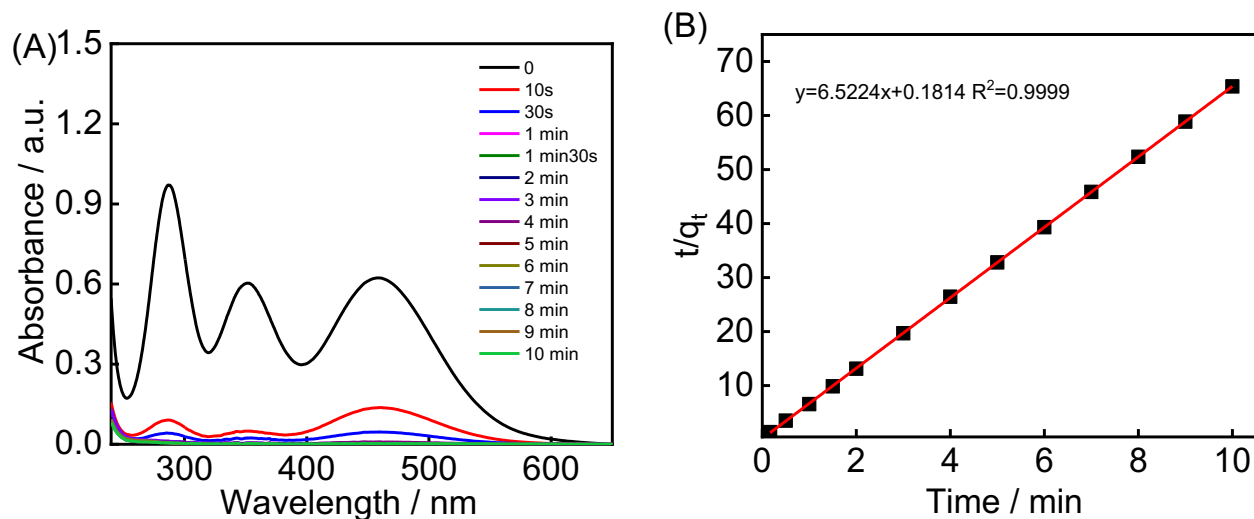

Fig. S55. (A) Time-dependent UV/vis absorption spectra of aqueous  $I_2$  solution (1.0 mM) upon stirring in the presence of **P-B** (5.0 mg). (B) Line fitting with Pseudo-second-order models for adsorption kinetics data.

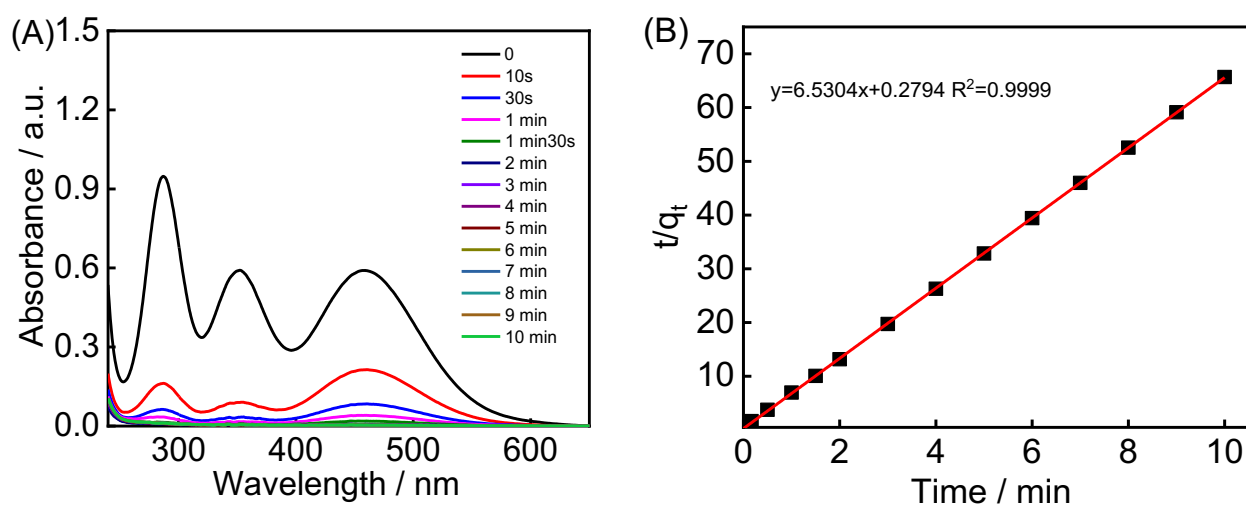

Fig. S56. (A) Time-dependent UV/vis absorption spectra of aqueous  $I_2$  solution (1.0 mM) upon stirring in the presence of **P-C** (5.0 mg). (B) Line fitting with Pseudo-second-order models for adsorption kinetics data.

Table S7. The ratio of I<sub>2</sub> to **An[2]**s

|                | Mw g/mol       | q <sub>m</sub> g/g | Calculation formula                                  |
|----------------|----------------|--------------------|------------------------------------------------------|
| A <sup>a</sup> | M <sup>b</sup> | q <sup>c</sup>     | $\frac{q}{Mw_I} \div \frac{1}{M}$                    |
| MeAn[2]        | 600.3291       | 5.28               | $\frac{5.28}{253.8} \div \frac{1}{600.3291} = 12.49$ |
| EtAn[2]        | 656.3905       | 7.35               | $\frac{7.35}{253.8} \div \frac{1}{656.3905} = 19.01$ |
| PrAn[2]        | 712.3437       | 7.01               | $\frac{7.01}{253.8} \div \frac{1}{712.3437} = 19.68$ |

<sup>a</sup>name; <sup>b</sup>relative molecular mass; <sup>c</sup>adsorption capacity.

Table S8. The charge balance of I<sub>2</sub> to **An[2]**s based on the peak area of the XPS spectrum

|         | A <sub>630 eV</sub> ( I <sub>5</sub> <sup>-</sup> ) <sup>a</sup> | A <sub>619 eV</sub> ( I <sub>3</sub> <sup>-</sup> ) <sup>b</sup> | $\frac{A_{630\text{ eV}}}{A_{619\text{ eV}}}$ | Contents of iodine species                                      | N <sub>I</sub> |
|---------|------------------------------------------------------------------|------------------------------------------------------------------|-----------------------------------------------|-----------------------------------------------------------------|----------------|
| MeAn[2] | 8675.483                                                         | 13100.400                                                        | 2:3                                           | 3 I <sub>5</sub> <sup>-</sup> & 4.5 I <sub>3</sub> <sup>-</sup> | 28.5           |
| EtAn[2] | 7506.148                                                         | 12226.700                                                        | 2:3                                           | 4 I <sub>5</sub> <sup>-</sup> & 6 I <sub>3</sub> <sup>-</sup>   | 38             |
| PrAn[2] | 10017.52                                                         | 16022.54                                                         | 2:3                                           | 4 I <sub>5</sub> <sup>-</sup> & 6 I <sub>3</sub> <sup>-</sup>   | 38             |

<sup>a</sup>The peak area of binding energy at 630 eV; <sup>b</sup>The peak area of binding energy at 619 eV.

Table S9. Comparison of iodine adsorption capacities in the aqueous solution of various adsorbents.

| Materials | Iodine uptake Capacity (g g <sup>-1</sup> ) | Type                    | Reference                                     |
|-----------|---------------------------------------------|-------------------------|-----------------------------------------------|
| MeAn[2]   | 5.48                                        | Anilino macrocycle      | This work                                     |
| EtAn[2]   | 4.40                                        | Anilino macrocycle      | This work                                     |
| PrAn[2]   | 3.80                                        | Anilino macrocycle      | This work                                     |
| P-A       | 3.34                                        | Aniline-based polymer   | This work                                     |
| C[4]P-BTP | 3.24                                        | Calix[4]pyrrole         | Angew. Chem. 2021, 133, 2–10                  |
| P-B       | 3.10                                        | Aniline-based polymer   | This work                                     |
| CaCOP3    | 3.1                                         | Calix[4]arenes          | Mater. Chem. Phys., 2020, 239, 122328         |
| C[4]P-TPE | 2.99                                        | Calix[4]pyrrole         | Angew. Chem. 2021, 133, 2–10                  |
| CaCOP2    | 2.81                                        | Calix[4]arenes          | Mater. Chem. Phys., 2020, 239, 122328         |
| P-C       | 2.56                                        | Aniline-based polymer   | This work                                     |
| CaCOP1    | 2.4                                         | Calix[4]arenes          | Mater. Chem. Phys., 2020, 239, 122328         |
| CalCOP1   | 2.32                                        | Polycalix[4]arenes      | J Mater Sci., 2020, 55, 1854                  |
| HCOF-1    | 2.1±0.1                                     | HOF                     | J. Am. Chem. Soc. 2017, 139, 7172             |
| CalCOP2   | 1.758                                       | Polycalix[4]arenes      | J Mater Sci., 2020, 55, 1854                  |
| 3D MOF-1  | 1.1±0.05                                    | MOF                     | ACS Appl. Mater. Interfaces., 2020, 12, 46107 |
| TAPB-BPDA | 0.988                                       | Nitrogen-containing COF | React Funct Polym., 2021, 159, 104806         |
| THPS-C    | 0.926                                       | Triptycene              | Adv. Mater. Interfaces., 2019, 6, 1900249     |
| CalCOP3   | 0.346                                       | Polycalix[4]arenes      | J Mater Sci., 2020, 55, 1854                  |
| CalCOP4   | 0.156                                       | Polycalix[4]arenes      | J Mater Sci., 2020, 55, 1854                  |
| G-QP6     | 0.247                                       | Quaterphen[n]arenes     | Angew. Chem. Int. Ed. 2019, 58, 3885          |
| G-QP5     | 0.245                                       | Quaterphen[n]arenes     | Angew. Chem. Int. Ed. 2019, 58, 3885          |
| G-TP5     | 0.243                                       | Terphen[n]arenes        | Angew. Chem. Int. Ed. 2019, 58, 3885          |
| G-TP6     | 0.24                                        | Terphen[n]arenes        | Angew. Chem. Int. Ed. 2019, 58, 3885          |
| DTTP5     | 0.0943                                      | Pillar[5]arene-based    | Polym. Chem., 2021, 12, 3517                  |

## 7. Fixed bed adsorption experiment

A column with a cross-sectional area of 20 mm<sup>2</sup> was filled with **An[2]**s (50 mg). A saturated aqueous iodine solution (1.2 mM, 10 mL) was then passed through this column at a flow rate of 0.6 mL min<sup>-1</sup> as controlled by a syringe pump. The eluent was analyzed directly by means of UV/Vis spectroscopy.

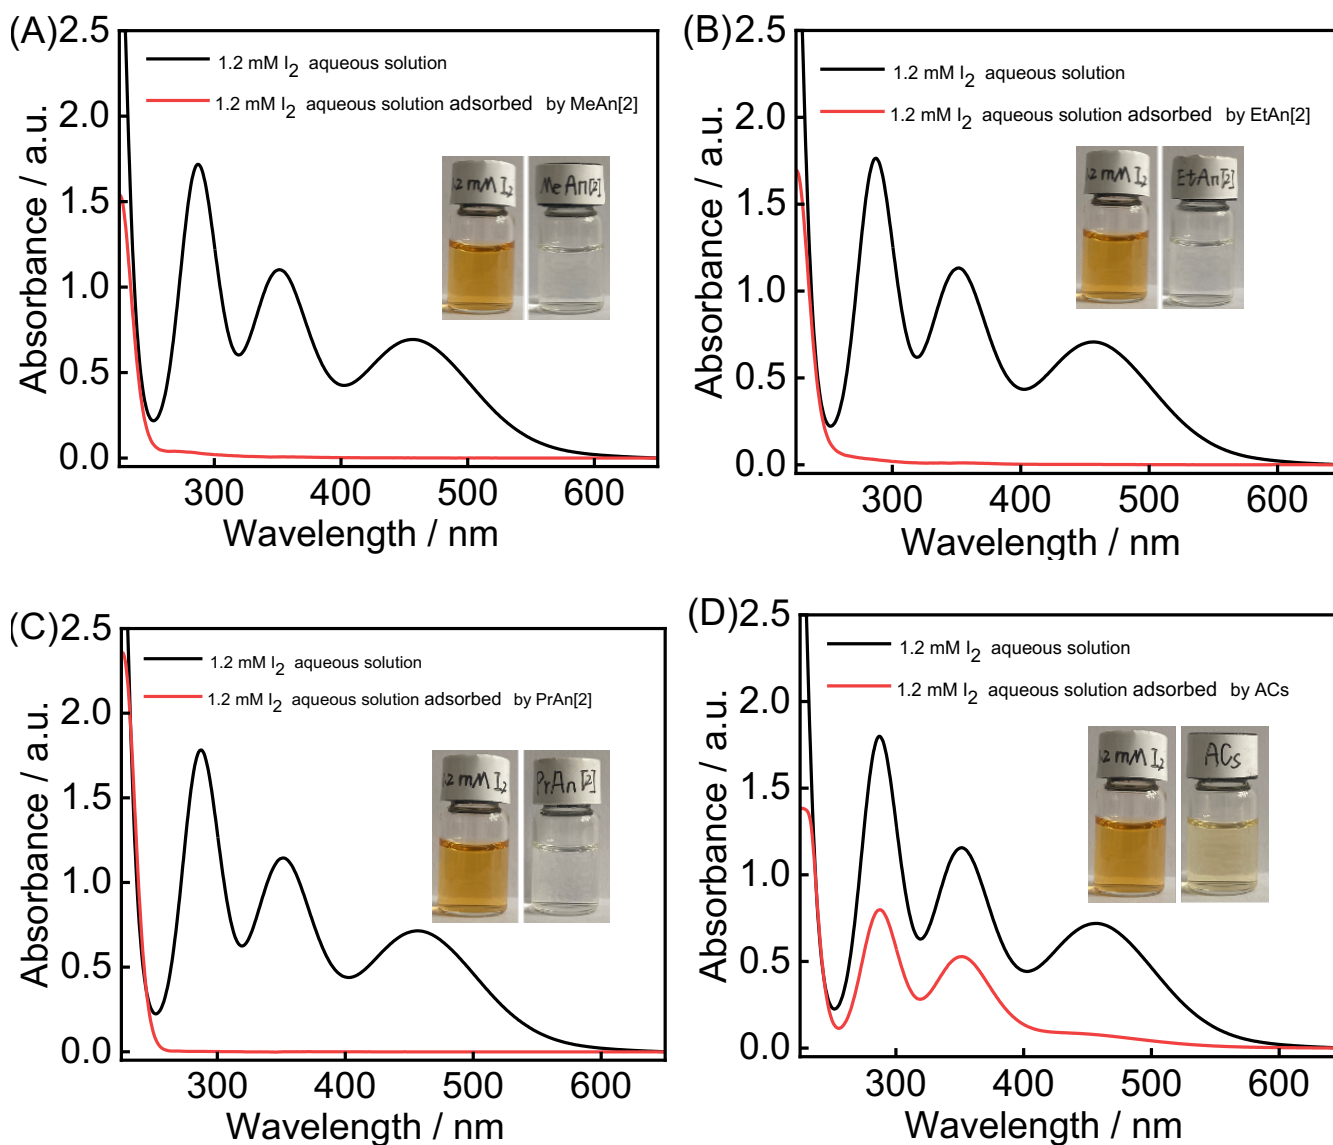

Fig. S57. UV/Vis spectra of saturated iodine aqueous solutions before and after flow-through adsorption by (A-C) **An[2]**s and (D) activated carbons (ACs), respectively. The inset shows the color changes of the iodine aqueous solution after flow-through adsorption by **An[2]**s and ACs, respectively.



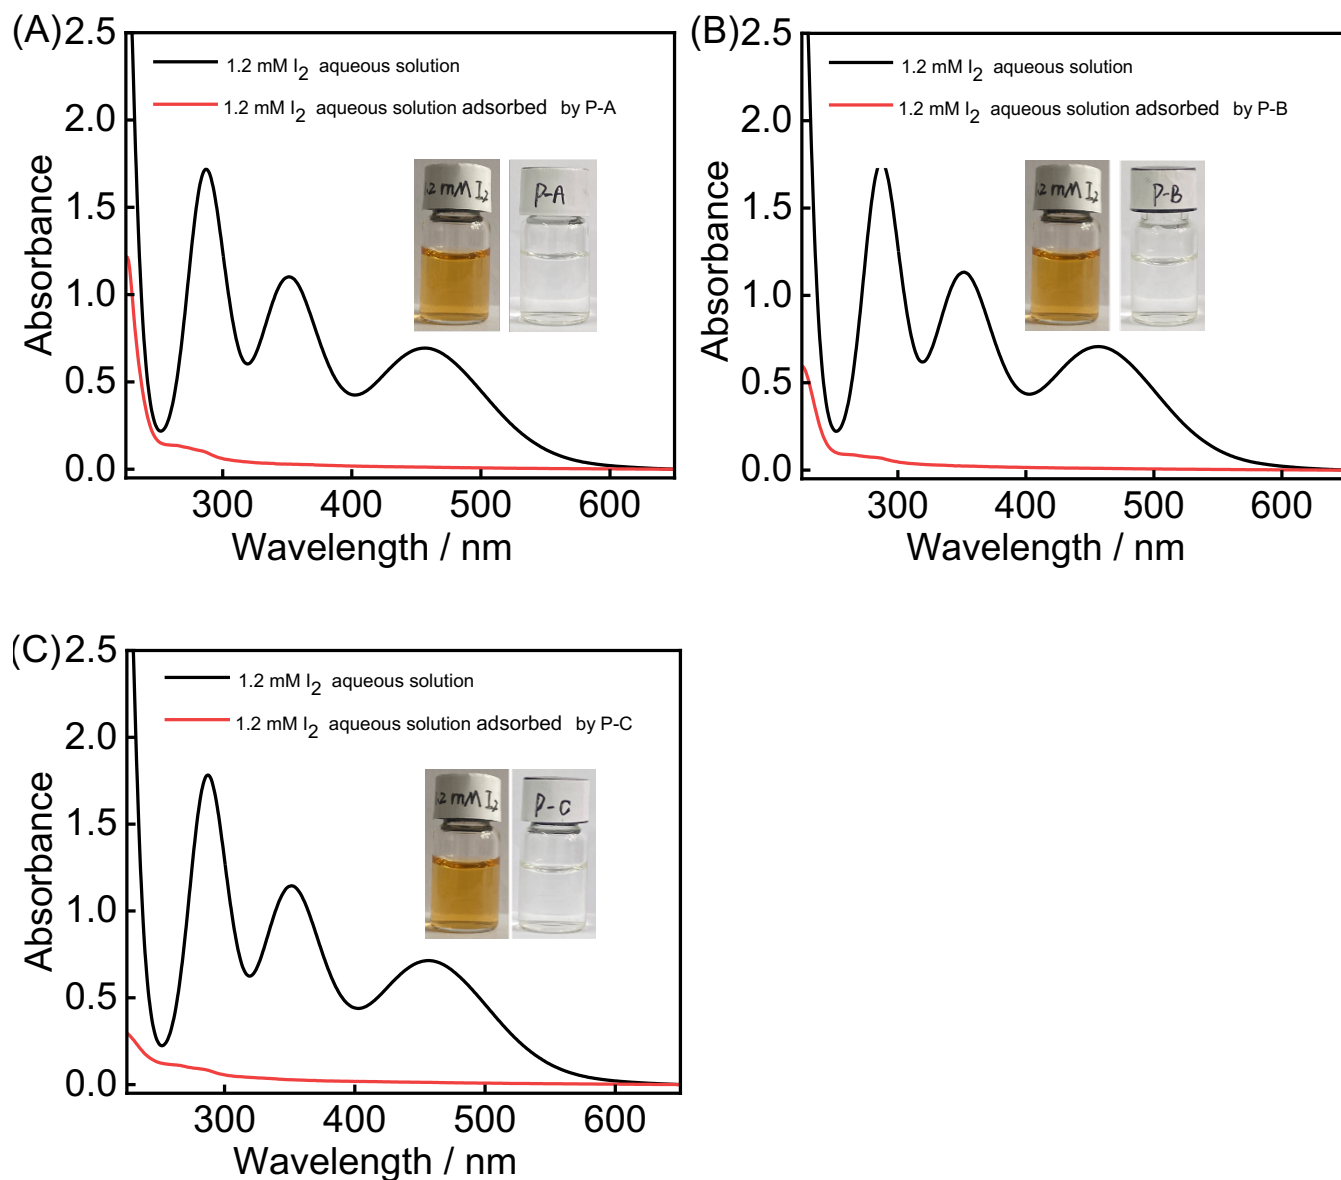

Fig. S58. UV/Vis spectra of saturated iodine aqueous solutions before and after flow-through adsorption by **An[2]**'s polymers. The inset shows the color changes of the iodine aqueous solution after flow-through adsorption by the polymers, respectively.

## 8. Iodine release

### Iodine release from iodine-loaded An[2]s

In order to monitor the iodine-releasing speed from iodine-loaded macrocyclic arenes, time-dependent UV/vis spectral measurements were carried out in cyclohexane. In a typical experiment, an iodine-loaded macrocycle was immersed in cyclohexane. in a vial with stirring. The UV-Vis adsorptions were recorded by periodically withdrawing a 10 mL cyclohexane solution from the mother solution and transferring it back after the spectral measurement.

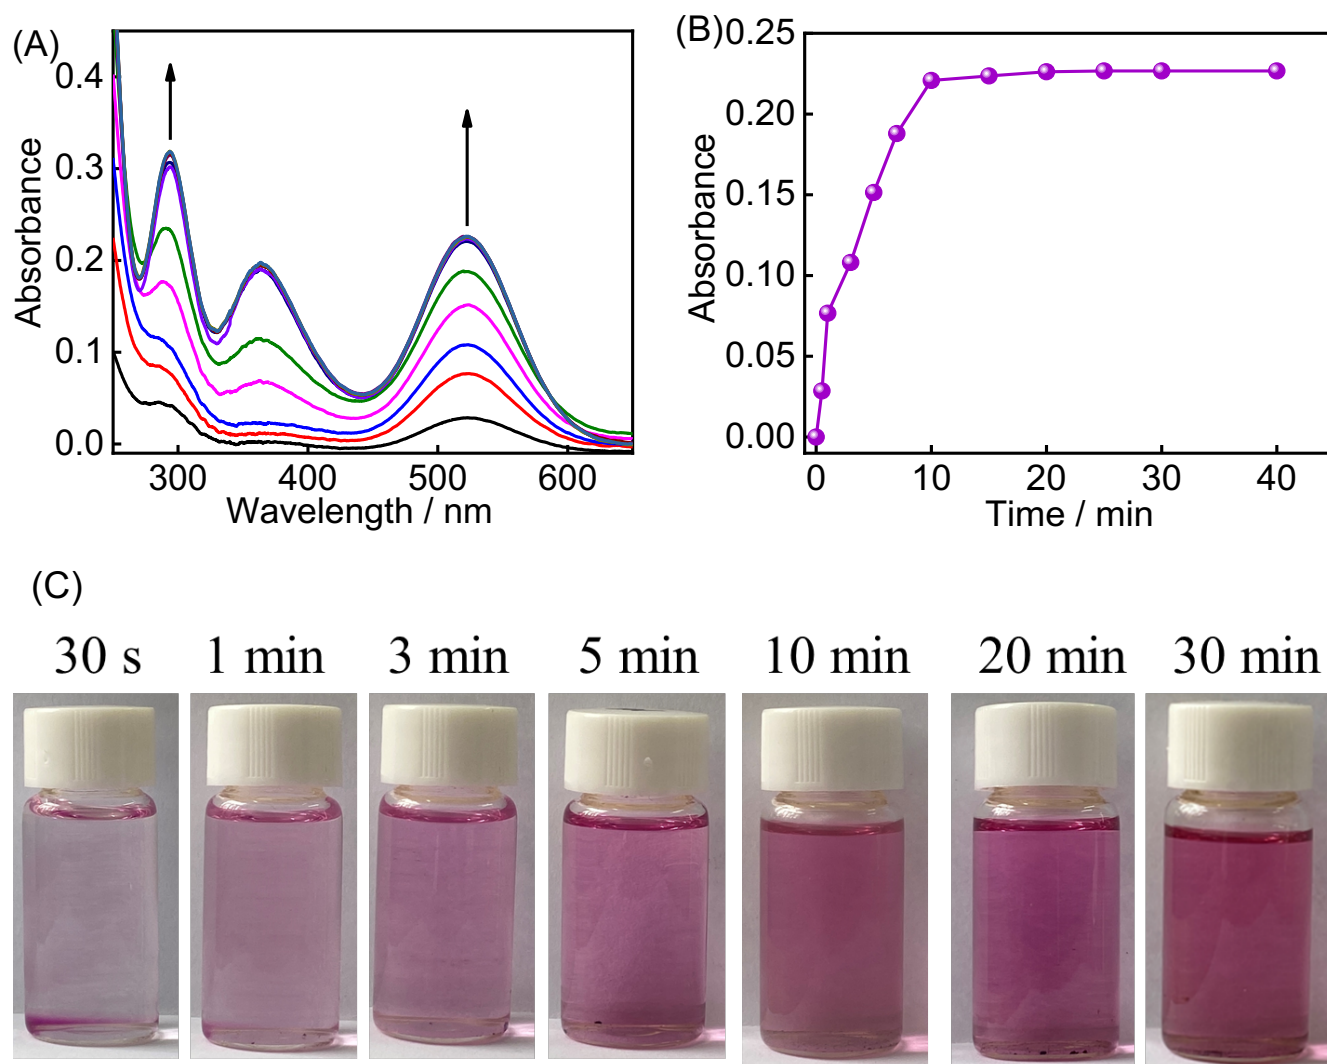

Fig. S59. (A) Time-dependent UV/vis spectral changes after adding 0.5 mg I<sub>2</sub>⊂ **MeAn[2]** in 10.0 mL cyclohexane.

B) I<sub>2</sub> absorbance at 522 nm at various times in (A). (C) Photographs of iodine release of 0.5 mg I<sub>2</sub>⊂ **MeAn[2]** in 10.0 mL cyclohexane.

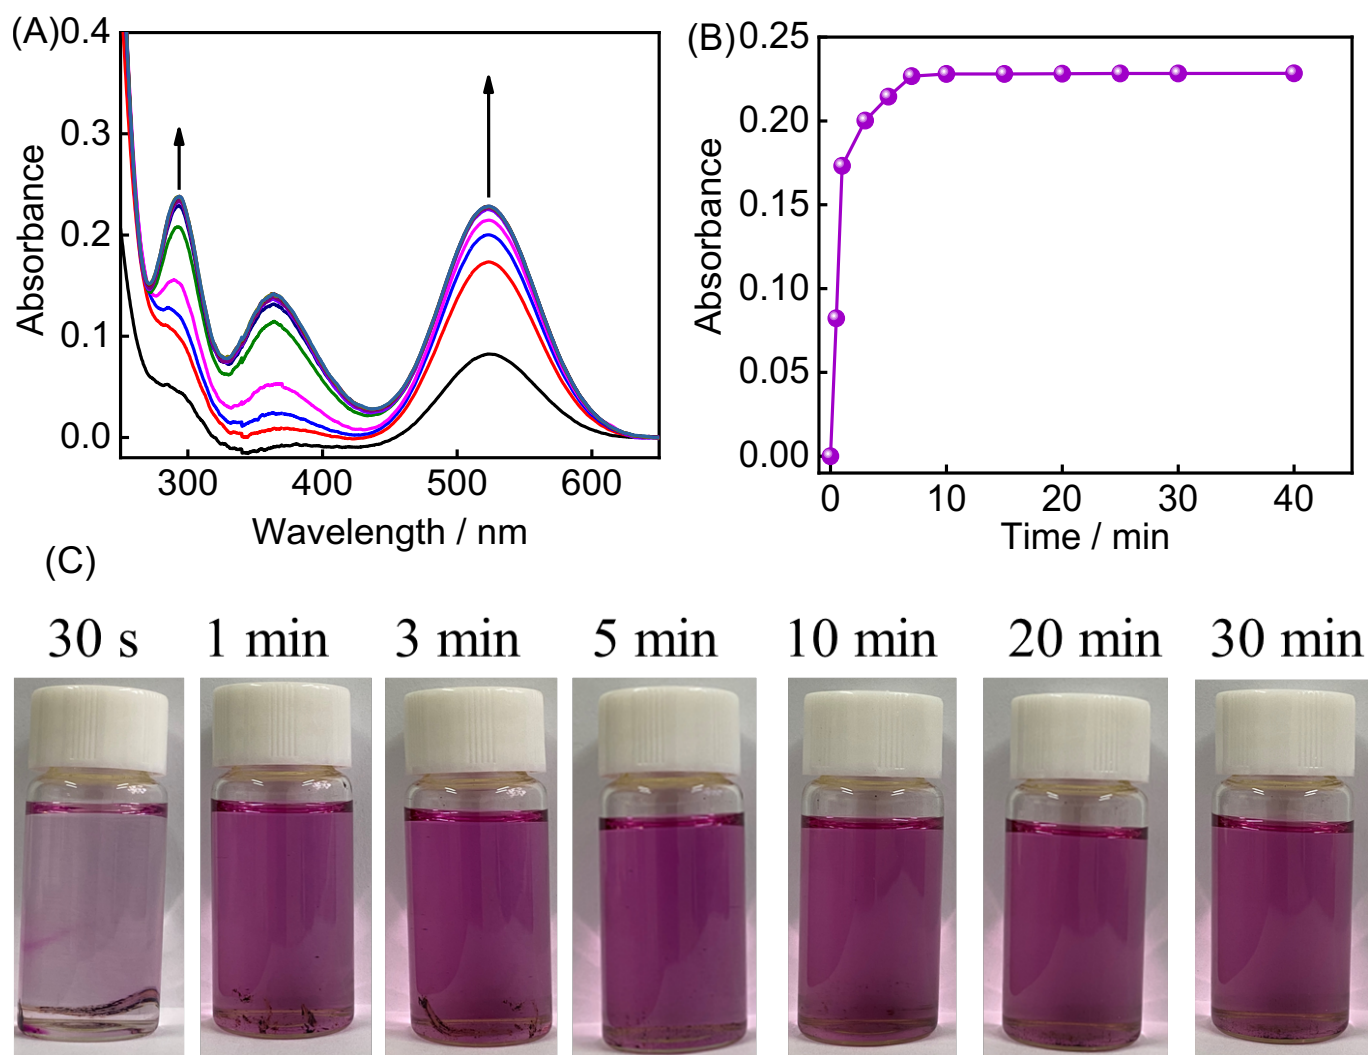

Fig. S60. (A) Time-dependent UV/vis spectral changes after adding 0.5 mg  $I_2$   $\subset$  **PrAn[2]** in 10.0 mL cyclohexane. (B)  $I_2$  absorbance at 522 nm at various times in (A). (C) Photographs of iodine release of 0.5 mg  $I_2$   $\subset$  **PrAn[2]** in 10.0 mL cyclohexane.

Field emission scanning electron microscope(FESEM) of  $I_2 \subset \text{MeAn}[2]$  after the release of iodine

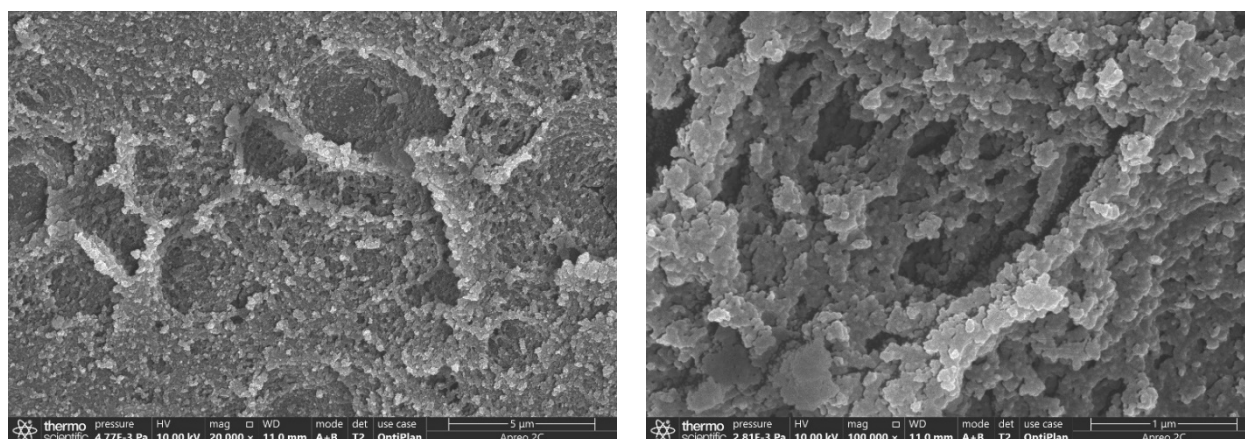

Fig. S61. Scanning electron microscopy images of  $I_2 \subset \text{MeAn}[2]$  after the release of iodine

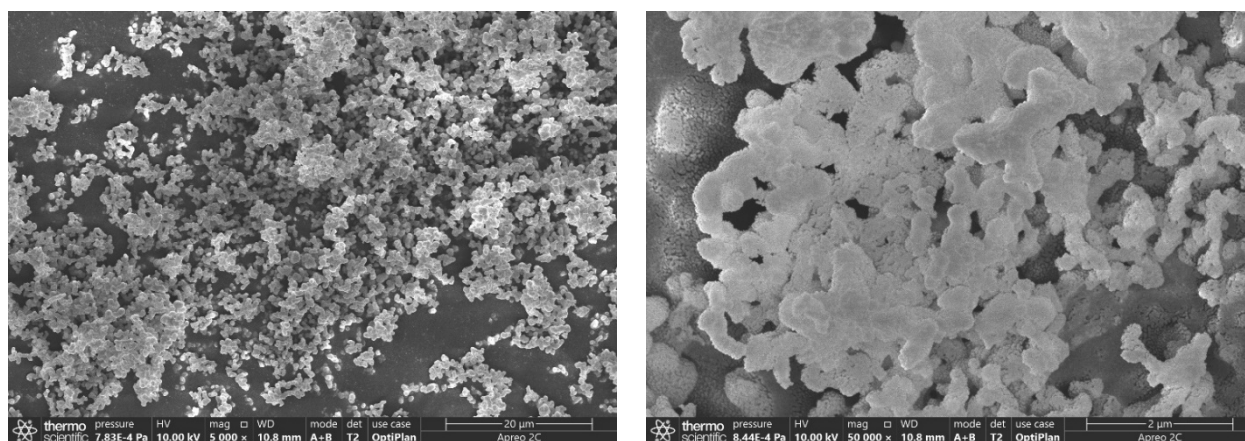

Fig. S62. Scanning electron microscopy images of  $I_2 \subset \text{EtAn}[2]$  after the release of iodine

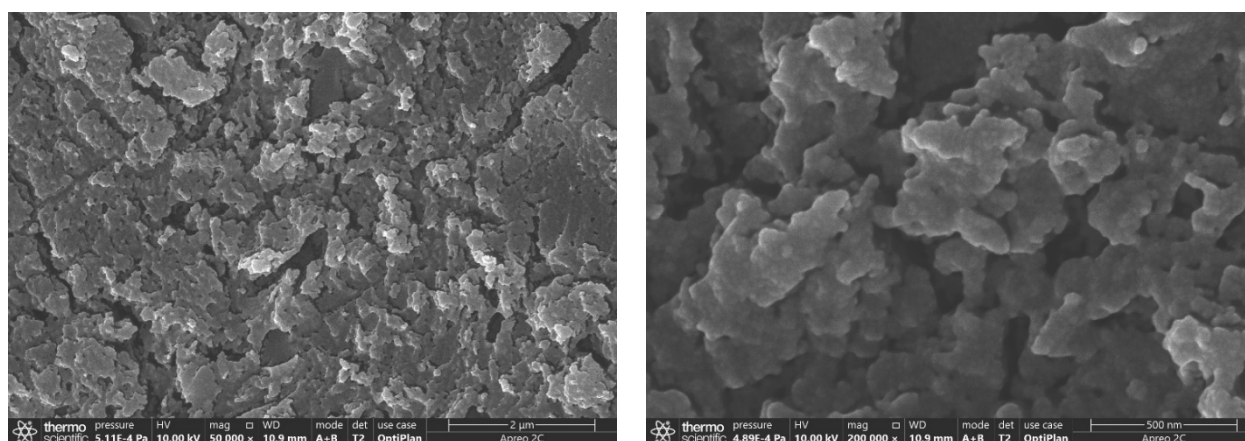

Fig. S63. Scanning electron microscopy images of  $I_2 \subset \text{PrAn}[2]$  after the release of iodine

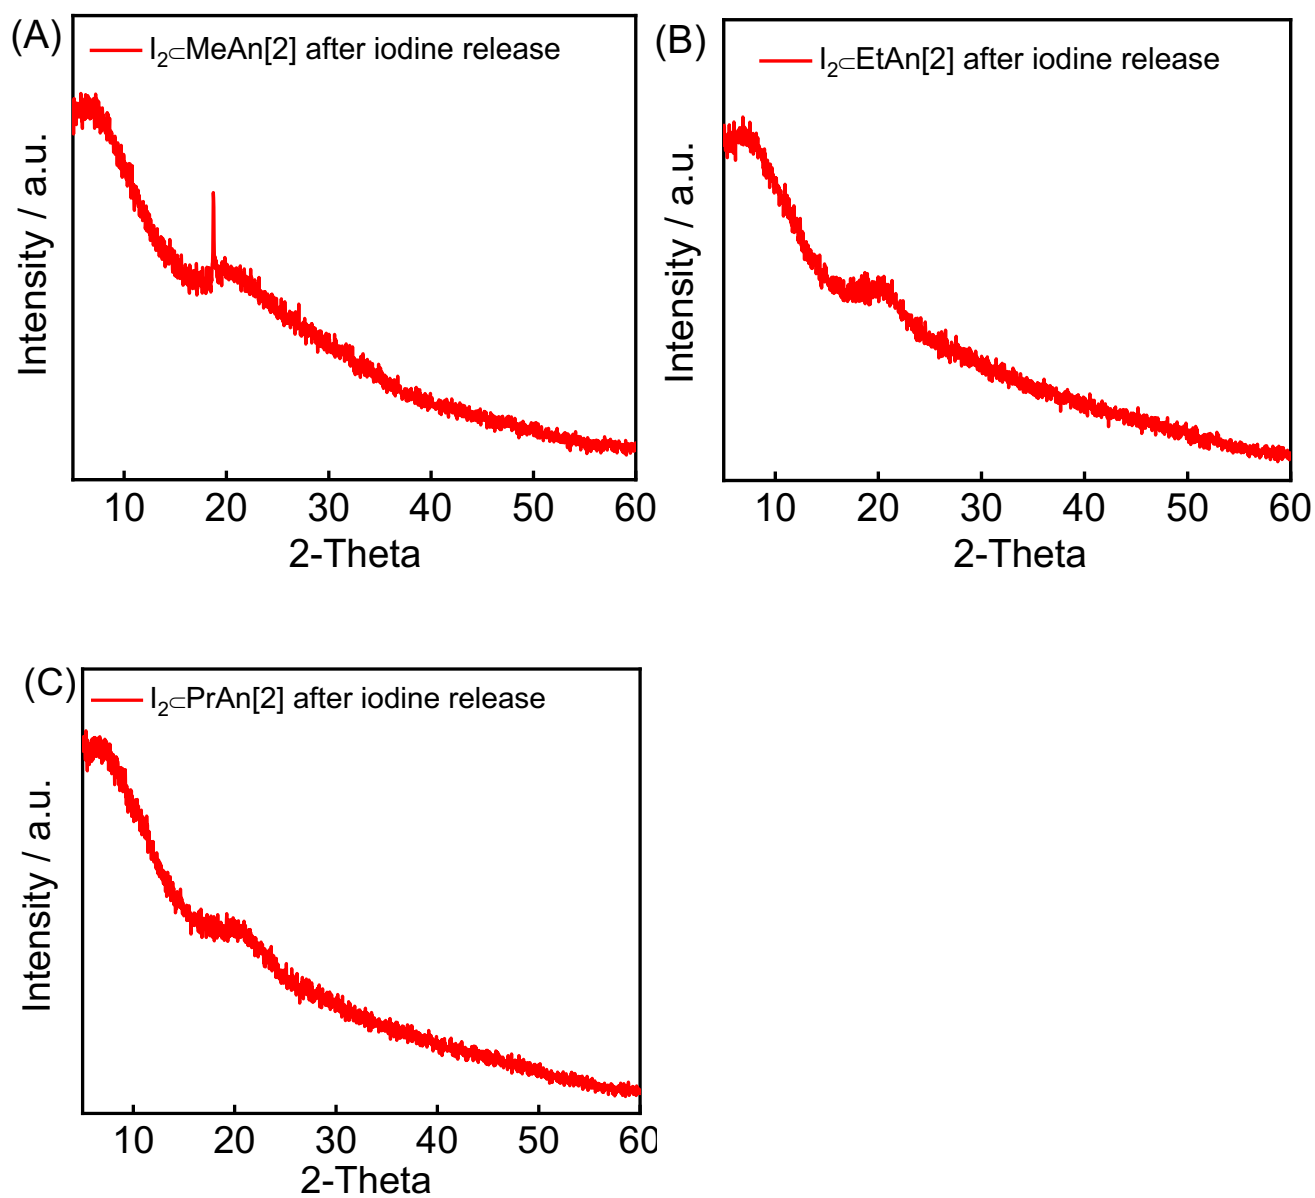

Fig. S64. X-ray powder diffractogram of (A) **MeAn[2]**, (B) **EtAn[2]** and (C) **PrAn[2]** after iodine release.

## 9. Selectivity and Reproducibility study

In the selectivity experiment, 5 mg of An[2]s or P-Ns was immersed into a binary solution which containing 5 mL of  $I_2$  solution (1 mM) and each of various interference anions solution ( $NO_3^-$ ,  $Cl^-$ ,  $CH_3COO^-$ ,  $Br^-$ ,  $SO_4^{2-}$ , and  $F^-$ ) (1 M). For 24h, the final mixture was stirred at room temperature and filtered. The concentration of iodine in the filtrate was determined by UV-Vis spectroscopy. Blank solution and mixed solution represent  $I_2$  solution (1 mM) with no or all competing ions, respectively. The efficiency of iodine removal (%) by the adsorbents subject to study was determined using equation (2):

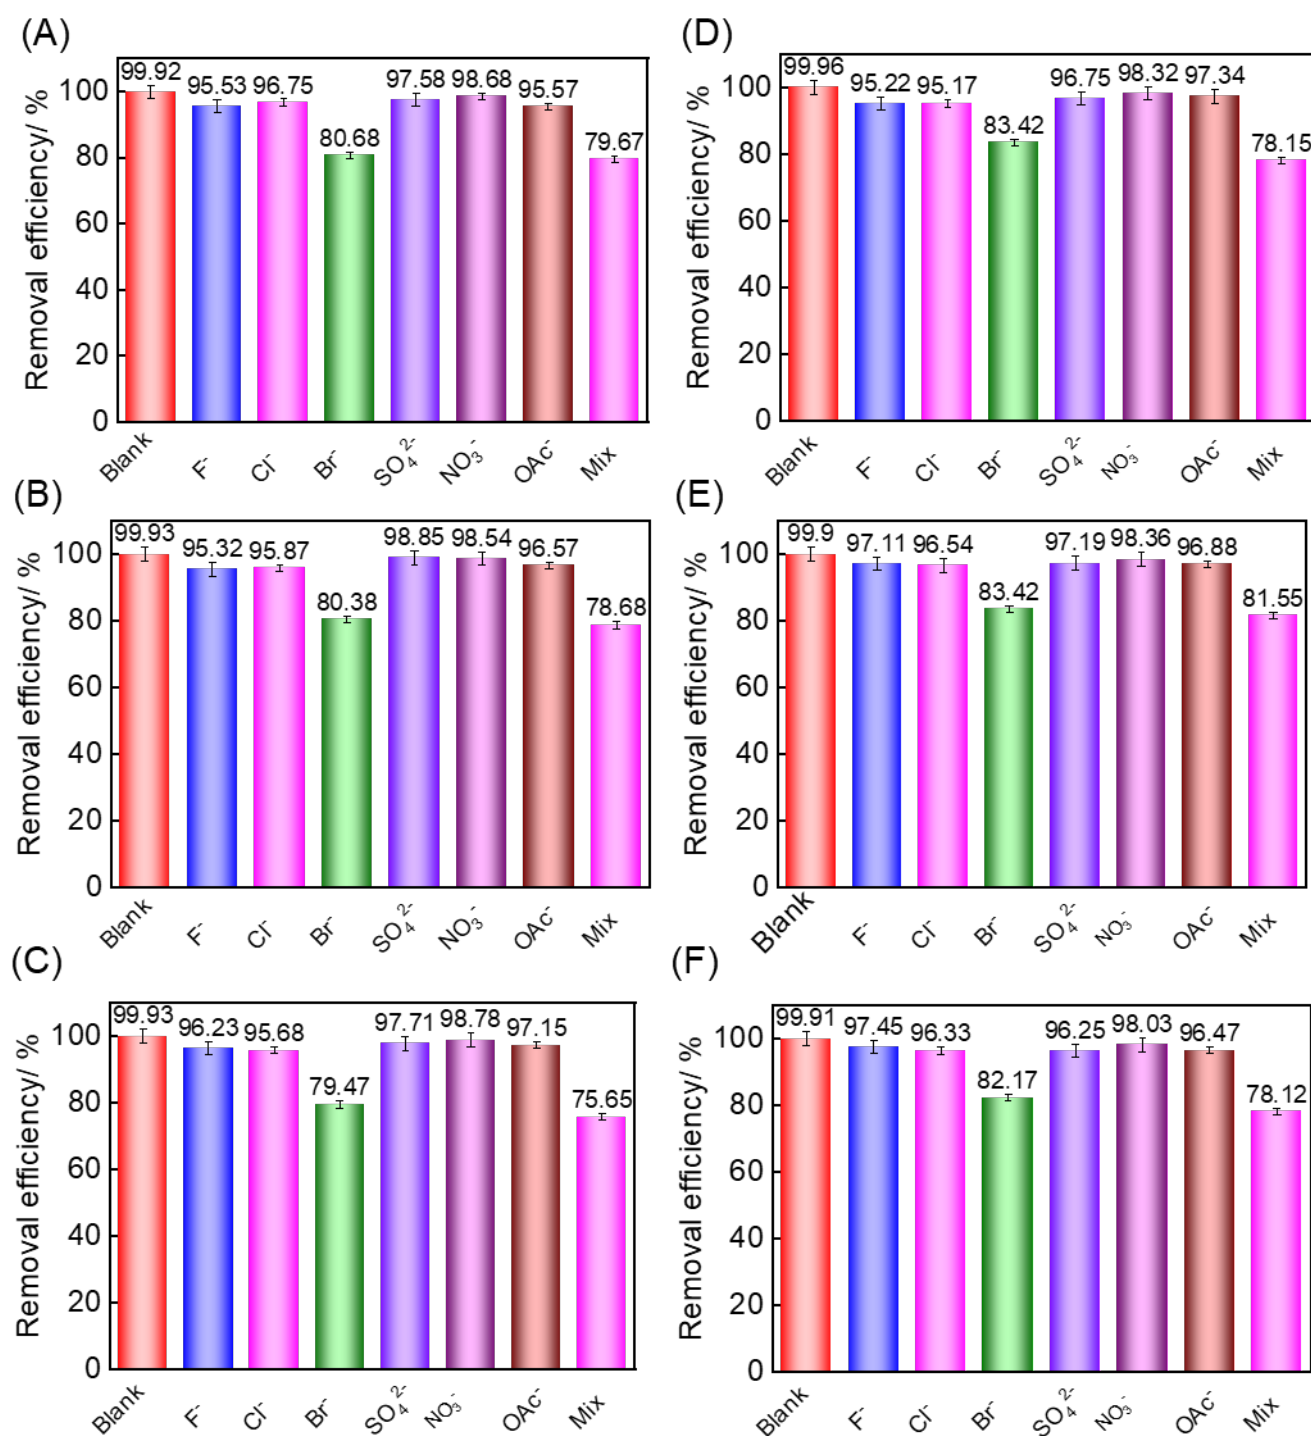

Fig. S65. The removal efficiency of aqueous  $I_2$  solution (1.0 mM) by (A) MeAn[2], (B) EtAn[2], (C) PrAn[2], (D) P-A, (E) P-B, and (F) P-C in the presence of no, a single or all interference ions.

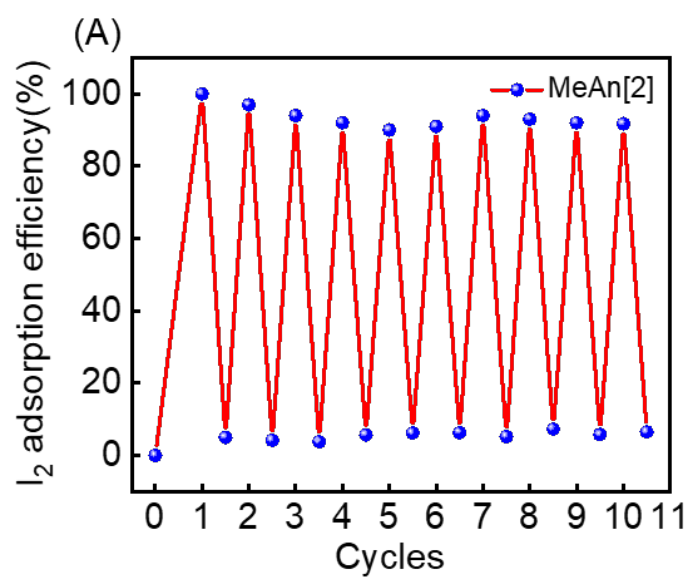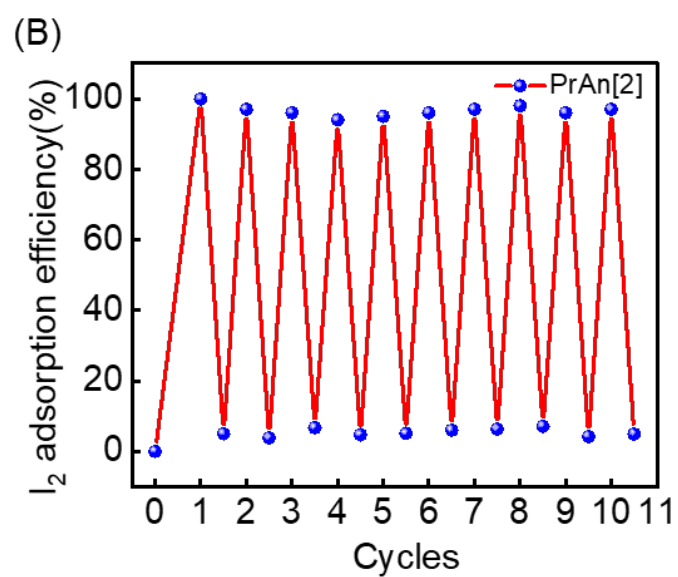

Fig. S66. Recycling performance of **MeAn[2]** and **PrAn[2]**.

---

## 10. References

- 1 P. J. Stephens, F. J. Devlin, C. F. Chabalowski and M. J. Frisch, *J. Phys. Chem.*, 1994, **98**, 11623–11627.
- 2 P. C. Hariharan and J. A. Pople, *Theoret. Chim. Acta*, 1973, **28**, 213–222.
- 3 E. Laviron, *Journal of Electroanalytical Chemistry and Interfacial Electrochemistry*, 1979, **100**, 263–270.
- 4 X. Yu, W. Wu, D. Zhou, D. Su, Z. Zhong and C. Yang, *CCS Chem.*, , DOI:10.31635/ccschem.021.202101036.
- 5 L. Xie, Z. Zheng, Q. Lin, H. Zhou, X. Ji, J. L. Sessler and H. Wang, *Angew. Chem. Int. Ed.*, 2021, **134**, e202113724.
